# Supplementary material for: Effectiveness of breathing exercises, foot reflexology and back massage (BRM) on labour pain, anxiety, duration, satisfaction, stress hormones and newborn outcomes among primigravidae during the first stage of labour in Saudi Arabia: a study protocol for a randomised controlled trial
Source: PubMed Central journal article supplement — BMJ Open. 2020 Jun 15;10(6):e033844. doi: 10.1136/bmjopen-2019-033844 (PMC7299053; doi:10.1136/bmjopen-2019-033844), 2020-06-15
Supplement: bmjopen-2019-033844.draft_revisions.pdf [file bmjopen-2019-033844.draft_revisions.pdf]

# BMJ Open

BMJ Open is committed to open peer review. As part of this commitment we make the peer review history of every article we publish publicly available.

When an article is published we post the peer reviewers' comments and the authors' responses online. We also post the versions of the paper that were used during peer review. These are the versions that the peer review comments apply to.

The versions of the paper that follow are the versions that were submitted during the peer review process. They are not the versions of record or the final published versions. They should not be cited or distributed as the published version of this manuscript.

BMJ Open is an open access journal and the full, final, typeset and author-corrected version of record of the manuscript is available on our site with no access controls, subscription charges or pay-per-view fees (<http://bmjopen.bmj.com>).

If you have any questions on BMJ Open's open peer review process please email [info.bmjopen@bmj.com](mailto:info.bmjopen@bmj.com)

# BMJ Open

## Effectiveness of Breathing Exercises, Foot Reflexology and Back Massage (BRM) on Labour Pain, Anxiety, Duration, Satisfaction, Stress Hormones, and New-born Outcomes among Primigravidae during the First Stage of Labour in Saudi Arabia: A Study Protocol for a Randomised Controlled Trial

|                               |                                                                                                                                                                                                                                                                                                                                                                                                                                                                                                                                                                                                                                                                                      |
|-------------------------------|--------------------------------------------------------------------------------------------------------------------------------------------------------------------------------------------------------------------------------------------------------------------------------------------------------------------------------------------------------------------------------------------------------------------------------------------------------------------------------------------------------------------------------------------------------------------------------------------------------------------------------------------------------------------------------------|
| Journal:                      | <i>BMJ Open</i>                                                                                                                                                                                                                                                                                                                                                                                                                                                                                                                                                                                                                                                                      |
| Manuscript ID                 | bmjopen-2019-033844                                                                                                                                                                                                                                                                                                                                                                                                                                                                                                                                                                                                                                                                  |
| Article Type:                 | Protocol                                                                                                                                                                                                                                                                                                                                                                                                                                                                                                                                                                                                                                                                             |
| Date Submitted by the Author: | 24-Aug-2019                                                                                                                                                                                                                                                                                                                                                                                                                                                                                                                                                                                                                                                                          |
| Complete List of Authors:     | Baljon, Kamilya; Universiti Putra Malaysia Faculty of Medicine and Health Sciences, Department of Family Medicine; Umm Al-Qura University, Department of Nursing<br>Romli, Muhammad Hibatullah ; Universiti Putra Malaysia Faculty of Medicine and Health Sciences, Department of Nursing & Rehabilitation<br>Ismail @ Daud, Adibah Hanim; Universiti Putra Malaysia Faculty of Medicine and Health Sciences, Department of Family Medicine<br>Khuan, Lee; Universiti Putra Malaysia Faculty of Medicine and Health Sciences, Department of Nursing & Rehabilitation<br>Chew, Boon; Universiti Putra Malaysia Faculty of Medicine and Health Sciences, Department of Family Medicine |
| Keywords:                     | Breathing exercises, Reflexology, Massage, Primigravidae, Labour pain, Stress hormones                                                                                                                                                                                                                                                                                                                                                                                                                                                                                                                                                                                               |
|                               |                                                                                                                                                                                                                                                                                                                                                                                                                                                                                                                                                                                                                                                                                      |

SCHOLARONE™  
Manuscripts

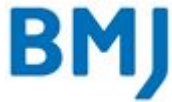

I, the Submitting Author has the right to grant and does grant on behalf of all authors of the Work (as defined in the below author licence), an exclusive licence and/or a non-exclusive licence for contributions from authors who are: i) UK Crown employees; ii) where BMJ has agreed a CC-BY licence shall apply, and/or iii) in accordance with the terms applicable for US Federal Government officers or employees acting as part of their official duties; on a worldwide, perpetual, irrevocable, royalty-free basis to BMJ Publishing Group Ltd ("BMJ") its licensees and where the relevant Journal is co-owned by BMJ to the co-owners of the Journal, to publish the Work in this journal and any other BMJ products and to exploit all rights, as set out in our [licence](#).

The Submitting Author accepts and understands that any supply made under these terms is made by BMJ to the Submitting Author unless you are acting as an employee on behalf of your employer or a postgraduate student of an affiliated institution which is paying any applicable article publishing charge ("APC") for Open Access articles. Where the Submitting Author wishes to make the Work available on an Open Access basis (and intends to pay the relevant APC), the terms of reuse of such Open Access shall be governed by a Creative Commons licence – details of these licences and which [Creative Commons](#) licence will apply to this Work are set out in our licence referred to above.

Other than as permitted in any relevant BMJ Author's Self Archiving Policies, I confirm this Work has not been accepted for publication elsewhere, is not being considered for publication elsewhere and does not duplicate material already published. I confirm all authors consent to publication of this Work and authorise the granting of this licence.

1  
2  
3 **Effectiveness of Breathing Exercises, Foot Reflexology and Back Massage (BRM) on**  
4 **Labour Pain, Anxiety, Duration, Satisfaction, Stress Hormones and New-born**  
5 **Outcomes among Primigravidae during the First Stage of Labour in Saudi Arabia:**  
6 **A Study Protocol for a Randomised Controlled Trial**  
7  
8

9 **Kamilya Baljon<sup>1,2</sup>, Muhammad Hibatullah Romli<sup>3</sup>, Adibah Hanim Ismail@Daud<sup>1</sup>,**  
10 **Lee Khuan<sup>3</sup>, Boon-How Chew<sup>1\*</sup>**  
11  
12

13  
14 *<sup>1</sup> Department of Family Medicine, Faculty of Medicine and Health Sciences, Universiti*  
15 *Putra Malaysia, 43400 Serdang, Selangor, Malaysia*  
16

17  
18 *<sup>2</sup> Nursing College, Umm, Al-Qura University, Makkah, Saudi Arabia*  
19

20  
21 *<sup>3</sup> Department of Nursing and Rehabilitation, Faculty of Medicine and Health Sciences,*  
22 *Universiti Putra Malaysia, 43400 Serdang, Selangor, Malaysia*  
23  
24

25  
26  
27  
28 Corresponding author: Boon-How Chew, Department of Family Medicine, Faculty of  
29  
30  
31  
32  
33  
34  
35  
36  
37  
38  
39  
40  
41  
42  
43  
44  
45  
46  
47  
48  
49  
50  
51  
52  
53  
54  
55  
56  
57  
58  
59  
60

Corresponding author: Boon-How Chew, Department of Family Medicine, Faculty of  
Medicine and Health Sciences, Universiti Putra Malaysia, 43400 Serdang, Selangor,  
Malaysia. Tel: +603-89472520. Fax: +603-89472328. Email:

[chewboonhow@upm.edu.my](mailto:chewboonhow@upm.edu.my)

## ABSTRACT

**Introduction** Labour pain is among the severest pains primigravidae may experience during pregnancy. Failure to address labour pain and anxiety may lead to abnormal labour. Despite the many complementary non-pharmacological approaches, the quality of evidence is low, and best approaches are not established. This study protocol describes a proposed investigation of the effects of a combination of breathing exercises, foot reflexology and back massage (BRM) on the labour experiences of primigravidae.

**Methods and analysis** This randomised controlled trial will involve an intervention group receiving BRM and a control group receiving standard labour care. Primigravidae of 26–34 weeks of gestation without chronic diseases or pregnancy-related complications will be recruited from antenatal clinics. Eligible and consenting patients will be randomly allocated to the intervention or the control group stratified by intramuscular pethidine use. The BRM intervention will be delivered by trained masseuses. The primary outcomes of labour pain and anxiety will be measured during and after uterine contractions at baseline (cervical dilatation 6 cm) and post-BRM hourly for two hours. The secondary outcomes include maternal stress hormone (adrenocorticotrophic hormone, cortisol and oxytocin) levels, maternal vital signs, labour duration, maternal satisfaction, foetal heart rate and Apgar scores. The sample size is estimated based on the between-group difference of 0.6 in anxiety scores, 95% power and 5%  $\alpha$  error, which yields a required sample size of 154 (77 in each group) accounting for a 20% attrition rate. The between- and within-group outcome measures will be examined with mixed-effects regression models, time series analyses and paired t-test or equivalent non-parametric tests, respectively.

**Ethics and dissemination** Ethical approval was obtained from the Ethical Committee for Research Involving Human Subjects of the Ministry of Health in the Saudi Arabia (H-02-

1  
2  
3 K-076-0319-109) on 14 April 2019. Written informed consent will be obtained from all  
4  
5 the participants.  
6

7  
8 **Trial registration number and date** ISRCTN87414969, registered 3 May 2019  
9

10 **Keywords** Breathing exercises, Reflexology, Massage, Primigravidae, Labour pain, Stress  
11  
12 hormones.  
13

## 14 15 **Article Summary**

### 16 17 18 **Strengths and Limitations of the Study**

- 19  
20 • This single-blinded parallel randomised controlled trial will explore the combined  
21  
22 effects of breathing exercises, feet reflexology and back massage (BRM) on pain  
23  
24 and anxiety relief during labour in healthy primigravidae with singleton foetus.  
25  
26
- 27  
28 • The effects of BRM will be examined through the objective physiological outcomes  
29  
30 of stress hormone levels between groups before and after the intervention.  
31  
32
- 33  
34 • Trained masseuses will deliver BRM to pregnant women.  
35
- 36  
37 • The intervention will be applied for one hour and only once during the first stage  
38  
39 of labour after cervical dilatation of 6 centimetres.  
40
- 41  
42 • Blinding of the primigravidae mothers is not possible, and there may be bias in the  
43  
44 self-assessed outcomes.  
45

46 **Word count** 4,091 words  
47

## 48 49 **INTRODUCTION**

50  
51  
52 Many primigravidae have reported experiencing various levels of pain and high levels of  
53  
54 anxiety about the labour process and outcomes. These feelings of pain and anxiety may  
55  
56  
57  
58  
59

1  
2  
3 occur in the early stages of labour and during labour itself<sup>1-3</sup>. Anxiety extending to fear is  
4 a common issue related to labour, especially among primigravidae<sup>4,5</sup>. Other recorded  
5 negative perceptions and psychological effects influencing labour experiences include  
6 distress and feelings of powerlessness during labour for women and their families<sup>5-7</sup>.  
7  
8  
9

10  
11  
12  
13  
14 When poorly managed, labour pain may lead to severe consequences for women such as  
15 prolonged labour<sup>5,8</sup>, which may increase the risk of foetal distress, head compressions,  
16 intrauterine foetal death, low Apgar scores and physical injuries to neonates<sup>5,9</sup>. Prolong  
17 labour results in increased risk of caesarean section, induced labour and assisted delivery  
18 using vacuum and forceps<sup>10,11</sup>. Studies have also reported negative mental impacts on  
19 women, sometimes to the extent of postnatal post-traumatic anxiety disorder<sup>12,13</sup> and  
20 subsequently reduced quality of life<sup>14</sup>. Feelings of anxiety often originate from possible  
21 birthing complications about which pregnant women have heard and read<sup>4,5,15,16</sup> and may  
22 even result in women refusing normal vaginal delivery and insisting on caesarean sections  
23 without medical indications<sup>17</sup>. It, therefore, is important for healthcare professionals to  
24 assist and educate all expectant mothers on labour pain management.  
25  
26  
27  
28  
29  
30  
31  
32  
33  
34  
35  
36  
37  
38  
39  
40  
41

42 Appropriate labour pain management and interventions are important aspects of obstetric  
43 care to ensure optimum outcomes for mothers and babies<sup>18</sup>. Pharmacologic interventions  
44 used in management of labour pain include systemic sedatives, analgesics and regional  
45 anaesthesia<sup>19</sup>. Examples of these analgesics are aerosol and epidural opioids, intramuscular  
46 pethidine (IMP) and intravenous sedatives<sup>20,21</sup>. Some of these are expensive and may be  
47 associated with adverse effects on mothers, the labour process and neonates<sup>22</sup>.  
48  
49  
50  
51  
52  
53  
54  
55  
56  
57  
58  
59  
60

1  
2  
3 In contrast, most non-pharmacological methods for labour pain management are simple  
4 and non-invasive and often are cheaper and safer than pharmacological interventions<sup>23–25</sup>.  
5  
6 Studies have found that non-pharmacological approaches, particularly breathing exercises,  
7  
8 have positive impacts on relief of labour pain<sup>26–28</sup> and anxiety in pregnant mothers<sup>29–31</sup>.  
9  
10 Non-pharmacological approaches are especially true for Lamaze breathing, deep breathing  
11  
12 exercises<sup>26–28,32,33</sup>, reflexology<sup>34,35</sup> and massage<sup>36</sup>. Non-pharmacology has been linked to a  
13  
14 shorter labour duration<sup>37</sup> and improved new-born outcomes<sup>38</sup>. Our systematic review found  
15  
16 that massage is beneficial for relieving labour pain<sup>39</sup> and is associated with greater  
17  
18 relaxation, higher alertness levels, improved mood and reduced stress hormone (cortisol)  
19  
20 levels and anxiety symptoms<sup>40</sup>.  
21  
22  
23  
24  
25

## 26 **Rationale**

27  
28 It is hypothesised that non-pharmacological approach of labour pain management occurs  
29  
30 via the alteration of nociceptive stimuli and modification of the processing of nociceptive  
31  
32 input at the central level. With that, there is an overall improved sense of comfort and well-  
33  
34 being, ultimately leading to stronger coping capabilities by the mothers in labour <sup>41</sup>.  
35  
36  
37  
38  
39  
40

41 The physiological mechanism of breathing is a protective action as it is a fight-or-flight  
42  
43 reflex triggered by the central nervous system. Physiologically, deep abdominal breathing  
44  
45 stimulates the parasympathetic nervous system. As a result, the blood circulation in  
46  
47 pregnant women will undergo oxygenation, during which it will trigger the release of  
48  
49 endorphins which are associated with the decrease in heart rate and promoting the releasing  
50  
51 the feelings of calmness. At the same time, endorphins can also suppress the sympathetic  
52  
53 system, leading to a decrease in the release of stress hormones such as cortisol <sup>42,43</sup>.  
54  
55  
56  
57  
58  
59  
60



1  
2  
3 As for reflexology, so far there has been no constructive explanation on the underlying  
4 mechanism in reducing labour pain<sup>35,37</sup>. However, there are several postulated theories for  
5 its mechanism of action. Firstly, the autonomic-somatic integration theory suggests that the  
6 pressure applied to the feet during reflexology compresses the receptors in the cells, thus  
7 opening up the ionic channels in the plasma membrane and triggering a local action  
8 potential to convey messages to the spinal cord and/or brain<sup>44</sup>. The application of  
9 alternating pressure to the feet may also produce predictable reflexive actions within the  
10 nervous system and activates the parasympathetic nervous system<sup>45</sup>.

11  
12  
13  
14  
15  
16  
17  
18  
19  
20  
21  
22  
23  
24 Another contemporary method explains that reflexology acts through a “sympathetic  
25 resonance” manner, in which energy wave between therapist and clients are inter-  
26 conducted to achieve homeostatic balance<sup>46</sup>. This may occur through local enzymatic  
27 reactions on receptive fields or through an improved blood supply as a result of local skin  
28 temperature changes following the skin-to-skin contact<sup>47</sup>. Reflexologists also believe that  
29 the application of deep pressure on certain reflex points of the sole and palm may break  
30 any calcium crystals and uric acid accumulated in nerve endings may cause blockages and  
31 induces pain<sup>48</sup>. Furthermore, reflexology also results in body relaxation and stimulation of  
32 any blocked nerve endings. These may propel any sluggish glands or organs to regain their  
33 normal functioning<sup>49</sup>. There is still ambiguity regarding the theories and mechanism of  
34 action of foot reflexology for labour pain, as compared to that for general pain.  
35  
36  
37  
38  
39  
40  
41  
42  
43  
44  
45  
46  
47  
48  
49  
50  
51  
52  
53  
54  
55  
56  
57  
58  
59  
60 Nonetheless, it is plausible to believe that reflexology techniques would have similar  
physiological effects for labour pain that bring about a sense of wellbeing, analgesia and  
subsequently the perception of pain relief through control gate<sup>38</sup>.

1  
2  
3 Massage therapy is another type of the commonly used Complementary and Alternative  
4 Methods (CAM) for the promotion of health and wellbeing <sup>36</sup>. Massage produces a short-  
5 lived analgesic effect by activating the 'pain gate' mechanism <sup>50</sup>. Massage works as a potent  
6 mechanical stimulus and it is a particularly effective trigger for the pain gate process. A  
7 longer-lasting pain control appears to be mediated mainly by the descending pain  
8 suppression mechanism by activation of descending efferent pathways <sup>51</sup>. The inhibition of  
9 pain-transmission neurons is a combination of the physiological and neurological  
10 mechanisms and it is commonly activated by noxious stimulation <sup>52</sup>. Figure 1 summarized  
11 the possible mechanisms of massage <sup>53</sup>.  
12  
13  
14  
15  
16  
17  
18  
19  
20  
21  
22  
23  
24  
25

26 The three aforementioned therapies (i.e. BRM) for labour pain management have been  
27 shown to influence the secretion of certain stress hormones such as the cortisol,  
28 adrenocorticotrophic hormone (ACTH), and oxytocin <sup>40,54-56</sup>. Endorphins <sup>57</sup>. <sup>56-60</sup>.  
29 Endogenous oxytocin is a key component in the molecular pathways that buffer reaction  
30 to stress and decreases sensitivity to pain and inflammation<sup>61</sup> and Cortisol is an important  
31 hormone released during stressful conditions <sup>40</sup>.  
32  
33  
34  
35  
36  
37  
38  
39  
40

### 41 **Significance of this clinical trial**

42  
43  
44 Many studies have reported that not all pharmacologic and non-pharmacologic methods on  
45 their own would be able to eliminate labour pain satisfactorily. Despite the intervention,  
46 some mothers still endure some pain, anxiety, prolonged labour and suffer from negative  
47 maternal and perinatal consequences <sup>5,15,16</sup>. From the perspective of complementary  
48 management, BRM are the techniques with the highest potential in managing pain and  
49 anxiety for primigravidae. Other systematic reviews have also concluded that CAM  
50  
51  
52  
53  
54  
55  
56  
57  
58  
59  
60

1  
2  
3 interventions to manage pain and anxiety during labour were often poorly executed and  
4 present with biases, thus resulting in low quality of evidence <sup>62-65</sup> with no strongly  
5 supported evidence <sup>66,67</sup>.  
6  
7  
8  
9

10  
11 Therefore, there is a need for a rigorous and robust trial to examine the effect of the  
12 combined intervention of BRM on labour pain, anxiety, labour duration, satisfaction, stress  
13 hormones, and neonatal outcome among the primigravidae using multiple relevant  
14 outcome measures.  
15  
16  
17  
18  
19  
20  
21  
22

## 23 **METHODS AND DESIGN**

24  
25 This study aims to investigate the combined effect of breathing, reflexology and back  
26 massage on labor pain, duration of labor, anxiety, maternal satisfaction, stress hormones,  
27 and new-born outcome among primigravidae in Saudi Arabia. The specific objectives are  
28 1) to compare the effect of the combined breathing exercise, foot reflexology, and back  
29 massage (intervention) on labor pain intensity, anxiety level, duration of labor, maternal  
30 satisfaction, stress hormones, and neonatal outcome compared to the standard midwifery  
31 care (control), 2) to identify the predictors of pain, anxiety, duration of labor, the  
32 satisfaction of mother, and neonatal outcome from the baseline sociodemographic and  
33 obstetric characteristics.  
34  
35  
36  
37  
38  
39  
40  
41  
42  
43  
44  
45  
46

### 47 **Study Design**

48  
49 The study design will be a single-blinded parallel randomised controlled trial (RCT), in  
50 which the participants are randomly assigned to receive either the BRM intervention or  
51 control care.  
52  
53  
54  
55  
56  
57  
58  
59  
60

## Study Setting

This study will be conducted in the Makkah Maternity and Children Hospital, a governmental maternity hospital in Makkah, Saudi Arabia which provides only maternal and child health services. The hospital is a tertiary-level referral hospital with special services for paediatrics, gynaecology, and obstetrics services <sup>68</sup>. In Saudi Arabia, almost all tertiary hospitals, including our study site, offer systemic pharmacologic agents, either intravenous or intramuscular analgesics to manage pain during labour <sup>69</sup> however, non-invasive and non-pharmacological methods of pain relief during labour are not common practices <sup>69</sup>. To our best knowledge, the combined effect of BRM on primigravidae has not been investigated at any Saudi Arabia hospital prior to this trial.

## Participants

The study participants will include primigravidae, age 20- 35 years old, at 37 to 41 weeks of gestation, and in the first stage of labor. The inclusion criteria include singleton pregnancy, cephalic presentation, and regular contraction. In labor, the participants must achieve six centimeters of cervical dilatation, with a minimum of 3 contractions with at least moderate intensity every 10 minutes, in which the duration of the contraction must be between 30-60 seconds.

The exclusion criteria are diagnosed with underlying chronic diseases such as cardiovascular diseases, kidney disease, diabetes, asthma, mental health disorders, epilepsy, or seizure. Those with pregnancy-related diseases such as gestational diabetes, preeclampsia, cephalo-pelvic disproportion, polyhydramnios or oligohydramnios, and

1  
2  
3 deep venous thrombosis will be excluded. Pregnancy with complications such as placenta  
4 praevia, antepartum hemorrhage, fetal distress or put on analgesics other than  
5 intramuscular Pethidine (IMP) will not be enrolled in the trial.  
6  
7  
8  
9  
10

## 11 **Recruitment**

12  
13  
14  
15 Recruitment will be conducted at the antenatal clinic in the trial site. Only those who plan  
16 to deliver in the trial hospital's delivery room will be further briefed and assessed of their  
17 eligibility. In this hospital, antenatal mothers are given monthly follow-up appointments  
18 until 28 weeks' gestation. The frequency increases to 2-weekly until 32 weeks' gestation,  
19 before patients are seen weekly until delivery. For this study, we will approach  
20 primigravidae between 26 to 34 weeks of gestation in equal numbers based on the  
21 gestational weeks. In this way, the numbers of expected deliveries will be spread out in the  
22 subsequent 2-3 months.  
23  
24  
25  
26  
27  
28  
29  
30  
31  
32

33  
34  
35 At the antenatal clinic, the principal investigator will provide general health education  
36 about pain management during labor. The participant information sheet of this RCT will  
37 be provided for the eligible patients. If they are interested to participate, they will sign a  
38 written consent form and they will be identified through a unique stamp on their antenatal  
39 cards. When the consented participants arrive in the labour room for delivery, they will be  
40 re-evaluated for the eligibility.  
41  
42  
43  
44  
45  
46  
47  
48

## 49 **Randomisation**

50  
51  
52 Since IMP is a commonly prescribed analgesic in labour and it may have substantial effects  
53 on the primigravidae and neonates, randomisation will be stratified according to the  
54  
55  
56  
57  
58  
59  
60

1  
2  
3 administrative status of IMP. This will ensure the same numbers of primigravidae with and  
4 without IMP in the intervention and control groups. To achieve this, we use a block of size  
5  
6 4 with a 1:1 allocation ratio, leading to a possibility of 6 permutations. All possible block  
7  
8 sequences will be randomly generated with the help of free software from the internet  
9  
10 <https://www.sealedenvelope.com/simple-randomiser/v1/>. A random list will be created  
11  
12 after the sample size number, treatment groups, block sizes, list length, and stratification  
13  
14 factors are entered into the software. The order of the subjects will be used by the research  
15  
16 coordinator who is stationed in the delivery room to conduct the random group allocation  
17  
18 for primigravidae in labour who have achieved a cervical dilation of 6 cm. The principal  
19  
20 investigator, outcome assessors, and masseuses in this trial are not involved in the  
21  
22 allocation of interventional groups. Figure 2 outlines the CONSORT flow diagram.  
23  
24  
25  
26  
27

### 28 **Data Collection**

29  
30  
31 Every questionnaire will be coded with a unique number. Data collection in the delivery  
32  
33 room will be facilitated by the trained research coordinator and two outcome assessors.  
34  
35 The outcome assessors will be assigned to the same control or the intervention group on  
36  
37 the same day. Once the form is completed by the outcome assessors, it will be kept by the  
38  
39 research coordinator in a safe location in the delivery room.  
40  
41  
42  
43  
44

45 Throughout all the outcome assessment time points, a masseuse will be present in the  
46  
47 delivery room of both the intervention and control groups. For the intervention group, the  
48  
49 primigravidae in labour will receive the BRM intervention by the masseuse. However, for  
50  
51 the control group, the practicing midwife will perform the routine labour care in the  
52  
53 presence of a masseuse such as touch therapy, ensuring the mother lying on the left side,  
54  
55  
56  
57  
58  
59  
60

1  
2  
3 and providing encouragement and counselling. The outcome assessor will measure and  
4 assess at the same time points in both the intervention and control groups. Both the  
5 intervention and the control groups will be equipped with the similar extra equipment. This  
6 blinding effort is to further minimize biases during the outcome assessment. However,  
7 blinding of the participants will be impossible because the nature of the intervention does  
8 not allow to be applied.  
9

### 10 11 12 **Interventions**

13  
14  
15  
16  
17  
18  
19  
20  
21  
22  
23  
24  
25  
26  
27  
28  
29  
30  
31  
32  
33  
34  
35  
36  
37  
38  
39  
40  
41  
42  
43  
44  
45  
46  
47  
48  
49  
50  
51  
52  
53  
54  
55  
56  
57  
58  
59  
60  
The BRM intervention consists of 5 minutes of breathing exercise followed by 10 minutes  
of foot reflexology on each sole and 35 minutes of continuous massage over the lower  
limbs and back. And the masseuse will allow the primigravidae for moving and changing  
her position during intervention time and answer any question or inquiry. Table 1 provides  
a detailed procedure of the BRM intervention. As for the control group, the primigravidae  
in labour will receive routine practice.

### 61 62 63 64 65 66 67 68 69 70 71 72 73 74 75 76 77 78 79 80 81 82 83 84 85 86 87 88 89 90 91 92 93 94 95 96 97 98 99 100 **Training for the research team members**

A total of 13 research assistants will be recruited and trained for the intervention and data  
collection from June to December 2019 (Figure 4). They will be given the BRM training  
for one week by the principal investigator who has completed the professional massage  
training by a certified training center in Malaysia (Tim Body Care Training Centre  
1403695-D).

## Study Outcomes and Measures

There are nine outcomes comprising of two primary outcomes and seven secondary outcomes. The two primary outcomes are pain intensity and anxiety level (See Table 2).

In this study, the pain intensity will be measured multiple times during and after contraction (Figure 3a). It will first be measured at baseline before the intervention. During the intervention, the pain intensity will be measured after breathing exercise and foot reflexology therapy (after 25 minutes from the start of the intervention) followed by another assessment halfway through the massage therapy (after 45 minutes) during and after contraction. Upon completion of the intervention, the measurement will be taken immediately followed by twice hourly thereafter during the first stage of labour. The pain will be measured for every participating primigravidae in both intervention and control groups. For the control group, the pain intensity will be measured, first at baseline before the intervention time at 6 cm. During the intervention time, the pain intensity will be measured after 25 minutes from the start of the intervention time, followed by another assessment after 45 minutes, during and after contraction. Upon completion of the intervention time, the measurement will be taken immediately followed by twice hourly thereafter during the first stage of labour (Figure 3b).

The ASPWL will be used to assess anxiety during labour. The anxiety level will be measured at cervical dilatation of 6cm, after the completion of the interventions, and twice every 60 minutes during the first stage of labour. For the control group, the assessment will be performed when the cervix is 6 cm, after one hour (synchronized to the completion of



1  
2  
3 the intervention in the intervention group), and twice every 60 minutes during the first stage  
4 of labour (Figure 3b).  
5  
6

7  
8  
9  
10 The secondary outcomes measured in the RCT include maternal stress hormones level,  
11 maternal VS, duration of labour, maternal satisfaction, FHR, and neonatal Apgar score.  
12  
13 (See Table 3).  
14  
15

16  
17  
18 The stress hormones level will be measured again one and a half hour after the patient has  
19 reached 6 cm of cervical dilatation. Blood samples will again be taken by midwives on  
20 duty in the delivery room. This occurs after the BRM intervention in the intervention group,  
21 and the same will occur at the same timing in the control group. The blood sample will be  
22 sent to a laboratory in the hospital immediately by the research coordinator.  
23  
24  
25  
26  
27  
28  
29  
30

31  
32 The maternal V/S and FHR will be collected twice at 6cm cervical dilatation and  
33 immediately post-BRM for intervention group, and the same data will be collected at the  
34 timing for the control groups.  
35  
36  
37  
38  
39  
40

41 The Apgar Scores (taken from the delivery room medical record) and maternal satisfaction  
42 will be measured only once at the end of the childbirth before the transfer of the mother  
43 from the delivery room to postnatal wards.  
44  
45  
46  
47

### 48 **Sample size**

49

50  
51 The sample size estimation was based on a review of similar literature on pain and anxiety  
52 as outcomes<sup>70</sup> and calculated using G\*power free software<sup>70</sup>. We estimated the effect size  
53  
54  
55  
56  
57  
58  
59

1  
2  
3 of 0.6 on anxiety mean score reduction in the intervention group compared to the control  
4  
5 <sup>70</sup> as this gives a larger required sample size compared to that based on the primary outcome  
6  
7 of pain. Thus, with the power of 95% at  $\alpha$  error 0.05, the required sample size is 128 for  
8  
9 the two groups. It is further inflated to 154 with a 20% attrition rate. Therefore, a minimum  
10  
11 number of 77 primigravidae will be recruited for each group.  
12  
13

### 14 15 **Statistical analysis**

16  
17  
18 Data will be entered by a blinded enumerator. The database will be checked for accuracy  
19  
20 before analysis. The principal investigator has the overall responsibility for compilation,  
21  
22 maintenance, and management of the study database. The analysis will be performed using  
23  
24 IBM Statistical Package for Social Science (SPSS) version 25.  
25  
26

27  
28  
29 Descriptive statistical analysis will be performed according to the distribution of the data,  
30  
31 using means and standard deviations for data with normal distribution, and median and  
32  
33 inter-quartile ranges for data that are not normally distributed. Normality testing will be  
34  
35 conducted for all continuous variables using different methods such as Histogram and p-p  
36  
37 plot. Categorical variables will be reported in frequencies and percentages.  
38  
39

40  
41  
42  
43 The differences between the groups and times level will be analysed using a mixed model  
44  
45 or Generalised Linear Mixed Model (GLMM). GLMM is appropriate where repeated  
46  
47 measurements are made on the same statistical units. GLMM is also used to accommodate  
48  
49 non-normal distribution in outcome data. The variables of time in a categorical form,  
50  
51 intervention group, a group\*time interaction, and the baseline random part of the model  
52  
53 will include a random intercept and an unstructured correlation matrix for the correlation  
54  
55  
56  
57  
58  
59

1  
2  
3 of measurements within pregnant women. The fixed part of the model will include pain  
4 score whereby the difference in pain score at every time point will be tested using a linear  
5 contrast. We will take the pain intensity measured with PBI and VAS at one-hour post  
6 intervention as the main co-primary outcomes. This is because the effects of the massage  
7 and reflexology are still observable and fairly compared to the control group <sup>44,51</sup>.

8  
9  
10  
11  
12  
13  
14  
15  
16 Any significant baseline imbalances will be adjusted for in the analysis. If necessary,  
17 multiple imputations will be conducted for the missing data. A calculated 95% confidence  
18 interval and two-sided  $\alpha$  of 0.05 will be used to test significance. In addition, we will  
19 analyze PBI and VAS at same time points and measure the agreement between PBI and  
20 VAS by using the Spearman correlation coefficient and interclass correlation. We will  
21 analyze other outcomes in the same statistical strategy as mentioned above. Additionally,  
22 we will conduct time series analyses to examine the patterns of change in the outcomes  
23 between the two groups and after BRM intervention.

24  
25  
26  
27  
28  
29  
30  
31  
32  
33  
34  
35  
36  
37 Independent effect of socio-demographic and obstetric characteristics on each primary and  
38 secondary outcome at one-hour post-intervention will be analysed using the multiple linear  
39 regression analyses.

## 40 41 42 43 44 45 **Discussion**

46  
47  
48 There are different types of complementary therapies that have been shown to be beneficial  
49 to reduce or alleviate labour pain but the evidence is scarce on the effects of combined  
50 therapies <sup>71</sup>. Safe and efficient pain management is important for pregnant women and their  
51 families <sup>18</sup>. Therefore, we design this trial to study the effects of BRM on labour pain and  
52  
53  
54  
55  
56  
57  
58  
59  
60

1  
2  
3 other psychological and physiological impacts among the primigravidae. The study  
4 protocol for an RCT is to determine the combined effect of BRM on the intensity of pain  
5 and level of anxiety in primigravidae during the first stage of labour. Additional outcomes  
6 that will be assessed include the maternal satisfaction, stress hormones, maternal VS, FHR,  
7 and neonatal Apgar score.  
8  
9  
10  
11  
12  
13  
14  
15  
16

17 In this study, we will assess the outcomes using a mixture of subjective and objective tools.  
18 For example, pain intensity and anxiety levels are subjective measurements, they are  
19 subjective due to the personal feelings and judgment of the respondents. Duration of labour,  
20 neonatal Apgar score, and maternal stress hormones level of ACTH, cortisol, and oxytocin  
21 will be the objective measurements. This is one of the strengths of our study. These stress  
22 hormones are the objective outcomes that will indicate the stress response to the BRM  
23 intervention conducted on the primigravidae.  
24  
25  
26  
27  
28  
29  
30  
31  
32  
33  
34

35 Some of the tools used in this study such as VAS might not be the gold or referent standard  
36 to measure labour pain outcome but this is one of the multiple outcomes and alternative  
37 ways of measuring the effectiveness of BRM. VAS is a commonly used graphic rating  
38 method <sup>72</sup>. However, VAS has its inconsistency of results and has ceiling effect <sup>73,74</sup>.  
39 Recognizing this inadequacy, we will ensure the participants understand the VAS scoring  
40 at admission to the delivery room before they are asked to indicate their pain level later,  
41 and the labour pain outcome will be measured by two different methods and multiple  
42 measurements will be taken during and after contraction, before and after the intervention.  
43  
44  
45  
46  
47  
48  
49  
50  
51  
52  
53  
54  
55  
56  
57  
58  
59  
60

1  
2  
3 As alluded to, we will complement VAS with pain intensity assessment using the PBI<sup>70</sup> to  
4 be rated by outcome assessors. There will also be other outcomes that are related to the  
5 maternal response to pain, which are the anxiety level and maternal stress hormones<sup>75</sup>.  
6  
7  
8  
9

10  
11  
12 There are several other limitations in this study. Firstly, the intervention will be performed  
13 for one hour during which it may be interrupted by routine medical care such as regular  
14 vaginal examinations, VS measurements, and fetal heart monitoring. However, we believe  
15 that this will not reduce the effect of BRM intervention, because we can start the BRM  
16 before or after labour care routine. Secondly, the process of labour and birthing is  
17 unpredictable even if the participants are low-risk pregnant women. In certain instances,  
18 the process of the intervention might not go well as planned and this may reduce the sample  
19 size. Some patients may end up needing a caesarean section due to various reasons and  
20 some may suffer from other obstetric complications during delivery. As a result, we have  
21 inflated the sample size accordingly. Apart from that, results from this study will not be  
22 generalisable to multigravidae as we include only primigravidae. Nevertheless, we believe  
23 primigravidae will benefit the most from the intervention as they are likely to experience a  
24 higher level of labour pain and a longer duration of the labour compared to multigravidae.  
25  
26  
27  
28  
29  
30  
31  
32  
33  
34  
35  
36  
37  
38  
39  
40  
41  
42  
43

44 Also, the intervention will be applied only once and only during the first stage of labour  
45 even though the first stage of labour among primigravidae take approximately 8-12 hours.  
46 By timing the intervention after cervical dilation of 6 cm and above, the effect of the  
47 combined BRM could exert its most influences if there is any on the labour experience of  
48 the primigravidae and neonatal outcome because this period is believed to be with the  
49 highest levels of labour pain.  
50  
51  
52  
53  
54  
55  
56  
57  
58  
59  
60

1  
2  
3 This study will assess the anxiety level of pregnant mothers. Unlike the labour pain, the  
4 level of anxiety can be affected by the individual characteristics, previous life experience,  
5 and other environmental causes <sup>76</sup>. However, we believe that these factors may not play a  
6 significant role after effective randomisation.  
7  
8  
9  
10  
11  
12

13  
14 Apart from the actual labour experience, there are a few other external factors that may  
15 affect the maternal satisfaction, such as the delivery room services, the health of the baby,  
16 the gender of the child, family support, and other psychosocial factors. As satisfaction is a  
17 multi-dimensional and complex feeling, it is difficult to measure with a single tool and to  
18 narrow it down to only the first stage of labour.  
19  
20  
21  
22  
23  
24  
25  
26  
27

28 It is understood that a birthing process is a natural event, especially for low-risk women.  
29 Thus, the management of labour should be in a supportive manner with minimal or no  
30 interferences. This study will provide good-quality evidence on the effects of the combined  
31 BRM for labor pain management. These findings will be important for primigravidae and  
32 their family members during the decision making about labour pain management.  
33  
34  
35  
36  
37  
38  
39

#### 40 **Acknowledgements**

41  
42 The authors would like to acknowledge the assistance provided by Um-Al-Qura  
43 University, the Research Department in the Directorate of Health Affairs, Makkah Region,  
44 and Saudi Arabia Culture Mission in Saudi Arabia.  
45  
46  
47  
48

#### 49 **Author Contributions**

50  
51 KB drafted, formulated, and submitted the manuscript. All authors MHR, AHI, LK & BHC  
52 contributed to the study designs, read, revised, and approved the research protocol critically  
53 for important intellectual content and helped to draft the final manuscript. All authors  
54  
55  
56  
57  
58  
59  
60

1  
2  
3 approved the final manuscript for submission. Authorship eligibility is in accordance with  
4  
5 the International Committee of Medical Journal Editors (ICMJE) guidelines.  
6  
7

### 8 **Funding**

9  
10 This work was supported by the Umm Al-Qura University and Saudi Arabia Culture  
11  
12 Mission (SACM). The author (KB) is a student who owns a Financial Guarantee, which  
13  
14 covers the study and research process. The Financial Guarantee will cover all the research's  
15  
16 payments. The funders will not be involved in the study design, data collection, analysis  
17  
18 and interpretation of the data and writing of the manuscript.  
19  
20

### 21 **Competing Interest**

22  
23  
24 The authors declare that they have no competing interests.  
25  
26

### 27 **Patient Consent for Publication**

28  
29 Not applicable since this is a study protocol.  
30  
31

### 32 **Availability of Data and Materials**

33  
34 The datasets will be available from the corresponding author for reasonable purposes by  
35  
36 healthcare professionals, clinicians or scientists in the related fields. Deidentified and  
37  
38 anonymised participant data for all the outcomes will be shared once the results have been  
39  
40 published and will be made available for as long as possible. Data use will be advised to  
41  
42 refer to the published study protocol and trial register.  
43  
44

### 45 **Ethics Approval and Consent to Participate**

46  
47 Ethics approval has been obtained from the Ethical Committee for Research Involving  
48  
49 Human Subjects of the Ministry of Health in the Saudi Arabia (H-02-K-076-0319-109) on  
50  
51 14/April/2019. Additional administrative approvals will be requested from the medical  
52  
53 director of Makkah Maternity and Children Hospital.  
54  
55  
56  
57  
58  
59  
60

## Reference

1. Gibson E. Women's expectations and experiences with labour pain in medical and midwifery models of birth in the United States. *Women and Birth*. 2014;27:185–9. <https://doi.org/10.1016/j.wombi.2014.05.002>.
2. Beigi NMA, Broumandfar K, Bahadoran P, et al. Women's experience of pain during childbirth. *Iran J Nurs Midwifery Res* 2010;15:77–82.
3. Devilata T, Swarna S. Effectiveness of pre delivery preparation on anxiety among Primigravida mothers at maternal child health centre Tirupati, AP, India. *IOSR J Nurs Heal Sci* 2015;4:19-24. <https://doi.10.9790/1959-04651924>.
4. Aksoy M, Aksoy AN, Dostbil A, et al. The Relationship between Fear of Childbirth and Women ' s Knowledge about Painless Childbirth. *Obstet Gynecol Int* 2014;2014:7. <http://dx.doi.org/10.1155/2014/274303>
5. Nystedt A, Hildingsson I. Diverse definitions of prolonged labour and its consequences with sometimes subsequent inappropriate treatment. *BMC Pregnancy Childbirth* 2014;14:233. <https://doi.org/10.1186/1471-2393-14-233>
6. Hanjani SM, Tourzani ZM, Shoghi M. The Effect of Foot Reflexology on Anxiety , Pain , and Outcomes of the Labor in Primigravida Women. *Acta Med Iran*. 2014;53:507–511.
7. Li W, Zhang H, Ling Y, et al. Effect of prolonged second stage of labor on maternal and neonatal outcomes. *Asian Pac J Trop Med* 2011;4:409–411. [https://doi.org/10.1016/S1995-7645\(11\)60114-4](https://doi.org/10.1016/S1995-7645(11)60114-4)
8. Neal JL, Lamp JM, Buck JS, et al. Outcomes of Nulliparous Women with Spontaneous Labor Onset Admitted to Hospitals in Pre-active versus Active Labor. *J Midwifery*



- 1  
2  
3 *Womens Heal* 2014;59:28–34. doi:10.1111/jmwh.12160.Outcomes  
4  
5  
6 9. Kjærgaard H, Olsen JØRN, Ottesen B, et al. Incidence and outcomes of dystocia in the  
7  
8 active phase of labor in term nulliparous women with spontaneous labor onset. *Acta*  
9  
10 *Obstet Gynecol* 2009;88:402-407. doi:10.1080/00016340902811001  
11  
12 10. Lowe NK. A Review of Factors Associated With Dystocia and Cesarean Section in  
13  
14 Nulliparous Women. *J Midwifery Women's Heal* 2007;52:216–228.  
15  
16 doi:10.1016/j.jmwh.2007.03.003  
17  
18 11. Shields SG, Ratcliffe SD, Fontaine P, et al. Dystocia in nulliparous women. *Am Fam*  
19  
20 *Physician* 2007;75:1671-1678.  
21  
22 12. Garthus-Niegel S, Knoph C, von Soest T, et al. The Role of Labor Pain and Overall  
23  
24 Birth Experience in the Development of Posttraumatic Stress Symptoms: A  
25  
26 Longitudinal Cohort Study. *Birth* 2014;41:108–115. <https://doi.org/10.1111/birt.12093>  
27  
28  
29 13. Peeler S, Stedmon J, Chung MC, et al. Women's experiences of living with postnatal  
30  
31 PTSD. *Midwifery* 2018;56:70–78. <https://doi.org/10.1016/j.midw.2017.09.019>  
32  
33  
34 14. Boryri T, Noori NM, Teimouri A, et al. The perception of primiparous mothers of  
35  
36 comfortable resources in labor pain (a qualitative study). *Iran J Nurs Midwifery Res*  
37  
38 2016;21:239–246. <https://doi.org/10.4103/1735-9066.180386>  
39  
40  
41 15. Størksen HT, Garthus-niegel S, Adams SS, et al. Fear of childbirth and elective  
42  
43 caesarean section : a population-based study. *BMC Pregnancy Childbirth* 2015;15:221.  
44  
45 <https://doi.org/10.1186/s12884-015-0655-4>  
46  
47  
48 16. Stoll KH, Hauck YL, Downe S, et al. Preference for cesarean section in young  
49  
50 nulligravid women in eight OECD countries and implications for reproductive health  
51  
52 education. *Reprod Health* 2017;14:116. <https://doi.org/10.1186/s12978-017-0354-x>  
53  
54  
55  
56  
57  
58  
59  
60

- 1  
2  
3 17. El-Aziz SNA, Mansour SE, Hassan NF. Factors associated with fear of childbirth: It's  
4 effect on women's preference for elective cesarean section. *J Nurs Educ Pract*  
5 2017;7:133–45. <https://doi.org/10.5430/jnep.v7n1p133>.  
6  
7  
8  
9  
10 18. Lowe NK. The Pain and Discomfort of Labor and Birth. *J Obstet Gynecol Neonatal*  
11 *Nurs* 1996;25:82–92. <https://doi.org/10.1111/j.1552-6909.1996.tb02517.x>  
12  
13  
14 19. Rayburn WF, Zuspan FP. Drug therapy in obstetrics and gynecology. 3rd ed. St.  
15 Louis: Mosby; 1992.  
16  
17  
18 20. Ullman R, Smith LA, Burns E, et al. Parenteral opioids for maternal pain management  
19 in labour. *Cochrane Database Syst Rev* 2010;9.  
20 <https://doi.org/10.1002/14651858.CD007396.pub2>  
21  
22  
23 21. Pereira RR, Kanhai H, Rosendaal F, et al. Parenteral Pethidine for labour pain relief  
24 and substance use disorder: 20-year follow-up cohort study in offspring. *BMJ Open*  
25 2012;2:e000719. <http://dx.doi.org/10.1136/bmjopen-2011-000719>  
26  
27  
28 22. Smith LA, Burns E, Cuthbert A. Parenteral opioids for maternal pain management in  
29 labour. *Cochrane Database Syst Rev* 2018;6.  
30 <https://doi.org/10.1002/14651858.CD007396.pub3>  
31  
32  
33 23. Simkin P. Reducing Pain and Enhancing Progress in labor: A Guide to  
34 Nonpharmacologic Methods for Maternity Caregivers. *Birth* 1995;22:161–71.  
35 <https://doi.org/10.1111/j.1523-536X.1995.tb00693.x>  
36  
37  
38 24. Cook A, Wilcox G. Pressuring Pain: Alternative Therap for Labor Pain Management.  
39 *AWHONN Lifelines* 1997;1:36–41. <https://doi.org/10.1111/j.1552-6356.1997.tb00929.x>  
40  
41  
42  
43 25. Jones LV. Non-pharmacological approaches for pain relief during labour can improve  
44  
45  
46  
47  
48  
49  
50  
51  
52  
53  
54  
55  
56  
57  
58  
59  
60

- 1  
2  
3 maternal satisfaction with childbirth and reduce obstetric interventions. *Evid Based*  
4  
5 *Nurs* 2015;18:70. <http://dx.doi.org/10.1136/eb-2014-101938>  
6  
7  
8 26. Busch V, Magerl W, Kern U, et al. The Effect of Deep and Slow Breathing on Pain  
9  
10 Perception , Autonomic Activity , and Mood Processing -An Experimental Study. *Pain*  
11  
12 *Med* 2012;13:215–28. <https://doi.org/10.1111/j.1526-4637.2011.01243.x>  
13  
14  
15 27. Thomas ME, Dhiwar MS. Effectiveness of Patterned Breathing Technique in  
16  
17 Reduction of Pain During First Stage of Labour Among Primigravidas. *Sinhgad E-*  
18  
19 *Journal Nurs* 2011;1:6–8.  
20  
21  
22 28. Kaur K, Rana AK, Gainder S. Effect of video on ‘ Breathing Exercises during labour ’  
23  
24 on Pain Perception and Duration of Labour Among Primigravida Mothers. *Nurs*  
25  
26 *Midwifery Res Journa* 2013;9:1–9.  
27  
28  
29 29. El-refaye GE, El Nahas EM, Ghareeb HO. Effect of kinesio taping therapy combined  
30  
31 with breathing exercises on childbirth duration and labor pain : a randomized controlled  
32  
33 trial. *Bull Fac Phys Ther* 2016;21:23–31. <https://doi.org/10.4103/1110-6611.188026>  
34  
35  
36 30. Chuang LL, Lin LC, Cheng P, et al. Effects of a relaxation training programme on  
37  
38 immediate and prolonged stress responses in women with preterm labour. *J Adv Nurs*  
39  
40 2011;68:170–80. <https://doi.org/10.1111/j.1365-2648.2011.05765.x>  
41  
42  
43 31. Akbarzadeh M, Sharif F, Zare N. The Reduction of Anxiety and Improved Maternal  
44  
45 Attachment to Fetuses and Neonates by Relaxation Training in Primigravida Women.  
46  
47 *Women’s Heal Bull* 2014;1:e18968. <https://doi.org/10.17795/whb-18968>.  
48  
49  
50 32. Nattah FM, Abbas WAK. Assessment of Level of Pain and its Relation with Breathing  
51  
52 Exercise in the First Stage of Labour among Primi Mothers at Hilla Teaching Hospital.  
53  
54 *Eur J Sci Res* 2016;135:121–8.  
55  
56  
57  
58  
59  
60

- 1  
2  
3 33. Yuksel H, Cayir Y, Kosan Z, et al. Effectiveness of breathing exercises during the  
4 second stage of labor on labor pain and duration : a randomized controlled trial. *J Integr*  
5  
6 *Med* 2017;15:456–61. [https://doi.org/10.1016/S2095-4964\(17\)60368-6](https://doi.org/10.1016/S2095-4964(17)60368-6)  
7  
8  
9  
10 34. Mathew AM, Francis F. Effectiveness of Foot Refl exology in Reduction of Labour  
11 Pain among Mothers in Labour Admitted at PSG Hospital, Coimbatore. *Int J Nurs Educ*  
12 2016;8:11–5. <https://doi.org/10.5958/0974-9357.2016.00081.7>  
13  
14  
15  
16 35. Moghimi-Hanjani S, Mehdizadeh-Tourzani Z, Shoghi, M. The effect of foot  
17 reflexology on anxiety, pain, and outcomes of the labor in primigravida women. *Acta*  
18 *Med Iran* 2015;53:507-511.  
19  
20  
21  
22  
23 36. Cohen M. The Effectiveness of Massage Therapy A Summary of Evidence-Based  
24 Research. Melbourne:Australian Associaiton of Massage Therapy;2011.  
25  
26  
27  
28 37. Dolatian M, Hasanpour A, Montazeri S, et al. The effect of reflexology on pain  
29 intensity and duration of labor on primiparas. *Iran Red Crescent Med J* 2011;13:475–  
30 479.  
31  
32  
33  
34 38. Valiani M, Shiran E, Kianpour M, et al. Reviewing the effect of reflexology on the pain  
35 and certain features and outcomes of the labor on the primiparous women. *Iran J Nurs*  
36 *Midwifery Res* 2010;15:302–310.  
37  
38  
39  
40  
41 39. Baljon K, Romli MH, Ismail AH, et al. The Effectiveness Of Complementary And  
42 Alternative Medicine Of Massage And Reflexology In Managing Pain And Anxiety  
43 Among Primigravidas In Labor: A Systematic Review.[in preparation for submission  
44 to a journal]  
45  
46  
47  
48  
49  
50  
51 40. Field T, Hernandez-Rief M, Diego M, et al. Cortisol decreases and serotonin increases  
52 following massage therapy. *J Neurosci* 2005;115:1397–413.  
53  
54  
55  
56  
57  
58  
59  
60

- 1  
2  
3 <https://doi.org/10.1080/00207450590956459>  
4  
5  
6 41. Crowe K, von Baeyer C. Predictors of a Positive Childbirth Experience. *Birth Iss*  
7  
8 *Perinat C* 1989;16:59–63. <https://doi.org/10.1111/j.1523-536X.1989.tb00862.x>  
9  
10 42. Ma X, Yue ZQ, Gong ZQ, et al. The effect of diaphragmatic breathing on attention,  
11  
12 negative affect and stress in healthy adults. *Front Psychol* 2017;8:1–12.  
13  
14 <https://doi.org/10.3389/fpsyg.2017.00874>  
15  
16 43. Bordoni B, Purgol S, Bizzarri A, et al. The Influence of Breathing on the Central  
17  
18 Nervous System. *Cureus* 2018;10:1–8. <https://doi.org/10.7759/cureus.2724>  
19  
20 44. Tiran D, Chummun H. The physiological basis of reflexology and its use as a potential  
21  
22 diagnostic tool. *Complement Ther Clin Pract* 2005;11:58–64.  
23  
24 <https://doi.org/10.1016/j.ctnm.2004.07.007>  
25  
26 45. Tappan FM, Benjamin PJ. Tappan’s handbook for healing massage techniques. Classic,  
27  
28 Holistic, and Emerging Methods. 3rd Ed. Stamford, Conn.: Appleton & Lange.; 1998.  
29  
30 46. Tiran D, Evans M. Theoretical background to structural reflex zone therapy. *Pract.*  
31  
32 *Manag. Pain*; 2010.  
33  
34 47. Embong NH, Soh YC, Ming LC, et al. Revisiting reflexology: Concept, evidence,  
35  
36 current practice, and practitioner training. *J Tradit Complement Med* 2015;5:197–206.  
37  
38 <https://doi.org/10.1016/j.jtcme.2015.08.008>  
39  
40 48. Poole H, Glenn S, Murphy P. A randomised controlled study of reflexology for the  
41  
42 management of chronic low back pain. *Eur J Pain* 2007;11:878–87.  
43  
44 <https://doi.org/10.1016/j.ejpain.2007.01.006>  
45  
46 49. Keet L. Reflexology Bible: The Definitive Guide to Reflexology (Godsfield Bible  
47  
48 Series). First Edit. London, Great Britain: Octopus publishing group; 2008.  
49  
50  
51  
52  
53  
54  
55  
56  
57  
58  
59  
60

- 1  
2  
3 50. Roudaut Y, Lonigro A, Coste B, et al. Touch sense: functional organization and  
4  
5 molecular determinants of mechanosensitive receptors. *Channels* 2012;6:234–45.  
6  
7 <https://doi.org/10.4161/chan.22213>  
8  
9
- 10 51. Goats GC. Massage--the scientific basis of an ancient art: Part 2. Physiological and  
11  
12 therapeutic effects. *Br J Sports Med* 1994;28:153–6.  
13  
14 <http://dx.doi.org/10.1136/bjism.28.3.153>  
15  
16
- 17 52. Basbaum AI, Fields HL. Endogenous pain control mechanisms: Review and  
18  
19 hypothesis. *Ann Neurol* 1978;4:451–62. <http://dx.doi.org/10.1002/ana.410040511>  
20  
21
- 22 53. Weerapong P, Hume PA, Kolt GS. The mechanisms of massage and effects on  
23  
24 performance, muscle recovery and injury prevention. *Sport Med* 2005;35:235–56.  
25  
26 <http://dx.doi.org/10.2165/00007256-200535030-00004>  
27  
28
- 29 54. Vakilian K, Keramat A. The Effect of the Breathing Technique With and Without  
30  
31 Aromatherapy on the Length of the Active Phase and Second Stage of Labor. *Nurs*  
32  
33 *Midwifery Stud* 2013;2. <http://dx.doi.org/10.5812/nms.9886>  
34  
35
- 36 55. Yılar Erkek Z, Aktas S. The Effect of Foot Reflexology on the Anxiety Levels of  
37  
38 Women in Labor. *J Altern Complement Med* 2018;24:352–60.  
39  
40 <https://doi.org/10.1089/acm.2017.0263>  
41  
42
- 43 56. Morhenn V, Beavin LE, Zak PJ. Massage Increases Oxytocin and Reduces  
44  
45 Adrenocorticotropin Hormone in Humans. *Altern Ther* 2012;18:11–8.  
46  
47
- 48 57. Diego MA, Field T. Moderate Pressure Massage Elicits a Parasympathetic Nervous  
49  
50 System Response. *Int J Neurosci* 2009;119:630–8.  
51  
52 <http://dx.doi.org/10.1080/00207450802329605>  
53  
54
- 55 58. McCullough JE, Liddle SD, Sinclair M, et al. The Physiological and Biochemical  
56  
57  
58  
59  
60

- 1  
2  
3 Outcomes Associated with a Reflexology Treatment : A Systematic Review. Evidence-  
4 Based Complementary *Altern Med* 2014;2014. <http://dx.doi.org/10.1155/2014/502123>  
5  
6  
7  
8 59. Mccullough JEM, Liddle SD, Close C, et al. Reflexology: a randomised controlled trial  
9 investigating the effects on beta-endorphin, cortisol and pregnancy related stress.  
10  
11  
12 *Complement Ther Clin Pract* 2018; 31:76–84.  
13  
14  
15 60. Li Q, Becker B, Wernicke J, et al. Foot massage evokes oxytocin release and activation  
16 of orbitofrontal cortex and superior temporal sulcus. *Psychoneuroendocrinology*  
17  
18 2018;101:193–203. <http://dx.doi.org/10.1016/j.psyneuen.2018.11.016>  
19  
20  
21 61. Bell AF, Erickson EN, Carter CS. Beyond Labor: The Role of Natural and Synthetic  
22 Oxytocin in The Transition To Motherhood. *J Midwifery Womens Heal* 2015;59:35–  
23  
24 42. <http://dx.doi.org/10.1111/jmwh.12101>  
25  
26  
27  
28 62. Hu J, Brettle A, Jiang Z, et al. A systematic review and meta-analysis of the effect of  
29 massage therapy in pain relief during labor. *J Nurs* 2017;6:1–14.  
30  
31  
32 <http://dx.doi.org/10.18686/jn.v6i4.130>  
33  
34  
35  
36 63. Huntley AL, Coon JT, Ernst E. Complementary and alternative medicine for labor  
37 pain : A systematic review. *Am J Obstet Gynecol* 2004;191:36–44. <http://dx.doi.org>  
38  
39 10.1016/j.ajog.2003.12.008  
40  
41  
42  
43 64. Ranjbaran M, Khorsandi M, Matourypour P, et al. Effect of Massage Therapy on Labor  
44 Pain Reduction in Primiparous Women A Systematic Review and Meta-analysis of  
45 Randomized Controlled Clinical Trials in Iran. *Iran J Nurs Midwifery Res*  
46  
47 2017;22:257–61.  
48  
49  
50  
51 65. Smith CA, Levett KM, Collins CT, et al. Massage , reflexology and other manual  
52 methods for pain management in labour ( Review ). *Cochrane Database Rev.* 2012.  
53  
54  
55  
56  
57  
58  
59

- 1  
2  
3 66. Kirkham M. *The Midwife-Mother Relationship*. 2nd ed. Hampshire: Red Globe Press;  
4  
5 2000.  
6  
7  
8 67. Levett KM, Smith CA, Bensoussan A, et al. The Complementary Therapies for Labour  
9  
10 and Birth Study: Making sense of labour and birth – experiences of women, partners  
11  
12 and midwives of a complementary medicine antenatal education course. *Midwifery*  
13  
14 2016;40:124–131. <http://dx.doi.org/10.1016/j.midw.2016.06.011>  
15  
16  
17 68. Ministry of Health Saudi Arabia. Maternity and Children Hospital Makkah. 2013.  
18  
19 <http://www.testonsserver.com/mch/> (accessed November 27, 2018).  
20  
21  
22 69. Altaweli RF, McCourt C, Baron M. Childbirth care practices in public sector facilities  
23  
24 in Jeddah, Saudi Arabia: A descriptive study. *Midwifery* 2014;30:899–909.  
25  
26 <http://dx.doi.org/10.1016/j.midw.2014.03.006>  
27  
28  
29 70. Bonnel AM, Boureau F. Labor Pain Assessment : Validity of a Behavioral Index. *Pain*.  
30  
31 1985;22(1):81–90. [https://doi.org/10.1016/0304-3959\(85\)90150-2](https://doi.org/10.1016/0304-3959(85)90150-2)  
32  
33  
34 71. Snyder M, Wieland J. Complementary and alternative therapies : what is their place in  
35  
36 the management of chronic pain? *Nurs Clin North Am* 2003;38:495–508.  
37  
38 [http://dx.doi.org/10.1016/S0029-6465\(02\)00098-1](http://dx.doi.org/10.1016/S0029-6465(02)00098-1)  
39  
40  
41 72. Hayes M, Paterson D. Experimental development of the graphic rating method. *Psychol*  
42  
43 *Bull.* 1921;18:98–9.  
44  
45  
46 73. Whitburn LY, Jones LE, Davey M, et al. The nature of labour pain : An updated review  
47  
48 of the literature. *Women and Birth* 2018;32:28-38.  
49  
50 <http://dx.doi.org/10.1016/j.wombi.2018.03.004>  
51  
52  
53 74. Wei CK, Leng CY, Lin SKS. The use of the Visual Analogue Scale for the assessment  
54  
55 of labour pain: a systematic review. *JBI Database Syst Rev Implement* 2010;8:972–  
56  
57  
58  
59  
60



- 1  
2  
3 1015.  
4  
5  
6 75. Woo AK. Depression and Anxiety in Pain. *Br J Pain* 2010;4:8–12.  
7  
8 <https://doi.org/10.1177/204946371000400103>  
9  
10 76. Brook CA, Schmidt LA. Social anxiety disorder: A review of environmental risk  
11 factors. *Neuropsychiatr Dis Treat* 2008;4:123–43.  
12  
13 77. Chang M, Wang S, Chen C. Effects of massage on pain and anxiety during labour : a  
14 randomized controlled trial in Taiwan. *J Adv Nurs* 2002;38:68-73.  
15  
16 78. Mårtensson L, Bergh I. Effect of treatment for labor pain : Verbal reports versus visual  
17 analogue scale scores - A prospective randomized study. *Int J Nurs Midwifery*  
18 2011;3:43–7.  
19  
20 79. Bahammam MA, Hassan MH. Validity and reliability of an Arabic version of the  
21 modified dental anxiety scale in Saudi adults. *Saudi Med J* 2014;35:1384.  
22 <http://dx.doi.org/10.2466/pr0.1997.80.3.947>  
23  
24 80. Hawker GA, Mian S, Kendzerska T, et al. Measures of adult pain: Visual analog scale  
25 for pain (vas pain), numeric rating scale for pain (nrs pain), mcgill pain questionnaire  
26 (mpq), short-form mcgill pain questionnaire (sf-mpq), chronic pain grade scale (cpgs),  
27 short form-36 bodily pain scale (sf-36 bps), and measure of intermittent and constant  
28 osteoarthritis pain (icoap). *Arthritis Care Res* 2011;63:S240-S252.  
29 [doi:10.1002/acr.20543](https://doi.org/10.1002/acr.20543)  
30  
31 81. Jensen MP, Karoly P, Braver S. The Measurement of Clinical Pain Intensity : a  
32 Comparison of Six Methods. *Pain Res Manag* 1986;27:117–26.  
33 [https://doi.org/10.1016/0304-3959\(86\)90228-9](https://doi.org/10.1016/0304-3959(86)90228-9)  
34  
35 82. Durat G, Çulhacik GD, Doğu Ö, et al. The development of an anxiety assessment scale  
36  
37  
38  
39  
40  
41  
42  
43  
44  
45  
46  
47  
48  
49  
50  
51  
52  
53  
54  
55  
56  
57  
58  
59  
60

1  
2  
3 for pregnant women in labor. *Saudi Med J* 2018;39:609–14.  
4  
5 <http://dx.doi.org/10.15537/smj.2018.6.22266>  
6

7  
8 83. Harvey S, Rach D, Stainton MC, et al. Evaluation of satisfaction with midwifery care.  
9  
10 *Midwifery* 2002;18:260–7. <http://dx.doi.org/10.1054/midw.2002.0317>  
11  
12  
13  
14  
15  
16  
17  
18  
19  
20  
21  
22  
23  
24  
25  
26  
27  
28  
29  
30  
31  
32  
33  
34  
35  
36  
37  
38  
39  
40  
41  
42  
43  
44  
45  
46  
47  
48  
49  
50  
51  
52  
53  
54  
55  
56  
57  
58  
59  
60

**Figure Legend**

Figure 1 Mechanisms of Massage therapy

Figure 2 The CONSORT flow diagram

Figure 3 (a) shows the timeline of outcomes measurement in the intervention group; (b) shows the timeline of outcomes measurement in the control group

Figure 4 Research personnel training and responsibility matrix

For peer review only

1  
2  
3 **Table Legend**  
4  
5

6 Table 1 Steps of the Intervention  
7

8  
9 Table 2 Summary of Primary Outcomes and Measurement Tools  
10

11  
12 Table 3 Summary of Secondary Outcomes and Measurement Tools  
13  
14  
15  
16  
17  
18  
19  
20  
21  
22  
23  
24  
25  
26  
27  
28  
29  
30  
31  
32  
33  
34  
35  
36  
37  
38  
39  
40  
41  
42  
43  
44  
45  
46  
47  
48  
49  
50  
51  
52  
53  
54  
55  
56  
57  
58  
59  
60

**Table 1 Steps of the Intervention**

| <b>Steps</b>                                                          | <b>Process</b>                                                                                                                                                                                 |
|-----------------------------------------------------------------------|------------------------------------------------------------------------------------------------------------------------------------------------------------------------------------------------|
| 1.                                                                    | Prepare the equipment.                                                                                                                                                                         |
| 2.                                                                    | Explain the procedure to the primigravidae & advise her to lay on the left side with a pillow on the side of the stomach.                                                                      |
| <b>Breathing Exercise Intervention for 5 minutes</b>                  |                                                                                                                                                                                                |
| 3.                                                                    | Ask the primigravidae to perform deep breathing slowly through the nose for two seconds and then consciously release the air during breathing out for another two seconds during contractions. |
| 4.                                                                    | Rest for 1-3 seconds then repeat the same technique for a total of 5 minutes.                                                                                                                  |
| <b>Reflexology Intervention Technique for 10 minutes on each foot</b> |                                                                                                                                                                                                |
| 5.                                                                    | Put a towel under the left foot and cover the right leg.                                                                                                                                       |
| 6.                                                                    | Apply warm oil over the left foot and roll it left to right for 5 times.                                                                                                                       |
| 7.                                                                    | Press palms on the Achilles heel and knead the ankle for 5 times.                                                                                                                              |
| 8.                                                                    | Knead the thumb pads on the central and bottom parts of the heel for 5 times.                                                                                                                  |
| 9.                                                                    | Knead the foot following the *CIUW shape on the lateral and intermediate aspects of the foot followed by **MST shape for 5 times.                                                              |
| 10.                                                                   | Press the wooden stick of the reflexology on the toes, forefoot, mid-foot, and hind-foot for 5 times.                                                                                          |
| 11.                                                                   | Repeat Steps 6-11 on the right foot for 5 times.                                                                                                                                               |
| <b>Lower Limbs Massage for 2 minutes 30 seconds on each leg</b>       |                                                                                                                                                                                                |
| 12.                                                                   | Effleurage massage on the flexed leg by using two hands whole lower leg for 3 times.                                                                                                           |
| 13.                                                                   | Half effleurage massage from the heel to the popliteal area for 3 times.                                                                                                                       |
| 14.                                                                   | Palm and thumb kneading on the gastrocnemius muscle over the lateral & medial sides, followed by the scooping on the gastrocnemius, each step for 3 times.                                     |
| 15.                                                                   | Thumb kneading on the hamstring muscle over the medial, intermediate, and lateral sides for 3 times.                                                                                           |
| 16.                                                                   | Repeat Steps 12-17 on the right leg for 3 times.                                                                                                                                               |
| <b>Lower Back Massage for 15 minutes</b>                              |                                                                                                                                                                                                |
| 17.                                                                   | Effleurage massage from the sacrum to the shoulders and deltoids for 3 times.                                                                                                                  |
| 18.                                                                   | Thumb kneading & pressure over the lateral sides of the lumbar area of the spine for 3 times.                                                                                                  |
| 19.                                                                   | Apply fist knuckling motion and thumb kneading on the lower back, side by side, for 3 times.                                                                                                   |
| <b>Upper Back Massage for 15 minutes</b>                              |                                                                                                                                                                                                |
| 20.                                                                   | Effleurage massage followed by palm kneading from the lumbar region to trapezius laterally for 3 times.                                                                                        |

- 1
  - 2
  - 3
  - 4
  - 5
  - 6
  - 7
  - 8
  - 9
  - 10
  - 11
  - 12
  - 13
  - 14
  - 15
  - 16
  - 17
  - 18
  - 19
  - 20
  - 21
  - 22
  - 23
  - 24
  - 25
  - 26
  - 27
  - 28
  - 29
  - 30
  - 31
  - 32
  - 33
  - 34
  - 35
  - 36
  - 37
  - 38
  - 39
  - 40
  - 41
  - 42
  - 43
  - 44
  - 45
  - 46
  - 47
  - 48
  - 49
  - 50
  - 51
  - 52
  - 53
  - 54
  - 55
  - 56
  - 57
  - 58
  - 59
  - 60
- 
21. Thumb kneading over both sides of erector spinae, then draining between the ribs towards the armpit areas for 3 times.
  22. Apply squeeze on the deltoid muscle with draining towards the armpit for 3 times.
  23. Apply finger kneading on trapezius muscle, followed by fist scooping for 3 times.
  24. Finally, press on the neck and shoulder area on both sides for 3 times.

\*CIUW-shape: C-shape; I-shape; U-shape, and W-shape, \*\*MST-shape: M-shape, S-shape, and T-shape.

**Table 2 Summary of Primary Outcomes and Measurement Tools**

| <b>Primary Outcomes</b> | <b>measurement tools</b> | <b>Psychometric tests</b>                                                                                                                                                                                                                                                                        | <b>Method of assessment</b>                                                                                                                                                                                               |
|-------------------------|--------------------------|--------------------------------------------------------------------------------------------------------------------------------------------------------------------------------------------------------------------------------------------------------------------------------------------------|---------------------------------------------------------------------------------------------------------------------------------------------------------------------------------------------------------------------------|
| <b>Pain</b>             | PBI                      | -100% inter-rater reliability<br>- <i>r</i> coefficient was 0.45, 0.50,<br>and 0.44 between PBI and PPI.<br><sup>70,77</sup>                                                                                                                                                                     | -assessor-rated <sup>70</sup><br>-five-category<br>behavioural<br>observation scale                                                                                                                                       |
|                         | VAS                      | -moderate correlation ( <i>r</i> = 0.54)<br>with the verbal rating and is<br>considered valuable when mixed<br>with other tools<br><sup>78,79</sup><br>- 0.97 intraclass correlation<br>coefficient of 24 hours interval<br>test-retest reliability <sup>80</sup>                                | - self-reported VAS <sup>72</sup><br>- contains six different<br>coloured parts<br>anchored by two<br>extremes of 'no pain'<br>and excruciating pain<br>- to mark on the line-<br>map by primigravidae<br><sup>81</sup> . |
| <b>Anxiety</b>          | ASPWL                    | - > 0.8 concordance test content<br>validity index<br>-Kendall's W<br>between the opinions of the<br>experts ( <i>W</i> = 0.090; <i>P</i> = 0.080)<br>with Cronbach's alpha level of<br>0.77 <sup>82</sup> .<br>significantly correlated ( <i>r</i> =<br>0.369) Beck Anxiety Scale <sup>82</sup> | -questionnaire<br>consists of nine items<br><sup>82</sup><br>- a 5-point scale and<br>the higher the mean<br>score the more anxiety                                                                                       |

**Table 3 Summary of Secondary Outcomes and Measurement Tools**

| <b>Secondary outcomes</b>              | <b>Measurement tools</b>                  | <b>Method of assessment</b>                                                                                                                         |
|----------------------------------------|-------------------------------------------|-----------------------------------------------------------------------------------------------------------------------------------------------------|
| <b>Maternal stress hormones level,</b> | Blood sample for ACTH, cortisol, oxytocin | Blood sample will be drawn from the median cubital vein during the insertion of IV cannula (routine care)                                           |
| <b>Duration of labour,</b>             | Partograph                                | Partograph at two separate time intervals, a sum of labour duration from 3 to 6 cm of cervical dilatation and from 6 cm to delivery of the placenta |
| <b>Maternal satisfaction,</b>          | SSQ <sup>83</sup>                         | Self-reported 7-point scale (1-7) from “strongly disagree to “strongly agree” with higher scores signifying the higher level of satisfaction        |
| <b>Maternal VS</b>                     | Thermometer<br>Sphygmomanometer           | Recorded on the vital sign monitoring chart and cardiocotograph (CTG)                                                                               |
| <b>FHR</b>                             |                                           | Recorded on the vital sign monitoring chart and cardiocotograph (CTG)                                                                               |
| <b>Neonatal Apgar score</b>            | Apgar score table                         | Taken from the delivery room medical record                                                                                                         |



1  
2  
3  
4 **Figure Legend**  
5

6  
7 Figure 1 Mechanisms of Massage therapy  
8

9  
10 Figure 2 The CONSORT flow diagram  
11

12  
13 Figure 3 (a) shows the timeline of outcomes measurement in the intervention group; (b) shows  
14 the timeline of outcomes measurement in the control group  
15

16  
17  
18 Figure 4 Research personnel training and responsibility matrix  
19  
20  
21  
22  
23  
24  
25  
26  
27  
28  
29  
30  
31  
32  
33  
34  
35  
36  
37  
38  
39  
40  
41  
42  
43  
44  
45  
46  
47  
48  
49  
50  
51  
52  
53  
54  
55  
56  
57  
58  
59  
60

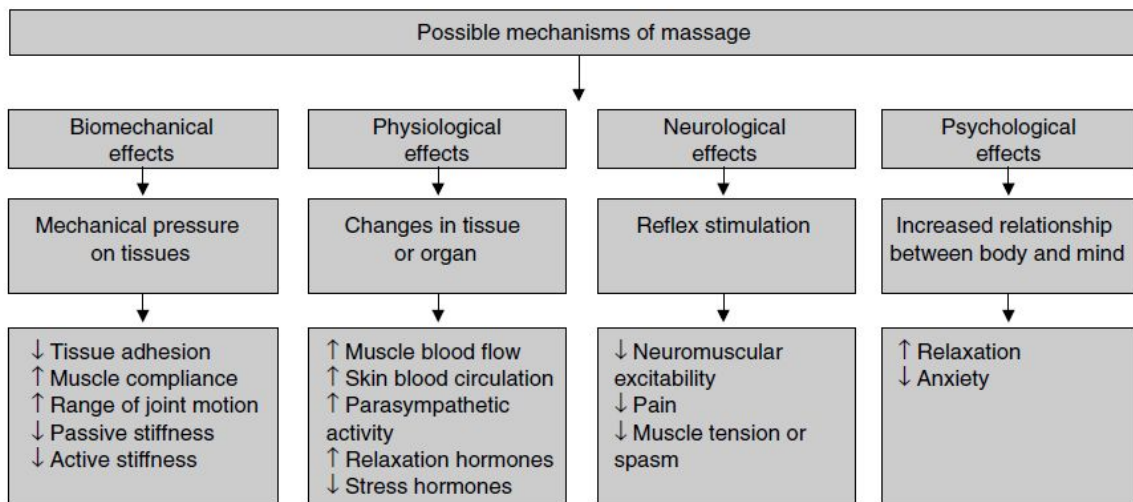

**Figure 1 Mechanisms of Massage therapy**

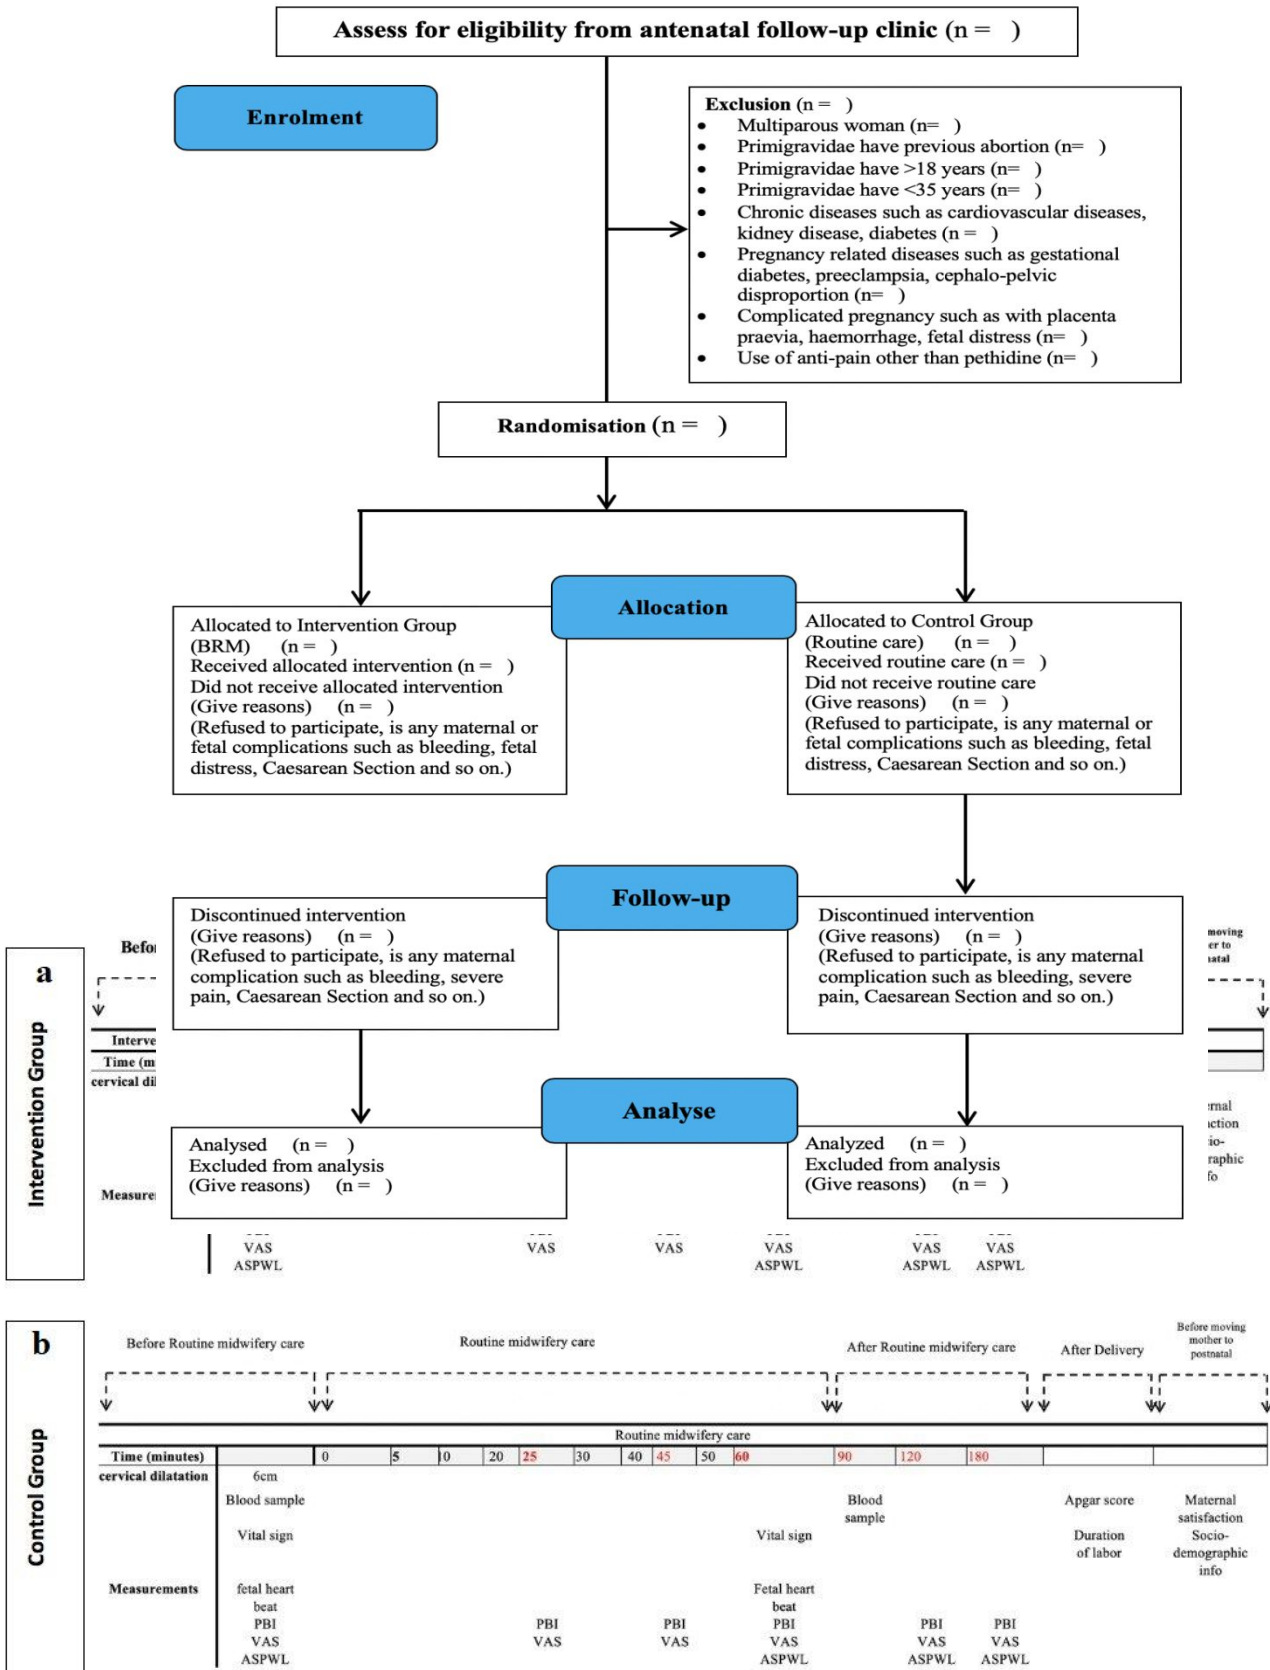

### 13 Research Assistants + 1 Principal Investigator

- Recruitment of nursing students who completed a 5-year nursing degree training and awaiting their job posting,
- Assigned to their preferred and suitable roles (coordinators, the outcome assessors, or masseuses),
- One week training as research assistants in their respective roles,
- A pilot study to ensure their competency,
- Written study manual as a reference guide to be provided to all research assistants.

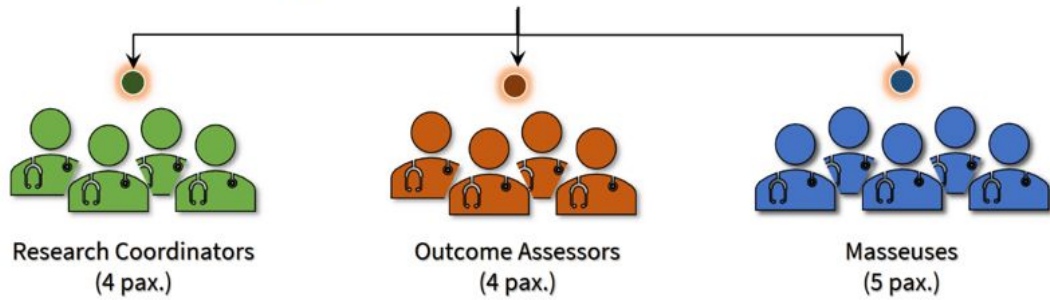

Figure the tim

|                                                                                                                                                                                                                                                                                                                                                                                                                                                                                                                                                                                                                                                                                                                                                                                                                 |                                                                                                                                                                                                                                                                                                                                                                                                                                                                                                                                                                                                          |                                                                                                                                                                                                                                                                                                                                           |
|-----------------------------------------------------------------------------------------------------------------------------------------------------------------------------------------------------------------------------------------------------------------------------------------------------------------------------------------------------------------------------------------------------------------------------------------------------------------------------------------------------------------------------------------------------------------------------------------------------------------------------------------------------------------------------------------------------------------------------------------------------------------------------------------------------------------|----------------------------------------------------------------------------------------------------------------------------------------------------------------------------------------------------------------------------------------------------------------------------------------------------------------------------------------------------------------------------------------------------------------------------------------------------------------------------------------------------------------------------------------------------------------------------------------------------------|-------------------------------------------------------------------------------------------------------------------------------------------------------------------------------------------------------------------------------------------------------------------------------------------------------------------------------------------|
| <ul style="list-style-type: none"> <li>• Recruit eligible primigravidae at the antenatal clinic deliver brief health education on labour pain management at the antenatal clinic for 6 weeks,</li> <li>• Reassess the primigravidae women's consent and eligibility,</li> <li>• Allocate the women to either the intervention or control group,</li> <li>• Alert the masseuses and outcome assessors when the cervical dilatation of the trial participant reaches 6 cm,</li> <li>• Distribute outcomes assessment record form to the outcome assessors,</li> <li>• Encode the questionnaire package according to the participant's allocated group,</li> <li>• Organise the entry sequence for the outcome assessors and the masseuses to enter the delivery rooms according to the scheduled time.</li> </ul> | <ul style="list-style-type: none"> <li>• Assess and fill-up questionnaires:                             <ol style="list-style-type: none"> <li>1. Present behavioural Intensity (PBI),</li> <li>2. Visual Analog Scale (VAS),</li> <li>3. Anxiety Assessment Scale for primigravidae Women in labour (AASPWL),</li> <li>4. Six Simple Questions (SSQ) for maternal satisfaction.</li> </ol> </li> <li>• Retrieve the maternal vital signs, duration of labour, fetal heart rate, and neonatal Apgar score from the health records,</li> <li>• Record all the outcomes in the designated form.</li> </ul> | <ul style="list-style-type: none"> <li>• Perform breathing exercise, foot reflexology and back massage during labour (BRM).                             <ol style="list-style-type: none"> <li>1. Breathing exercise (5min),</li> <li>2. Foot Reflexology (10 min in each foot),</li> <li>3. Back massage (35min).</li> </ol> </li> </ul> |
|-----------------------------------------------------------------------------------------------------------------------------------------------------------------------------------------------------------------------------------------------------------------------------------------------------------------------------------------------------------------------------------------------------------------------------------------------------------------------------------------------------------------------------------------------------------------------------------------------------------------------------------------------------------------------------------------------------------------------------------------------------------------------------------------------------------------|----------------------------------------------------------------------------------------------------------------------------------------------------------------------------------------------------------------------------------------------------------------------------------------------------------------------------------------------------------------------------------------------------------------------------------------------------------------------------------------------------------------------------------------------------------------------------------------------------------|-------------------------------------------------------------------------------------------------------------------------------------------------------------------------------------------------------------------------------------------------------------------------------------------------------------------------------------------|

Sub-divided into two shifts per day to ensure all the eligible and consented primigravidae will be captured

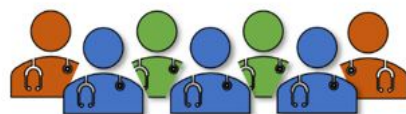

Day Shift (9 am – 9 pm)

2 Coordinators, 3 Masseuses, and 2 Outcome Assessors

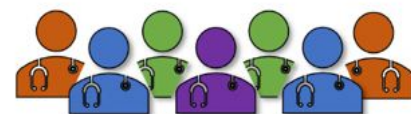

Night Shift (9 pm – 9 am)

2 Coordinators, 2 Masseuses, 2 Outcome Assessors, and Principal Investigator

1  
2  
3  
4  
5  
6  
7  
8  
9  
10  
11  
12  
13  
14  
15  
16  
17  
18  
19  
20  
21  
22  
23  
24  
25  
26  
27  
28  
29  
30  
31  
32  
33  
34  
35  
36  
37  
38  
39  
40  
41  
42  
43  
44  
45  
46  
47  
48  
49  
50  
51  
52  
53  
54  
55  
56  
57  
58  
59  
60

**Figure 4** Research personnel training and responsibility matrix

For peer review only

# Reporting checklist for protocol of a clinical trial.

Based on the SPIRIT guidelines.

## Instructions to authors

Complete this checklist by entering the page numbers from your manuscript where readers will find each of the items listed below.

Your article may not currently address all the items on the checklist. Please modify your text to include the missing information. If you are certain that an item does not apply, please write "n/a" and provide a short explanation.

Upload your completed checklist as an extra file when you submit to a journal.

In your methods section, say that you used the SPIRIT reporting guidelines, and cite them as:

Chan A-W, Tetzlaff JM, Altman DG, Laupacis A, Gøtzsche PC, Krleža-Jerić K, Hróbjartsson A, Mann H, Dickersin K, Berlin J, Doré C, Parulekar W, Summerskill W, Groves T, Schulz K, Sox H, Rockhold FW, Rennie D, Moher D. SPIRIT 2013 Statement: Defining standard protocol items for clinical trials. *Ann Intern Med.* 2013;158(3):200-207

|                                   | Reporting Item                                                                                                         | Page Number |
|-----------------------------------|------------------------------------------------------------------------------------------------------------------------|-------------|
| <b>Administrative information</b> |                                                                                                                        |             |
| Title                             | <u>#1</u> Descriptive title identifying the study design, population, interventions, and, if applicable, trial acronym | 1           |

|    |                     |                     |                                                        |      |
|----|---------------------|---------------------|--------------------------------------------------------|------|
| 1  | Trial registration  | <a href="#">#2a</a> | Trial identifier and registry name. If not yet         | 3    |
| 2  |                     |                     | registered, name of intended registry                  |      |
| 3  |                     |                     |                                                        |      |
| 4  |                     |                     |                                                        |      |
| 5  |                     |                     |                                                        |      |
| 6  | Trial registration: | <a href="#">#2b</a> | All items from the World Health Organization Trial     | 4    |
| 7  |                     |                     | Registration Data Set                                  |      |
| 8  | data set            |                     |                                                        |      |
| 9  |                     |                     |                                                        |      |
| 10 |                     |                     |                                                        |      |
| 11 |                     |                     |                                                        |      |
| 12 | Protocol version    | <a href="#">#3</a>  | Date and version identifier                            | 4    |
| 13 |                     |                     |                                                        |      |
| 14 |                     |                     |                                                        |      |
| 15 | Funding             | <a href="#">#4</a>  | Sources and types of financial, material, and other    | 20   |
| 16 |                     |                     | support                                                |      |
| 17 |                     |                     |                                                        |      |
| 18 |                     |                     |                                                        |      |
| 19 |                     |                     |                                                        |      |
| 20 | Roles and           | <a href="#">#5a</a> | Names, affiliations, and roles of protocol             | 20   |
| 21 |                     |                     | contributors                                           |      |
| 22 | responsibilities:   |                     |                                                        |      |
| 23 |                     |                     |                                                        |      |
| 24 | contributorship     |                     |                                                        |      |
| 25 |                     |                     |                                                        |      |
| 26 |                     |                     |                                                        |      |
| 27 |                     |                     |                                                        |      |
| 28 | Roles and           | <a href="#">#5b</a> | Name and contact information for the trial sponsor     | 1,20 |
| 29 |                     |                     |                                                        |      |
| 30 | responsibilities:   |                     |                                                        |      |
| 31 |                     |                     |                                                        |      |
| 32 | sponsor contact     |                     |                                                        |      |
| 33 |                     |                     |                                                        |      |
| 34 | information         |                     |                                                        |      |
| 35 |                     |                     |                                                        |      |
| 36 |                     |                     |                                                        |      |
| 37 |                     |                     |                                                        |      |
| 38 | Roles and           | <a href="#">#5c</a> | Role of study sponsor and funders, if any, in study    | 20   |
| 39 |                     |                     | design; collection, management, analysis, and          |      |
| 40 | responsibilities:   |                     | interpretation of data; writing of the report; and the |      |
| 41 |                     |                     | decision to submit the report for publication,         |      |
| 42 | sponsor and funder  |                     | including whether they will have ultimate authority    |      |
| 43 |                     |                     | over any of these activities                           |      |
| 44 |                     |                     |                                                        |      |
| 45 |                     |                     |                                                        |      |
| 46 |                     |                     |                                                        |      |
| 47 |                     |                     |                                                        |      |
| 48 |                     |                     |                                                        |      |
| 49 |                     |                     |                                                        |      |
| 50 |                     |                     |                                                        |      |
| 51 |                     |                     |                                                        |      |
| 52 | Roles and           | <a href="#">#5d</a> | Composition, roles, and responsibilities of the        | N/A  |
| 53 |                     |                     | coordinating centre, steering committee, endpoint      |      |
| 54 | responsibilities:   |                     | adjudication committee, data management team,          |      |
| 55 |                     |                     |                                                        |      |
| 56 | committees          |                     |                                                        |      |
| 57 |                     |                     |                                                        |      |
| 58 |                     |                     |                                                        |      |
| 59 |                     |                     |                                                        |      |
| 60 |                     |                     |                                                        |      |

and other individuals or groups overseeing the trial,  
 if applicable (see Item 21a for data monitoring  
 committee)

## Introduction

|                                                       |                     |                                                                                                                                                                                                            |      |
|-------------------------------------------------------|---------------------|------------------------------------------------------------------------------------------------------------------------------------------------------------------------------------------------------------|------|
| Background and<br>rationale                           | <a href="#">#6a</a> | Description of research question and justification for undertaking the trial, including summary of relevant studies (published and unpublished) examining benefits and harms for each intervention         | 4,5  |
| Background and<br>rationale: choice of<br>comparators | <a href="#">#6b</a> | Explanation for choice of comparators                                                                                                                                                                      | 5    |
| Objectives                                            | <a href="#">#7</a>  | Specific objectives or hypotheses                                                                                                                                                                          | 8    |
| Trial design                                          | <a href="#">#8</a>  | Description of trial design including type of trial (eg, parallel group, crossover, factorial, single group), allocation ratio, and framework (eg, superiority, equivalence, non-inferiority, exploratory) | 9,11 |

## Methods:

### Participants, interventions, and outcomes

|               |                    |                                                                                                          |   |
|---------------|--------------------|----------------------------------------------------------------------------------------------------------|---|
| Study setting | <a href="#">#9</a> | Description of study settings (eg, community clinic, academic hospital) and list of countries where data | 9 |
|---------------|--------------------|----------------------------------------------------------------------------------------------------------|---|



|    |                      |                                                                             |                 |
|----|----------------------|-----------------------------------------------------------------------------|-----------------|
| 1  |                      | will be collected. Reference to where list of study                         |                 |
| 2  |                      | sites can be obtained                                                       |                 |
| 3  |                      |                                                                             |                 |
| 4  |                      |                                                                             |                 |
| 5  |                      |                                                                             |                 |
| 6  | Eligibility criteria | <a href="#">#10</a> Inclusion and exclusion criteria for participants. If   | 9,10            |
| 7  |                      | applicable, eligibility criteria for study centres and                      |                 |
| 8  |                      | individuals who will perform the interventions (eg,                         |                 |
| 9  |                      | surgeons, psychotherapists)                                                 |                 |
| 10 |                      |                                                                             |                 |
| 11 |                      |                                                                             |                 |
| 12 |                      |                                                                             |                 |
| 13 |                      |                                                                             |                 |
| 14 |                      |                                                                             |                 |
| 15 |                      |                                                                             |                 |
| 16 | Interventions:       | <a href="#">#11a</a> Interventions for each group with sufficient detail to | 12, Table 1     |
| 17 | description          | allow replication, including how and when they will                         |                 |
| 18 |                      | be administered                                                             |                 |
| 19 |                      |                                                                             |                 |
| 20 |                      |                                                                             |                 |
| 21 |                      |                                                                             |                 |
| 22 |                      |                                                                             |                 |
| 23 | Interventions:       | <a href="#">#11b</a> Criteria for discontinuing or modifying allocated      | N/A             |
| 24 | modifications        | interventions for a given trial participant (eg, drug                       |                 |
| 25 |                      | dose change in response to harms, participant                               |                 |
| 26 |                      | request, or improving / worsening disease)                                  |                 |
| 27 |                      |                                                                             |                 |
| 28 |                      |                                                                             |                 |
| 29 |                      |                                                                             |                 |
| 30 |                      |                                                                             |                 |
| 31 |                      |                                                                             |                 |
| 32 |                      |                                                                             |                 |
| 33 | Interventions:       | <a href="#">#11c</a> Strategies to improve adherence to intervention        | N/A             |
| 34 | adherence            | protocols, and any procedures for monitoring                                |                 |
| 35 |                      | adherence (eg, drug tablet return; laboratory tests)                        |                 |
| 36 |                      |                                                                             |                 |
| 37 |                      |                                                                             |                 |
| 38 |                      |                                                                             |                 |
| 39 |                      |                                                                             |                 |
| 40 |                      |                                                                             |                 |
| 41 | Interventions:       | <a href="#">#11d</a> Relevant concomitant care and interventions that       | 9,10            |
| 42 | concomitant care     | are permitted or prohibited during the trial                                |                 |
| 43 |                      |                                                                             |                 |
| 44 |                      |                                                                             |                 |
| 45 |                      |                                                                             |                 |
| 46 | Outcomes             | <a href="#">#12</a> Primary, secondary, and other outcomes, including       | 13,14, table 2, |
| 47 |                      | the specific measurement variable (eg, systolic                             | 3               |
| 48 |                      | blood pressure), analysis metric (eg, change from                           |                 |
| 49 |                      | baseline, final value, time to event), method of                            |                 |
| 50 |                      | aggregation (eg, median, proportion), and time point                        |                 |
| 51 |                      | for each outcome. Explanation of the clinical                               |                 |
| 52 |                      |                                                                             |                 |
| 53 |                      |                                                                             |                 |
| 54 |                      |                                                                             |                 |
| 55 |                      |                                                                             |                 |
| 56 |                      |                                                                             |                 |
| 57 |                      |                                                                             |                 |
| 58 |                      |                                                                             |                 |
| 59 |                      |                                                                             |                 |
| 60 |                      |                                                                             |                 |

1 relevance of chosen efficacy and harm outcomes is  
 2  
 3 strongly recommended  
 4

5  
 6 Participant timeline [#13](#) Time schedule of enrolment, interventions (including Figure 3a, 3b  
 7 any run-ins and washouts), assessments, and visits  
 8 for participants. A schematic diagram is highly  
 9 recommended (see Figure)  
 10  
 11  
 12  
 13

14  
 15 Sample size [#14](#) Estimated number of participants needed to achieve 15  
 16 study objectives and how it was determined,  
 17 including clinical and statistical assumptions  
 18 supporting any sample size calculations  
 19  
 20  
 21  
 22  
 23  
 24

25 Recruitment [#15](#) Strategies for achieving adequate participant 10,11  
 26 enrolment to reach target sample size  
 27  
 28  
 29  
 30

### 31 Methods:

#### 32 Assignment of 33 interventions (for 34 controlled trials)

35 Allocation: [#16a](#) Method of generating the allocation sequence (eg, 11  
 36 sequence computer-generated random numbers), and list of  
 37 generation any factors for stratification. To reduce predictability  
 38 of a random sequence, details of any planned  
 39 restriction (eg, blocking) should be provided in a  
 40 separate document that is unavailable to those who  
 41 enrol participants or assign interventions  
 42  
 43  
 44  
 45  
 46  
 47  
 48  
 49  
 50  
 51  
 52  
 53  
 54  
 55  
 56  
 57  
 58  
 59  
 60

|    |                        |                      |                                                        |             |
|----|------------------------|----------------------|--------------------------------------------------------|-------------|
| 1  | Allocation             | <a href="#">#16b</a> | Mechanism of implementing the allocation sequence      | 11,12       |
| 2  |                        |                      |                                                        |             |
| 3  | concealment            |                      | (eg, central telephone; sequentially numbered,         |             |
| 4  |                        |                      |                                                        |             |
| 5  | mechanism              |                      | opaque, sealed envelopes), describing any steps to     |             |
| 6  |                        |                      |                                                        |             |
| 7  |                        |                      |                                                        |             |
| 8  |                        |                      | conceal the sequence until interventions are           |             |
| 9  |                        |                      |                                                        |             |
| 10 |                        |                      | assigned                                               |             |
| 11 |                        |                      |                                                        |             |
| 12 |                        |                      |                                                        |             |
| 13 | Allocation:            | <a href="#">#16c</a> | Who will generate the allocation sequence, who will    | Figure 4    |
| 14 |                        |                      |                                                        |             |
| 15 | implementation         |                      | enrol participants, and who will assign participants   |             |
| 16 |                        |                      |                                                        |             |
| 17 |                        |                      | to interventions                                       |             |
| 18 |                        |                      |                                                        |             |
| 19 |                        |                      |                                                        |             |
| 20 |                        |                      |                                                        |             |
| 21 | Blinding (masking)     | <a href="#">#17a</a> | Who will be blinded after assignment to                | 12,17       |
| 22 |                        |                      |                                                        |             |
| 23 |                        |                      | interventions (eg, trial participants, care providers, |             |
| 24 |                        |                      |                                                        |             |
| 25 |                        |                      | outcome assessors, data analysts), and how             |             |
| 26 |                        |                      |                                                        |             |
| 27 |                        |                      |                                                        |             |
| 28 | Blinding (masking):    | <a href="#">#17b</a> | If blinded, circumstances under which unblinding is    | N/A         |
| 29 |                        |                      |                                                        |             |
| 30 | emergency              |                      | permissible, and procedure for revealing a             |             |
| 31 |                        |                      |                                                        |             |
| 32 | unblinding             |                      | participant's allocated intervention during the trial  |             |
| 33 |                        |                      |                                                        |             |
| 34 |                        |                      |                                                        |             |
| 35 |                        |                      |                                                        |             |
| 36 | <b>Methods: Data</b>   |                      |                                                        |             |
| 37 |                        |                      |                                                        |             |
| 38 | <b>collection,</b>     |                      |                                                        |             |
| 39 |                        |                      |                                                        |             |
| 40 | <b>management, and</b> |                      |                                                        |             |
| 41 |                        |                      |                                                        |             |
| 42 | <b>analysis</b>        |                      |                                                        |             |
| 43 |                        |                      |                                                        |             |
| 44 |                        |                      |                                                        |             |
| 45 |                        |                      |                                                        |             |
| 46 | Data collection plan   | <a href="#">#18a</a> | Plans for assessment and collection of outcome,        | 12,Figure 4 |
| 47 |                        |                      |                                                        |             |
| 48 |                        |                      | baseline, and other trial data, including any related  |             |
| 49 |                        |                      |                                                        |             |
| 50 |                        |                      | processes to promote data quality (eg, duplicate       |             |
| 51 |                        |                      |                                                        |             |
| 52 |                        |                      | measurements, training of assessors) and a             |             |
| 53 |                        |                      |                                                        |             |
| 54 |                        |                      | description of study instruments (eg, questionnaires,  |             |
| 55 |                        |                      |                                                        |             |
| 56 |                        |                      | laboratory tests) along with their reliability and     |             |
| 57 |                        |                      |                                                        |             |
| 58 |                        |                      |                                                        |             |
| 59 |                        |                      |                                                        |             |
| 60 |                        |                      |                                                        |             |

|    |                                             |                                                           |               |
|----|---------------------------------------------|-----------------------------------------------------------|---------------|
| 1  |                                             | validity, if known. Reference to where data collection    |               |
| 2  |                                             | forms can be found, if not in the protocol                |               |
| 3  |                                             |                                                           |               |
| 4  |                                             |                                                           |               |
| 5  |                                             |                                                           |               |
| 6  | Data collection plan: <a href="#">#18b</a>  | Plans to promote participant retention and complete       | N/A           |
| 7  |                                             |                                                           |               |
| 8  | retention                                   | follow-up, including list of any outcome data to be       |               |
| 9  |                                             | collected for participants who discontinue or deviate     |               |
| 10 |                                             | from intervention protocols                               |               |
| 11 |                                             |                                                           |               |
| 12 |                                             |                                                           |               |
| 13 |                                             |                                                           |               |
| 14 |                                             |                                                           |               |
| 15 |                                             |                                                           |               |
| 16 | Data management <a href="#">#19</a>         | Plans for data entry, coding, security, and storage,      | 15            |
| 17 |                                             | including any related processes to promote data           |               |
| 18 |                                             | quality (eg, double data entry; range checks for data     |               |
| 19 |                                             | values). Reference to where details of data               |               |
| 20 |                                             | management procedures can be found, if not in the         |               |
| 21 |                                             | protocol                                                  |               |
| 22 |                                             |                                                           |               |
| 23 |                                             |                                                           |               |
| 24 |                                             |                                                           |               |
| 25 |                                             |                                                           |               |
| 26 |                                             |                                                           |               |
| 27 |                                             |                                                           |               |
| 28 |                                             |                                                           |               |
| 29 |                                             |                                                           |               |
| 30 | Statistics: outcomes <a href="#">#20a</a>   | Statistical methods for analysing primary and             | 15,16         |
| 31 |                                             | secondary outcomes. Reference to where other              |               |
| 32 |                                             | details of the statistical analysis plan can be found, if |               |
| 33 |                                             | not in the protocol                                       |               |
| 34 |                                             |                                                           |               |
| 35 |                                             |                                                           |               |
| 36 |                                             |                                                           |               |
| 37 |                                             |                                                           |               |
| 38 |                                             |                                                           |               |
| 39 |                                             |                                                           |               |
| 40 | Statistics: additional <a href="#">#20b</a> | Methods for any additional analyses (eg, subgroup         | 16            |
| 41 |                                             | and adjusted analyses)                                    |               |
| 42 | analyses                                    |                                                           |               |
| 43 |                                             |                                                           |               |
| 44 |                                             |                                                           |               |
| 45 | Statistics: analysis <a href="#">#20c</a>   | Definition of analysis population relating to protocol    | Not mentioned |
| 46 |                                             |                                                           |               |
| 47 | population and                              | non-adherence (eg, as randomised analysis), and           |               |
| 48 |                                             | any statistical methods to handle missing data (eg,       |               |
| 49 | missing data                                | multiple imputation)                                      |               |
| 50 |                                             |                                                           |               |
| 51 |                                             |                                                           |               |
| 52 |                                             |                                                           |               |
| 53 |                                             |                                                           |               |
| 54 |                                             |                                                           |               |
| 55 | <b>Methods: Monitoring</b>                  |                                                           |               |
| 56 |                                             |                                                           |               |
| 57 |                                             |                                                           |               |
| 58 |                                             |                                                           |               |
| 59 |                                             |                                                           |               |
| 60 |                                             |                                                           |               |

|    |                      |                      |                                                          |                |
|----|----------------------|----------------------|----------------------------------------------------------|----------------|
| 1  | Data monitoring:     | <a href="#">#21a</a> | Composition of data monitoring committee (DMC);          | 22             |
| 2  |                      |                      |                                                          |                |
| 3  | formal committee     |                      | summary of its role and reporting structure;             |                |
| 4  |                      |                      |                                                          |                |
| 5  |                      |                      | statement of whether it is independent from the          |                |
| 6  |                      |                      |                                                          |                |
| 7  |                      |                      | sponsor and competing interests; and reference to        |                |
| 8  |                      |                      |                                                          |                |
| 9  |                      |                      | where further details about its charter can be found,    |                |
| 10 |                      |                      |                                                          |                |
| 11 |                      |                      | if not in the protocol. Alternatively, an explanation of |                |
| 12 |                      |                      |                                                          |                |
| 13 |                      |                      | why a DMC is not needed                                  |                |
| 14 |                      |                      |                                                          |                |
| 15 |                      |                      |                                                          |                |
| 16 |                      |                      |                                                          |                |
| 17 |                      |                      |                                                          |                |
| 18 | Data monitoring:     | <a href="#">#21b</a> | Description of any interim analyses and stopping         | N/A            |
| 19 |                      |                      |                                                          |                |
| 20 | interim analysis     |                      | guidelines, including who will have access to these      |                |
| 21 |                      |                      |                                                          |                |
| 22 |                      |                      | interim results and make the final decision to           |                |
| 23 |                      |                      |                                                          |                |
| 24 |                      |                      | terminate the trial                                      |                |
| 25 |                      |                      |                                                          |                |
| 26 |                      |                      |                                                          |                |
| 27 |                      |                      |                                                          |                |
| 28 | Harms                | <a href="#">#22</a>  | Plans for collecting, assessing, reporting, and          | N/A(no sever   |
| 29 |                      |                      |                                                          |                |
| 30 |                      |                      | managing solicited and spontaneously reported            | adverse        |
| 31 |                      |                      |                                                          |                |
| 32 |                      |                      | adverse events and other unintended effects of trial     | effects of BRM |
| 33 |                      |                      |                                                          |                |
| 34 |                      |                      | interventions or trial conduct                           | recorded)      |
| 35 |                      |                      |                                                          |                |
| 36 |                      |                      |                                                          |                |
| 37 |                      |                      |                                                          |                |
| 38 | Auditing             | <a href="#">#23</a>  | Frequency and procedures for auditing trial conduct,     | N/A            |
| 39 |                      |                      |                                                          |                |
| 40 |                      |                      | if any, and whether the process will be independent      |                |
| 41 |                      |                      |                                                          |                |
| 42 |                      |                      | from investigators and the sponsor                       |                |
| 43 |                      |                      |                                                          |                |
| 44 |                      |                      |                                                          |                |
| 45 | <b>Ethics and</b>    |                      |                                                          |                |
| 46 |                      |                      |                                                          |                |
| 47 | <b>dissemination</b> |                      |                                                          |                |
| 48 |                      |                      |                                                          |                |
| 49 |                      |                      |                                                          |                |
| 50 |                      |                      |                                                          |                |
| 51 | Research ethics      | <a href="#">#24</a>  | Plans for seeking research ethics committee /            | 2, 3, 21       |
| 52 |                      |                      |                                                          |                |
| 53 | approval             |                      | institutional review board (REC / IRB) approval          |                |
| 54 |                      |                      |                                                          |                |
| 55 |                      |                      |                                                          |                |
| 56 |                      |                      |                                                          |                |
| 57 |                      |                      |                                                          |                |
| 58 |                      |                      |                                                          |                |
| 59 |                      |                      |                                                          |                |
| 60 |                      |                      |                                                          |                |

|    |                    |                      |                                                         |      |
|----|--------------------|----------------------|---------------------------------------------------------|------|
| 1  | Protocol           | <a href="#">#25</a>  | Plans for communicating important protocol              | 2,21 |
| 2  |                    |                      |                                                         |      |
| 3  | amendments         |                      | modifications (eg, changes to eligibility criteria,     |      |
| 4  |                    |                      | outcomes, analyses) to relevant parties (eg,            |      |
| 5  |                    |                      | investigators, REC / IRBs, trial participants, trial    |      |
| 6  |                    |                      | registries, journals, regulators)                       |      |
| 7  |                    |                      |                                                         |      |
| 8  |                    |                      |                                                         |      |
| 9  |                    |                      |                                                         |      |
| 10 |                    |                      |                                                         |      |
| 11 |                    |                      |                                                         |      |
| 12 |                    |                      |                                                         |      |
| 13 | Consent or assent  | <a href="#">#26a</a> | Who will obtain informed consent or assent from         | 3,11 |
| 14 |                    |                      | potential trial participants or authorised surrogates,  |      |
| 15 |                    |                      | and how (see Item 32)                                   |      |
| 16 |                    |                      |                                                         |      |
| 17 |                    |                      |                                                         |      |
| 18 |                    |                      |                                                         |      |
| 19 |                    |                      |                                                         |      |
| 20 |                    |                      |                                                         |      |
| 21 | Consent or assent: | <a href="#">#26b</a> | Additional consent provisions for collection and use    | N/A  |
| 22 | ancillary studies  |                      | of participant data and biological specimens in         |      |
| 23 |                    |                      | ancillary studies, if applicable                        |      |
| 24 |                    |                      |                                                         |      |
| 25 |                    |                      |                                                         |      |
| 26 |                    |                      |                                                         |      |
| 27 |                    |                      |                                                         |      |
| 28 | Confidentiality    | <a href="#">#27</a>  | How personal information about potential and            | 3,11 |
| 29 |                    |                      | enrolled participants will be collected, shared, and    |      |
| 30 |                    |                      | maintained in order to protect confidentiality before,  |      |
| 31 |                    |                      | during, and after the trial                             |      |
| 32 |                    |                      |                                                         |      |
| 33 |                    |                      |                                                         |      |
| 34 |                    |                      |                                                         |      |
| 35 |                    |                      |                                                         |      |
| 36 |                    |                      |                                                         |      |
| 37 |                    |                      |                                                         |      |
| 38 | Declaration of     | <a href="#">#28</a>  | Financial and other competing interests for principal   | 20   |
| 39 | interests          |                      | investigators for the overall trial and each study site |      |
| 40 |                    |                      |                                                         |      |
| 41 |                    |                      |                                                         |      |
| 42 |                    |                      |                                                         |      |
| 43 |                    |                      |                                                         |      |
| 44 | Data access        | <a href="#">#29</a>  | Statement of who will have access to the final trial    | 20   |
| 45 |                    |                      | dataset, and disclosure of contractual agreements       |      |
| 46 |                    |                      | that limit such access for investigators                |      |
| 47 |                    |                      |                                                         |      |
| 48 |                    |                      |                                                         |      |
| 49 |                    |                      |                                                         |      |
| 50 |                    |                      |                                                         |      |
| 51 | Ancillary and post | <a href="#">#30</a>  | Provisions, if any, for ancillary and post-trial care,  | N/A  |
| 52 | trial care         |                      | and for compensation to those who suffer harm from      |      |
| 53 |                    |                      | trial participation                                     |      |
| 54 |                    |                      |                                                         |      |
| 55 |                    |                      |                                                         |      |
| 56 |                    |                      |                                                         |      |
| 57 |                    |                      |                                                         |      |
| 58 |                    |                      |                                                         |      |
| 59 |                    |                      |                                                         |      |
| 60 |                    |                      |                                                         |      |

|    |                       |                      |                                                          |               |
|----|-----------------------|----------------------|----------------------------------------------------------|---------------|
| 1  | Dissemination         | <a href="#">#31a</a> | Plans for investigators and sponsor to communicate       | 2             |
| 2  |                       |                      |                                                          |               |
| 3  | policy: trial results |                      | trial results to participants, healthcare professionals, |               |
| 4  |                       |                      | the public, and other relevant groups (eg, via           |               |
| 5  |                       |                      | publication, reporting in results databases, or other    |               |
| 6  |                       |                      | data sharing arrangements), including any                |               |
| 7  |                       |                      | publication restrictions                                 |               |
| 8  |                       |                      |                                                          |               |
| 9  |                       |                      |                                                          |               |
| 10 |                       |                      |                                                          |               |
| 11 |                       |                      |                                                          |               |
| 12 |                       |                      |                                                          |               |
| 13 |                       |                      |                                                          |               |
| 14 |                       |                      |                                                          |               |
| 15 | Dissemination         | <a href="#">#31b</a> | Authorship eligibility guidelines and any intended       | 22            |
| 16 | policy: authorship    |                      | use of professional writers                              |               |
| 17 |                       |                      |                                                          |               |
| 18 |                       |                      |                                                          |               |
| 19 |                       |                      |                                                          |               |
| 20 |                       |                      |                                                          |               |
| 21 | Dissemination         | <a href="#">#31c</a> | Plans, if any, for granting public access to the full    | Not mentioned |
| 22 | policy: reproducible  |                      | protocol, participant-level dataset, and statistical     |               |
| 23 | research              |                      | code                                                     |               |
| 24 |                       |                      |                                                          |               |
| 25 |                       |                      |                                                          |               |
| 26 |                       |                      |                                                          |               |
| 27 |                       |                      |                                                          |               |
| 28 |                       |                      |                                                          |               |
| 29 | <b>Appendices</b>     |                      |                                                          |               |
| 30 |                       |                      |                                                          |               |
| 31 |                       |                      |                                                          |               |
| 32 | Informed consent      | <a href="#">#32</a>  | Model consent form and other related                     | 22            |
| 33 | materials             |                      | documentation given to participants and authorised       |               |
| 34 |                       |                      | surrogates                                               |               |
| 35 |                       |                      |                                                          |               |
| 36 |                       |                      |                                                          |               |
| 37 |                       |                      |                                                          |               |
| 38 |                       |                      |                                                          |               |
| 39 | Biological            | <a href="#">#33</a>  | Plans for collection, laboratory evaluation, and         | N/A           |
| 40 | specimens             |                      | storage of biological specimens for genetic or           |               |
| 41 |                       |                      | molecular analysis in the current trial and for future   |               |
| 42 |                       |                      | use in ancillary studies, if applicable                  |               |
| 43 |                       |                      |                                                          |               |
| 44 |                       |                      |                                                          |               |
| 45 |                       |                      |                                                          |               |
| 46 |                       |                      |                                                          |               |
| 47 |                       |                      |                                                          |               |
| 48 |                       |                      |                                                          |               |

None The SPIRIT checklist is distributed under the terms of the Creative Commons Attribution License CC-BY-ND 3.0. This checklist can be completed online using <https://www.goodreports.org/>, a tool made by the [EQUATOR Network](#) in collaboration with [Penelope.ai](#)

# BMJ Open

## Effectiveness of Breathing Exercises, Foot Reflexology and Back Massage (BRM) on Labour Pain, Anxiety, Duration, Satisfaction, Stress Hormones, and New-born Outcomes among Primigravidae during the First Stage of Labour in Saudi Arabia: A Study Protocol for a Randomised Controlled Trial

|                                 |                                                                                                                                                                                                                                                                                                                                                                                                                                                                                                                                                                                                                                                                                      |
|---------------------------------|--------------------------------------------------------------------------------------------------------------------------------------------------------------------------------------------------------------------------------------------------------------------------------------------------------------------------------------------------------------------------------------------------------------------------------------------------------------------------------------------------------------------------------------------------------------------------------------------------------------------------------------------------------------------------------------|
| Journal:                        | <i>BMJ Open</i>                                                                                                                                                                                                                                                                                                                                                                                                                                                                                                                                                                                                                                                                      |
| Manuscript ID                   | bmjopen-2019-033844.R1                                                                                                                                                                                                                                                                                                                                                                                                                                                                                                                                                                                                                                                               |
| Article Type:                   | Protocol                                                                                                                                                                                                                                                                                                                                                                                                                                                                                                                                                                                                                                                                             |
| Date Submitted by the Author:   | 11-Feb-2020                                                                                                                                                                                                                                                                                                                                                                                                                                                                                                                                                                                                                                                                          |
| Complete List of Authors:       | Baljon, Kamilya; Universiti Putra Malaysia Faculty of Medicine and Health Sciences, Department of Family Medicine; Umm Al-Qura University, Department of Nursing<br>Romli, Muhammad Hibatullah ; Universiti Putra Malaysia Faculty of Medicine and Health Sciences, Department of Nursing & Rehabilitation<br>Ismail @ Daud, Adibah Hanim; Universiti Putra Malaysia Faculty of Medicine and Health Sciences, Department of Family Medicine<br>Khuan, Lee; Universiti Putra Malaysia Faculty of Medicine and Health Sciences, Department of Nursing & Rehabilitation<br>Chew, Boon; Universiti Putra Malaysia Faculty of Medicine and Health Sciences, Department of Family Medicine |
| <b>Primary Subject Heading</b>: | Complementary medicine                                                                                                                                                                                                                                                                                                                                                                                                                                                                                                                                                                                                                                                               |
| Secondary Subject Heading:      | Complementary medicine, Nursing, Emergency medicine, General practice / Family practice, Public health                                                                                                                                                                                                                                                                                                                                                                                                                                                                                                                                                                               |
| Keywords:                       | Breathing exercises, Reflexology, Massage, Primigravidae, Labour pain, Stress hormones                                                                                                                                                                                                                                                                                                                                                                                                                                                                                                                                                                                               |
|                                 |                                                                                                                                                                                                                                                                                                                                                                                                                                                                                                                                                                                                                                                                                      |

SCHOLARONE™  
Manuscripts





I, the Submitting Author has the right to grant and does grant on behalf of all authors of the Work (as defined in the below author licence), an exclusive licence and/or a non-exclusive licence for contributions from authors who are: i) UK Crown employees; ii) where BMJ has agreed a CC-BY licence shall apply, and/or iii) in accordance with the terms applicable for US Federal Government officers or employees acting as part of their official duties; on a worldwide, perpetual, irrevocable, royalty-free basis to BMJ Publishing Group Ltd ("BMJ") its licensees and where the relevant Journal is co-owned by BMJ to the co-owners of the Journal, to publish the Work in this journal and any other BMJ products and to exploit all rights, as set out in our [licence](#).

The Submitting Author accepts and understands that any supply made under these terms is made by BMJ to the Submitting Author unless you are acting as an employee on behalf of your employer or a postgraduate student of an affiliated institution which is paying any applicable article publishing charge ("APC") for Open Access articles. Where the Submitting Author wishes to make the Work available on an Open Access basis (and intends to pay the relevant APC), the terms of reuse of such Open Access shall be governed by a Creative Commons licence – details of these licences and which [Creative Commons](#) licence will apply to this Work are set out in our licence referred to above.

Other than as permitted in any relevant BMJ Author's Self Archiving Policies, I confirm this Work has not been accepted for publication elsewhere, is not being considered for publication elsewhere and does not duplicate material already published. I confirm all authors consent to publication of this Work and authorise the granting of this licence.

1  
2  
3  
4  
5  
6  
7  
8  
9  
10  
11  
12  
13  
14  
15  
16  
17  
18  
19  
20  
21  
22  
23  
24  
25  
26  
27  
28  
29  
30  
31  
32  
33  
34  
35  
36  
37  
38  
39  
40  
41  
42  
43  
44  
45  
46  
47  
48  
49  
50  
51  
52  
53  
54  
55  
56  
57  
58  
59  
60

1 **Effectiveness of Breathing Exercises, Foot Reflexology and Back Massage (BRM) on**  
2 **Labour Pain, Anxiety, Duration, Satisfaction, Stress Hormones and New-born**  
3 **Outcomes among Primigravidae during the First Stage of Labour in Saudi Arabia:**  
4 **A Study Protocol for a Randomised Controlled Trial**

5  
6 **Kamilya Baljon<sup>1,2</sup>, Muhammad Hibatullah Romli<sup>3</sup>, Adibah Hanim Ismail@Daud<sup>1</sup>,**  
7 **Lee Khuan<sup>3</sup>, Boon-How Chew<sup>1\*</sup>**  
8

9 *<sup>1</sup> Department of Family Medicine, Faculty of Medicine and Health Sciences, Universiti*  
10 *Putra Malaysia, 43400 Serdang, Selangor, Malaysia*

11 *<sup>2</sup> Nursing College, Umm, Al-Qura University, Makkah, Saudi Arabia*

12 *<sup>3</sup> Department of Nursing and Rehabilitation, Faculty of Medicine and Health Sciences,*  
13 *Universiti Putra Malaysia, 43400 Serdang, Selangor, Malaysia*

14  
15 Corresponding author: Boon-How Chew, Department of Family Medicine, Faculty of  
16 Medicine and Health Sciences, Universiti Putra Malaysia, 43400 Serdang, Selangor,  
17 Malaysia. Tel: +603-89472520. Fax: +603-89472328. Email:  
18 [chewboonhow@upm.edu.my](mailto:chewboonhow@upm.edu.my)

1  
2  
3 **1 ABSTRACT**  
4  
5

6 **2 Introduction** Labour pain is among the severest pains primigravidae may experience  
7  
8 during pregnancy. Failure to address labour pain and anxiety may lead to abnormal labour.  
9  
10 Despite the many complementary non-pharmacological approaches to coping with labour  
11  
12 pain, the quality of evidence is low and best approaches are not established. This study  
13  
14 protocol describes a proposed investigation of the effects of a combination of breathing  
15  
16 exercises, foot reflexology and back massage (BRM) on the labour experiences of  
17  
18 primigravidae.  
19  
20  
21

22 **9 Methods and analysis** This randomised controlled trial will involve an intervention group  
23  
24 receiving BRM and standard labour care, and a control group receiving only standard  
25  
26 labour care. Primigravidae of 26–34 weeks of gestation without chronic diseases or  
27  
28 pregnancy-related complications will be recruited from antenatal clinics. Eligible and  
29  
30 consenting patients will be randomly allocated to the intervention or the control group  
31  
32 stratified by intramuscular pethidine (IMP) use. The BRM intervention will be delivered  
33  
34 by a trained massage therapist. The primary outcomes of labour pain and anxiety will be  
35  
36 measured during and after uterine contractions at baseline (cervical dilatation 6 cm) and  
37  
38 post-BRM hourly for two hours. The secondary outcomes include maternal stress hormone  
39  
40 (adrenocorticotrophic hormone, cortisol and oxytocin) levels, maternal vital signs (V/S),  
41  
42 foetal heart rate (FHR), labour duration, Apgar scores, and maternal satisfaction. The  
43  
44 sample size is estimated based on the between-group difference of 0.6 in anxiety scores,  
45  
46 95% power and 5%  $\alpha$  error, which yields a required sample size of 154 (77 in each group)  
47  
48  
49  
50  
51  
52  
53  
54  
55  
56  
57  
58  
59  
60

1 be examined with mixed-effects regression models, time series analyses and paired t-test  
2 or equivalent non-parametric tests, respectively.

3  
4  
5  
6  
7  
8  
9  
10 **Ethics and dissemination** Ethical approval was obtained from the Ethical Committee for  
11 Research Involving Human Subjects of the Ministry of Health in the Saudi Arabia (H-02-  
12 K-076-0319-109) on 14 April 2019, and from the Ethics Committee for Research Involving  
13 Human Subjects (JKEUPM) Universiti Putra Malaysia on 23 October 2019, reference  
14 number: JKEUPM-2019-169. Written informed consent will be obtained from all  
15 participants. Results from this trial will be presented at regional, national and international  
16 conferences and published in indexed journals.

17  
18  
19  
20  
21  
22  
23  
24  
25  
26 **Trial registration number and date** ISRCTN87414969, registered 3 May 2019

27  
28 **Keywords** Breathing exercises, Reflexology, Massage, Primigravidae, Labour pain, Stress  
29 hormones.  
30  
31  
32  
33  
34  
35  
36  
37  
38  
39  
40  
41  
42  
43  
44  
45  
46  
47  
48  
49  
50  
51  
52  
53  
54  
55  
56  
57  
58  
59  
60

## 1 Article Summary

### 2 Strengths and Limitations of the Study

- 4 • This single-blind, parallel, randomised controlled trial will explore the combined  
5 effects of breathing exercises, foot reflexology and back massage (BRM) on pain  
6 and anxiety during labour in healthy primigravidae with a singleton foetus.
- 7 • The effects of BRM will also be examined through objective physiological  
8 measurement of stress hormone levels and comparison of these levels between  
9 groups before and after the intervention.
- 10 • The intervention will be applied for one hour and only once during the first stage  
11 of labour after cervical dilatation of 6 centimetres.
- 12 • Blinding of the primigravidae mothers is not possible, and there may be bias in the  
13 self-assessed subjective outcomes such as the Visual Analog Scale.
- 14 • The expertise and experience of the nursing graduates who are trained to be the  
15 massage therapists is considered an important factor in the quality of treatment  
16 provided and this may underestimate the effect of BRM.

17 **Word count 4,907 words**

## 1 INTRODUCTION

2 Many primigravidae have reported experiencing various levels of pain during labour and  
3 high levels of anxiety about the labour process and its outcomes [1-3]. Anxiety escalating  
4 to fear is a common issue related to labour, especially among primigravidae [4, 5]. Other  
5 recorded negative perceptions and psychological effects influencing labour experiences  
6 include distress and feelings of powerlessness during labour for women and their families  
7 [5-7].

8 When poorly managed, labour pain may lead to severe consequences for women, such as  
9 prolonged labour [5, 8], which may increase the risk of foetal distress, head compression,  
10 intrauterine foetal death, low Apgar scores and physical injuries to neonates [5, 9].  
11 Prolonged labour results in increased risk of caesarean section, induced labour and assisted  
12 delivery using vacuum and forceps [10, 11]. Studies have also reported negative mental  
13 impacts on women, sometimes even including postnatal post-traumatic stress disorder [12,  
14 13], and subsequently reduced quality of life [14]. Feelings of anxiety often originate from  
15 possible birthing complications about which pregnant women have heard and read [4, 5,  
16 15, 16], and may even result in women refusing normal vaginal delivery and insisting on  
17 caesarean sections without medical indications [17]. It is therefore important for healthcare  
18 professionals to assist and educate all expectant mothers on labour pain management.

19 Appropriate labour pain management and interventions are important aspects of obstetric  
20 care to ensure optimum outcomes for mothers and babies [18]. Pharmacologic  
21 interventions used in the management of labour pain include systemic sedatives, analgesics

1 and regional anaesthesia [19]. Examples of these analgesics are aerosol and epidural  
2 opioids, intramuscular pethidine (IMP) and intravenous sedatives [20, 21]. Some of these  
3 are expensive and may be associated with adverse effects on mothers, the labour process  
4 and neonates [22]. In contrast, most non-pharmacological methods for labour pain  
5 management are simple and non-invasive, and are often cheaper and safer than  
6 pharmacological interventions [23-25]. Studies have found that non-pharmacological  
7 approaches, particularly breathing exercises, have positive impacts on relief of labour pain  
8 [26-28], and anxiety in pregnant mothers [29-31]. This is especially true for Lamaze  
9 breathing, deep breathing exercises [26-28, 32, 33], reflexology [34, 35], and massage [36].  
10 Non-pharmacological approaches have been linked to shorter labour duration [37], and  
11 improved new-born outcomes [38]. Our systematic review found that massage is beneficial  
12 for relieving labour pain [39], and is associated with greater relaxation, higher alertness  
13 levels, improved mood and reduced stress hormone (cortisol) levels and anxiety symptoms  
14 [40].

## 15 **Rationale**

16 It is hypothesised that the non-pharmacological approach of labour pain management  
17 occurs via the alteration of nociceptive stimuli and modification of the processing of  
18 nociceptive input at the central level, resulting in an overall improved sense of comfort and  
19 well-being, ultimately leading to stronger coping capabilities by the mothers in labour [41].

20 The physiological mechanism of breathing is a protective action as it is a fight-or-flight  
21 reflex triggered by the central nervous system. Physiologically, deep abdominal breathing  
22 stimulates the parasympathetic nervous system. As a result, the blood circulation in

1 pregnant women will undergo oxygenation, which will trigger the release of endorphins  
2 associated with decrease in heart rate and increase in feelings of calmness. At the same  
3 time, endorphins can also suppress the sympathetic system, leading to a decrease in the  
4 release of stress hormones such as cortisol [42, 43].

5 As for reflexology, so far there has been no constructive explanation of the underlying  
6 mechanism in reducing labour pain [35, 37]. The reflexology therapist will apply pressure  
7 many times on specific points of the feet that are energetically connected to certain parts  
8 and organs of the body. These include reflex points on the tips of the fingers that reflect  
9 the head, brain, and pituitary gland, and are believed to facilitate the secretion of the  
10 endogenous endorphins that reduce labour pain, stress, fatigue and anxiety [44, 45].  
11 Pressure on the solar plexus at the border of the upper and middle one-third of the sole is  
12 believed to facilitate the functions of the body's nervous system [46]. Pressure on the lower  
13 part of the forefoot reflects the heart and lungs. While pressure on the bridge of the foot  
14 reflects the liver and kidney and the heel will reflect the lower back, legs, pelvic region  
15 uterus, and intestines. The uterine point is believed to be located in the indented region  
16 between the inner ankles and the sole [47]. Therefore, it is believed to be helpful during  
17 labour. The pressure on toe and heel stimulate the reflex points in the pelvis. The pressure  
18 on the middle toe facilitate the cervical dilation and ease uterine contractions [48, 49].

19 However, there are several postulated theories for its mechanism of action. Firstly, the  
20 autonomic-somatic integration theory suggests that the pressure applied to the feet during  
21 reflexology compresses the receptors in the cells, thus opening up the ionic channels in the  
22 plasma membrane and triggering a local action with the potential to convey messages to



1 the spinal cord and/or brain [50]. The application of alternating pressure to the feet may  
2 also produce predictable reflexive actions within the nervous system and activate the  
3 parasympathetic nervous system [51].

4 Another contemporary method explains that reflexology acts through “sympathetic  
5 resonance,” in which an energy wave flows between therapist and client, promoting  
6 homeostatic balance [52]. This may occur through local enzymatic reactions on receptive  
7 fields or through an improved blood supply as a result of local skin temperature changes  
8 following the skin-to-skin contact [53]. Reflexologists also believe that the application of  
9 deep pressure on certain reflex points of the sole and palm may break any calcium crystals  
10 and uric acid accumulated in nerve endings that may cause blockages and induce pain [54].

11 Reflexology also results in body relaxation and stimulation of any blocked nerve endings,  
12 which may propel any sluggish glands or organs to regain their normal functioning [55].

13 Ambiguity remains regarding the theories and mechanism of action of foot reflexology for  
14 labour pain, as compared to that for general pain [35-37]. Nonetheless, it is plausible to  
15 believe that reflexology techniques would have similar physiological effects for labour pain  
16 that bring about a sense of wellbeing, analgesia and subsequently the perception of pain  
17 relief [38]. Figure 1 summarizes the possible mechanisms of Reflexology therapy.

18 Massage therapy is another type of commonly used Complementary and Alternative  
19 Method (CAM) for the promotion of health and wellbeing [36]. Massage is a potent  
20 mechanical stimulus that produces a short-lived analgesic effect by activating the ‘pain  
21 gate’ mechanism [56]. Longer-lasting pain control appears to be mediated mainly by the

1 descending pain suppression mechanism by activation of descending efferent pathways  
2 [57]. The inhibition of pain-transmission neurons involves a combination of physiological  
3 and neurological mechanisms and it is commonly activated by noxious stimulation [58].  
4 Figure 2 summarizes the possible mechanisms action of massage therapy [59].

5 The three aforementioned therapies (i.e. BRM) for labour pain management have been  
6 shown to influence the secretion of certain stress hormones such as cortisol,  
7 adrenocorticotrophic hormone (ACTH), and oxytocin (OT) [40, 49, 60, 61], endorphins [61-  
8 65]. Endogenous oxytocin is a key component in the molecular pathways that buffer  
9 reaction to stress and decrease sensitivity to pain and inflammation [66]; cortisol is an  
10 important hormone released during stressful conditions [40].

### 11 **Significance of this clinical trial**

12 Many studies have reported that not all pharmacologic and non-pharmacologic methods on  
13 their own are able to reduce labour pain satisfactorily. Despite the intervention, some  
14 mothers still endure some pain, anxiety and prolonged labour, and suffer from negative  
15 maternal and perinatal consequences [5, 15, 16]. From the perspective of complementary  
16 management, BRM are the techniques with the highest potential for managing pain and  
17 anxiety for primigravidae. Systematic reviews have concluded that CAM interventions to  
18 manage pain and anxiety during labour have often been biased and/or poorly executed, thus  
19 resulting in low quality of evidence [67-70], or no strongly supported evidence [71, 72].  
20 Therefore, there is a need for a rigorous and robust trial to examine the effect of the  
21 combined intervention of BRM on labour pain, anxiety, stress hormones, V/S, FHR,

1 duration of labour, Apgar Scores and maternal satisfaction among the primigravidae using  
2 multiple relevant outcome measures.

### 3 **METHODS AND DESIGN**

4 This study aims to investigate the combined effect of BRM on labour pain, duration of  
5 labour, anxiety, maternal satisfaction, stress hormones, and new-born outcome among  
6 primigravidae in Saudi Arabia. The specific objectives are 1) to compare the effect of the  
7 combined breathing exercise, foot reflexology, and back massage (intervention) on labour  
8 pain intensity, anxiety level, duration of labour, maternal satisfaction, stress hormones, and  
9 neonatal outcome compared to the standard midwifery care (control); 2) to identify the  
10 predictors of pain, anxiety, duration of labour, the satisfaction of mother, and neonatal  
11 outcome from the baseline sociodemographic and obstetric characteristics.

#### 12 **Study Design**

13 The study design will be a single-blind parallel randomised controlled trial (RCT), in which  
14 participants are randomly assigned to receive either the BRM intervention or control care.

#### 15 **Study Setting**

16 This study will be conducted in the Makkah Maternity and Children Hospital (MCH) in  
17 Makkah, Saudi Arabia. The hospital is a tertiary-level, governmental referral hospital with  
18 special services for paediatrics, gynaecology, and obstetrics [73]. In Saudi Arabia, almost  
19 all tertiary hospitals, including our study site, offer systemic pharmacologic agents, either  
20 intravenous or intramuscular analgesics to manage pain during labour [74]; however,

1 providing non-invasive and non-pharmacological methods of pain relief during labour are  
2 not common practices [74]. To our best knowledge, the combined effect of BRM on  
3 primigravidae has not been investigated at any Saudi Arabia hospital prior to this trial.

#### 4 **Participants**

5 The study participants will include primigravidae, age 20–35 years old, at 37 to 41 weeks  
6 of gestation, and in the first stage of labour. The inclusion criteria include singleton  
7 pregnancy, cephalic presentation, and regular contraction. In labour, the participants must  
8 achieve six centimetres of cervical dilatation, with a minimum of 3 contractions of at least  
9 moderate intensity every 10 minutes, in which the duration of the contraction must be  
10 between 30–60 seconds.

11 The exclusion criteria include diagnosis of underlying chronic diseases such as  
12 cardiovascular disease, kidney disease, diabetes, asthma, mental health disorders, epilepsy  
13 or seizure; pregnancy-related diseases such as gestational diabetes, preeclampsia, cephalo-  
14 pelvic disproportion, polyhydramnios or oligohydramnios or deep venous thrombosis; and  
15 pregnancy complications such as placenta praevia, antepartum haemorrhage, fetal distress  
16 or being put on analgesics other than IMP.

#### 17 **Patient and Public Involvement**

18 Patients are involved in the questionnaire's face and content validity testing. Based on  
19 feedback from the patients in a pilot study, improvement to the questionnaires' approaches  
20 and trial processes will be implemented. Patient preferences were not directly obtained

1 with regard to choosing the BRM intervention; this was based on the principal  
2 investigator's practice experience and encounters with pregnant women.

### 3 **Recruitment**

4 Recruitment will be conducted at the antenatal clinic at the trial site. Only those who plan  
5 to deliver in the trial hospital's delivery room will be further briefed and assessed for their  
6 eligibility. At this hospital, antenatal mothers are given monthly follow-up appointments  
7 until 28 weeks' gestation. The frequency increases to bi-weekly until 32 weeks' gestation;  
8 then patients are seen weekly until delivery.

9 For this study, we will approach primigravidae between 26 to 34 weeks of gestation in  
10 equal numbers based on the gestational weeks. This means that about an equal number of  
11 primigravidae at week of gestation of 26, 28, 30, 32 and 34 will be recruited in order to  
12 spread out the occurrence of labour in the subsequent 2–3 months to increase the feasibility  
13 of the BRM intervention. Because participant recruitment and the training of the research  
14 team members is estimated to last up to two to three months, women of 34+ weeks gestation  
15 cannot be recruited during this period because they will inevitably go into labour before  
16 the research preparations are complete.

17 At the antenatal clinic, the principal investigator will provide general health education  
18 about pain management during labour. The participant information sheet of this RCT will  
19 be provided for the eligible patients. If they are interested in participating, they will sign a  
20 written consent form and will be identified by a unique stamp on their antenatal cards.

1  
2  
3 1 When the participants arrive in the labour room for delivery, they will be re-evaluated for  
4  
5 2 the eligibility.  
6  
7

### 8 9 3 **Randomisation**

10  
11 4 Since IMP is a commonly prescribed analgesic in labour, and may have substantial effects  
12  
13 5 on the primigravidae and neonates, randomisation will be stratified according to the  
14  
15 6 administrative status of IMP. This will ensure the same numbers of primigravidae with and  
16  
17 7 without IMP in the intervention and control groups. To achieve this, we use a block of size  
18  
19 8 4 with a 1:1 allocation ratio, leading to a possibility of 6 permutations. All possible block  
20  
21 9 sequences will be randomly generated with the help of free software from the internet  
22  
23 10 <https://www.sealedenvelope.com/simple-randomiser/v1/>. A random list will be created  
24  
25 11 after the sample size number, treatment groups, block sizes, list length, and stratification  
26  
27 12 factors are entered into the software. The order of the subjects will be used by the research  
28  
29 13 coordinator who will be stationed in the delivery room to conduct the random group  
30  
31 14 allocation for primigravidae in labour who have achieved a cervical dilation of 6 cm. The  
32  
33 15 principal investigator, outcome assessors, and massage therapist in this trial will not be  
34  
35 16 involved in the allocation of the interventional groups. Figure 3 outlines the CONSORT  
36  
37 17 flow diagram.  
38  
39  
40  
41  
42  
43  
44

### 45 18 **Data Collection**

46  
47  
48 19 Every questionnaire will be coded with a unique number. Data collection in the delivery  
49  
50 20 room will be facilitated by the trained research coordinator and two outcome assessors.  
51  
52 21 The outcome assessors will be assigned to the control or the intervention group on the same  
53  
54  
55  
56  
57  
58  
59  
60

1 day. Once the form is completed by the outcome assessors, it will be kept by the research coordinator in a safe location in the delivery room.

Throughout all of the outcome assessment time points, a massage therapist will be present in the delivery room of both the intervention and control groups. For the intervention group, the primigravidae in labour will receive the BRM intervention from the massage therapist. For the control group, the practicing midwife will perform routine labour care such as touch therapy, ensuring that the mother lies on her left side, and providing encouragement and counselling. The outcome assessor will measure and assess both the intervention and control groups at the same time points. Both groups will be equipped with similar extra equipment. This blinding effort is intended to minimize biases during the outcome assessment. However, blinding of the participants will be impossible due to the nature of the intervention.

### 13 **Interventions**

14 The BRM intervention consists of 5 minutes of breathing exercise followed by 10 minutes  
15 of foot reflexology on each sole and 35 minutes of continuous massage over the lower  
16 limbs and back. The massage therapist will allow the primigravidae to lie on the left side  
17 [75], to move and change her position during the intervention, and answer any question or  
18 inquiry. Table 1 provides a detailed explanation of the BRM intervention procedure. As  
19 for the control group, the primigravidae in labour will receive routine labour room care.

20

21

## 1 **Training for the research team members**

2 A total of 13 research assistants will be recruited and trained for the intervention and data  
3 collection from June to December 2019, (Figure 4). They will be given the BRM training  
4 for one week by the principal investigator who has completed the professional massage  
5 and reflexology training at a certified training centre in Malaysia (Tim Body Care Training  
6 Centre 1403695-D) for six months including training and working.

## 7 **Study Outcomes and Measures**

8 There are eight outcomes: two primary outcomes and six secondary outcomes. The two  
9 primary outcomes are pain intensity and anxiety level (See Table 2). Pain intensity is  
10 measured with the Present Behavioural Intensity (PBI) [76,77] and the self-report Visual  
11 Analog Scale (VAS) [78-82], while anxiety is measure with Anxiety Assessment Scale for  
12 Pregnant Women in Labour (AASPWL) [83].

13 The outcome assessor will ask the pregnant women to pick a colour on an A-4 sized paper  
14 that contains six different coloured parts, from no pain (score 1) to most severe pain (score  
15 6) based on her level of pain [81, 84]. The researcher selected the VAS questionnaire  
16 because it is an acceptable tool and relatively easy to administer to women in labour. Pain  
17 intensity will be measured at baseline before the intervention, and multiple times during  
18 and after contractions (Figure 5a). During the intervention, pain intensity will be measured  
19 after the breathing exercise and foot reflexology therapy (after 25 minutes from the start of  
20 the intervention), followed by another assessment halfway through the massage therapy  
21 (after 45 minutes) during and after contraction. Pain intensity will be measured for every



1 participating primigravidae in both the intervention and control group. For the control  
2 group, pain intensity will be measured first at baseline before the intervention at 6 cm.  
3 During the intervention, pain intensity will be measured after 25 minutes from the start of  
4 the intervention time, followed by another assessment after 45 minutes, during and after  
5 contraction. Upon completion of the intervention, the measurement will be taken  
6 immediately, and twice hourly thereafter during the first stage of labour (Figure 5b).

7 The AASPWL will be used to assess anxiety during labour. The anxiety level will be  
8 measured at cervical dilatation of 6cm, after the completion of the interventions, and twice  
9 every 60 minutes during the first stage of labour. For the control group, the assessment will  
10 be performed when the cervix is at 6 cm, after one hour (synchronized to the completion  
11 of the intervention in the intervention group), and twice every 60 minutes during the first  
12 stage of labour (Figure 3b).

13 The secondary outcomes measured in the RCT include maternal stress hormones level,  
14 maternal V/S, FHR, duration of labour, neonatal Apgar score, and maternal satisfaction  
15 [85] (See Table 3).

16 The stress hormones level will be measured at baseline, and again one and a half hour after  
17 the patient has reached 6 cm of cervical dilatation (Figure 5). Blood samples will again be  
18 taken by midwives on duty in the delivery room. This will occur after the BRM intervention  
19 in the intervention group (Figure 5a), and at the same time in the control group (Figure 5b).

20 The research assessors will collect an 8 ml blood sample in a plain tube, of which 3 mls is  
21 for ACTH, 3 mls for cortisol, and 2 mls for OT hormones; it will be sent immediately to

1 the MCH laboratory to carefully avoid any haemolysis of the samples. Hormones will be  
2 analysed by the sandwich ELISA technique using commercial kits by Cobas e411 Analyzer  
3 (HITACHI, USA) for ACTH hormone, and Abbot Architect I200 Analyzer (Abbott, USA)  
4 for Cortisol and OT hormones.

5 Since cortisol levels follow a diurnal variation or circadian rhythm where the hormone  
6 levels peak in the morning and fall at night, and vary in accordance with a number of factors  
7 including age, time of day, stress level, sample type, laboratory location and the method  
8 used for testing [86, 87], we will use a chart from the laboratory to verify the normal  
9 cortisol range in the morning, noon, afternoon, evening, or night, and compare these ranges  
10 to the blood samples taken to determine whether the blood test results of the participants  
11 before and after the intervention are high, normal or low.

12 ACTH and cortisol levels are interrelated. When the cortisol levels are at their peak, ACTH  
13 levels generally fall and vice versa [88]. Hence, it may be understood that ACTH and  
14 cortisol have corresponding levels at any given point of time. This provides a relative value  
15 for both stress hormones. With regard to OT, the blood sample test for the pregnant  
16 woman will be higher if she receives an infusion of OT during intervention [89, 90]. If the  
17 events are equal in both groups, we will proceed to the analysis as planned. If the events  
18 are many and unequal in both groups, we will either conduct a separate statistical analysis  
19 stratified according to the event of OT infusion. If the number of event occurrences is low,  
20 we may exclude these participants and analyse the outcome as planned. However, the  
21 author will investigate the oxytocin level before and after applying the BRM in addition to  
22 childbirth. Oxytocin increases with contraction and hypothetically with and after BRM.

1  
2  
3 1 The oxytocin will increase in the second stage, inhibit the Stress hormones, and will  
4  
5 2 increase after apply the BRM.  
6  
7  
8  
9

10 3 Maternal V/S and FHR will be collected twice at 6cm cervical dilatation and immediately  
11  
12 4 post-BRM for the intervention group, and the same data will be collected at the same timing  
13  
14 5 for the control groups. The Apgar Scores (taken from the delivery room medical record)  
15  
16 6 and maternal satisfaction will be measured only once at the completion of the childbirth,  
17  
18 7 before the transfer of the mother from the delivery room to the postnatal ward.  
19  
20  
21  
22

### 23 8 **Sample size**

24  
25 9 The sample size estimation was based on a review of similar literature on pain and anxiety  
26  
27 10 as outcomes [76], and calculated using G\*power free software [76]. We estimated an effect  
28  
29 11 size of 0.6 on anxiety mean score reduction in the intervention group compared to the  
30  
31 12 control [76], as this gives a larger required sample size compared to that based on the  
32  
33 13 primary outcome of pain. Thus, with the power of 95% at  $\alpha$  error 0.05, the required sample  
34  
35 14 size is 128 for the two groups. It is further inflated to 154 to account for a predicted 20%  
36  
37 15 attrition rate. Therefore, a minimum number of 77 primigravidae will be recruited for each  
38  
39 16 group.  
40  
41  
42  
43  
44  
45

### 46 17 **Statistical analysis**

47  
48 18 Data will be entered by a blinded enumerator. The database will be checked for accuracy  
49  
50 19 before analysis. The principal investigator has the overall responsibility for the  
51  
52 20 compilation, maintenance, and management of the study database. The analysis will be  
53  
54 21 performed using IBM Statistical Package for Social Science (SPSS) version 25.  
55  
56  
57  
58  
59  
60

1 Descriptive statistical analysis will be performed according to the distribution of the data,  
2 using means and standard deviations for data with normal distribution, and median and  
3 inter-quartile ranges for data that are not normally distributed. Normality testing will be  
4 conducted for all continuous variables using different methods such as Histogram and p-p  
5 plot. Categorical variables will be reported in frequencies and percentages.

6 The differences between the groups and times level will be analysed using a Generalised  
7 Linear Mixed Model (GLMM). GLMM is appropriate where repeated measurements are  
8 made on the same statistical units. GLMM will also be used to accommodate non-normal  
9 distribution in outcome data. The variables of time in a categorical form, intervention  
10 group, group\*time interaction, and the baseline random part of the model will include a  
11 random intercept and an unstructured correlation matrix for the correlation of  
12 measurements within pregnant women. The fixed part of the model will include pain score,  
13 whereby the difference in pain score at every time point will be tested using a linear  
14 contrast. We will take the pain intensity measured with PBI and VAS at one-hour post  
15 intervention as the main co-primary outcomes. This is because the effects of the massage  
16 and reflexology will still be observable, and thus the intervention group can be fairly  
17 compared to the control group [50-57].

18 Any significant baseline imbalances will be adjusted for in the analysis. If necessary,  
19 multiple imputations will be conducted for the missing data. A calculated 95% confidence  
20 interval and two-sided  $\alpha$  of 0.05 will be used to test significance. In addition, we will  
21 analyse PBI and VAS at the same time points and measure the agreement between PBI and  
22 VAS by using the Spearman correlation coefficient and interclass correlation. We will

1 analyse other outcomes using the same statistical strategy mentioned above. Additionally,  
2 we will conduct time series analyses to examine the patterns of change in the outcomes  
3 between the two groups and after BRM intervention.

4 The independent effect(s) of socio-demographic and obstetric characteristics on each  
5 primary and secondary outcome at one-hour post-intervention will be analysed using  
6 multiple linear regression analyses.

## 7 **Discussion**

8 Safe and efficient pain management is important for pregnant women and their families  
9 [18], and different types of CAM have been shown to be beneficial to reduce or alleviate  
10 labour pain. However, evidence is scarce regarding the effects of combined therapies [91].  
11 Therefore, we designed this trial to study the effects of BRM on labour pain and other  
12 psychological and physiological impacts among primigravidae. The study protocol for the  
13 RCT is to determine the combined effect of BRM on the intensity of pain and level of  
14 anxiety in primigravidae during the first stage of labour. Additional outcomes that will be  
15 assessed include stress hormones, maternal VS, FHR, duration labour, neonatal Apgar  
16 score, and maternal satisfaction.

17  
18 In this study, the intervention will be applied only once and only during the first stage of  
19 labour even though the first stage of labour among primigravidae takes approximately 8–  
20 12 hours. By timing the intervention after cervical dilation of 6 cm, the effect of the  
21 combined BRM could exert its greatest influences (if any) on the labour experience of the

1 primigravidae and neonatal outcome, because this period is believed to accompany the  
2 highest levels of labour pain [92, 93].

3 We will assess the outcomes using a mixture of subjective and objective tools. For  
4 example, pain intensity and anxiety levels are subjective measurements, based on the  
5 personal feelings and judgments of the respondents. Duration of labour, neonatal Apgar  
6 score, and maternal stress hormones level of ACTH, cortisol, and oxytocin are objective  
7 measurements that will indicate the stress response to the BRM intervention conducted on  
8 the primigravidae. This is one of the strengths of our study.

9 VAS is one of several ways of measuring the effectiveness of BRM, and is a commonly  
10 used graphic rating method [76, 84]. However, VAS might not be the gold standard to  
11 measure labour pain, given the inconsistency of its results and its ceiling effect [84, 94].  
12 Recognizing this inadequacy, we will ensure that the participants understand the VAS  
13 scoring at admission to the delivery room before they are asked to indicate their pain level  
14 later. Labour pain outcome will also be measured via pain intensity assessment using the  
15 PBI [76], which will be rated by outcome assessors. Multiple measurements will be taken  
16 during and after contraction, and before and after the intervention. There will also be other  
17 outcomes, related to maternal response to pain, namely anxiety level and maternal stress  
18 hormones [95].

19 This study has several other limitations. First, the intervention will be performed for one  
20 hour, during which it may be interrupted by routine medical care such as regular vaginal  
21 examinations, V/S measurements, and FHR monitoring. However, we believe that this will

1 not reduce the effect of the BRM intervention, because we can start the BRM before or  
2 after the labour care routine. Second, the process of labour and birthing is unpredictable  
3 even if the participants are low-risk. In certain instances, the process of the intervention  
4 might not go well as planned and this may reduce the sample size. Some patients may end  
5 up needing a caesarean section, and some may suffer from other obstetric complications  
6 during delivery. As a result, we have inflated the sample size accordingly. Third, the results  
7 from this study will not be generalisable to multigravidae as we include only primigravidae.  
8 Nevertheless, we believe that primigravidae will benefit the most from the intervention as  
9 they are likely to experience a higher level of labour pain and a longer duration of labour  
10 compared to multigravidae. Fourth, placebo effects can influence patient outcomes after  
11 (CAM), resulting in high rates of good outcomes, which may be wrongly attributed to  
12 specific treatment effects [96].

13  
14 We recognise that the expertise and experience level of the reflexologist is an important  
15 factor in the quality of treatment provided and this may affect the outcomes of the BRM.  
16 The massage therapists and the outcome assessors will be given the appropriate training  
17 on the BRM for one week by the principal investigator who attended a professional training  
18 and was certified. After the training, they will be tested in a pilot study to ensure their  
19 competency in performing the BRM. Additional quality control measures for the outcome  
20 assessors are planned, as they will be assigned to the control delivery room or the  
21 intervention delivery room on the same day. All of the completed assessment forms will  
22 be reviewed and kept by the research coordinator in a safe location in the delivery room.

1  
2  
3 1 Any issues on the form such as blank spaces and extreme values will be immediately  
4  
5 2 clarified and resolved.  
6  
7  
8  
9

10 3 In addition to labour pain, this study will assess the anxiety level of pregnant mothers.  
11  
12 4 Unlike labour pain, anxiety level can be affected by individual characteristics, previous life  
13  
14 5 experiences, and other environmental causes [97]. However, we believe that these factors  
15  
16 6 will not play a significant role after effective randomisation.  
17  
18  
19  
20

21 7 Apart from the actual labour experience, there are a few other external factors that may  
22  
23 8 affect maternal satisfaction, such as the delivery room services, the health of the baby, the  
24  
25 9 gender of the child, family support, and other psychosocial factors. As satisfaction is a  
26  
27 10 multi-dimensional and complex feeling, it is difficult to measure with a single tool and to  
28  
29 11 narrow it down to only the first stage of labour.  
30  
31  
32  
33

34 12 It is understood that a birthing process is a natural event, especially for low-risk women.  
35  
36 13 Thus, the management of labour should be conducted in a supportive manner with minimal  
37  
38 14 or no interferences. This study will provide high-quality evidence about the effects of the  
39  
40 15 combined BRM for labour pain management. These findings will be important for hospitals  
41  
42 16 offerings for expectant mothers in providing a rationale for their decisions about which  
43  
44 17 alternative treatments to offer, to primigravidae and their family members during decision  
45  
46 18 making about labour pain management.  
47  
48  
49  
50  
51  
52  
53  
54  
55  
56  
57  
58  
59  
60



## 1 **Acknowledgements**

2 The authors would like to acknowledge the assistance provided by Um-Al-Qura  
3 University, the Research Department in the Directorate of Health Affairs, Makkah Region,  
4 and Saudi Arabia Culture Mission in Saudi Arabia.

## 5 **Author Contributions**

6 KB drafted, formulated, and submitted the manuscript. All authors MHR, AHI, LK & BHC  
7 contributed to the study designs, read, revised, and approved the research protocol critically  
8 for important intellectual content and helped to draft the final manuscript. All authors  
9 approved the final manuscript for submission. Authorship eligibility is in accordance with  
10 the International Committee of Medical Journal Editors (ICMJE) guidelines.

## 11 **Funding**

12 This work was supported by the Umm Al-Qura University and Saudi Arabia Culture  
13 Mission (SACM). The author (KB) is a student who owns a Financial Guarantee, which  
14 covers the study and research process. The Financial Guarantee will cover all the research's  
15 payments. The funders will not be involved in the study design, data collection, analysis  
16 and interpretation of the data and writing of the manuscript.

## 17 **Competing Interest**

18 The authors declare that they have no competing interests.

## 19 **Patient Consent for Publication**

20 Not applicable since this is a study protocol.

## 1 **Availability of Data and Materials**

2 The datasets will be available from the corresponding author on reasonable request. The  
3 data will be kept for a maximum period of two years from the end of data analysis and will  
4 be placed in a sealed envelope that will remain with the primary author. Subsequently, the  
5 forms will be destroyed via a shredding machine located at UPM in the presence of my  
6 supervisor and some academic staff. The soft copy and record data, as well as the  
7 questionnaires and database of hard copy will be deleted, and we will re-setup windows in  
8 the computer to destroy the database after a maximum period of two years.

## 9 **Ethics Approval and Consent to Participate**

10 Ethics approval was obtained from the Ethical Committee for Research Involving Human  
11 Subjects of the Ministry of Health in the Saudi Arabia (H-02-K-076-0319-109) on 14 April  
12 2019, and from the Ethics Committee for Research Involving Human Subjects (JKEUPM)  
13 Universiti Putra Malaysia on 23 October 2019, reference number (JKEUPM-2019-169).  
14 Additional administrative approval will be requested from the medical director of the  
15 Makkah Maternity and Children Hospital. The participant information sheet for the  
16 pregnant women will be also provided. If they are interested and eligible to participate,  
17 pregnant women will sign consent forms. Consent form contains purpose of this study,  
18 procedures involved in the research pre and post intervention. They will inform the  
19 potential benefits and risk of the intervention research. Participants will be given an  
20 affirmation of confidentiality and protection the data collection. The results won't be  
21 disseminated to the study participants, except If one of the participants would like to know  
22 her results, her mobile number will be taken and a message will be sent.

## 1 **Patient and Public Involvement**

2 Patients are involved in the questionnaire's face and content validity testing. Based on  
3 feedback from the patients in a pilot study, improvement to the questionnaires' approaches  
4 and trial processes will be implemented. Patient preferences were not directly obtained  
5 with regard to choosing the BRM intervention; this was based on the principal  
6 investigator's practice experience and encounters with pregnant women. However, the  
7 patients will be involved in the recruitment to and conduct of the study. They will attend  
8 antenatal class and agreement by consent to share in this study. Also, they will answer all  
9 questionnaires pre and post the intervention. In addition, they will need to agree to BRM  
10 as the intervention.

## Reference

1. Gibson E. Women's expectations and experiences with labour pain in medical and midwifery models of birth in the United States. *Women and Birth*. 2014;27:185–9. <https://doi.org/10.1016/j.wombi.2014.05.002>.
2. Beigi NMA, Broumandfar K, Bahadoran P, et al. Women's experience of pain during childbirth. *Iran J Nurs Midwifery Res* 2010;15:77–82.
3. Devilata T, Swarna S. Effectiveness of pre delivery preparation on anxiety among Primigravida mothers at maternal child health centre Tirupati, AP, India. *IOSR J Nurs Heal Sci* 2015;4:19-24. <https://doi.10.9790/1959-04651924>.
4. Aksoy M, Aksoy AN, Dostbil A, et al. The Relationship between Fear of Childbirth and Women ' s Knowledge about Painless Childbirth. *Obstet Gynecol Int* 2014;2014:7. <http://dx.doi.org/10.1155/2014/274303>
5. Nystedt A, Hildingsson I. Diverse definitions of prolonged labour and its consequences with sometimes subsequent inappropriate treatment. *BMC Pregnancy Childbirth* 2014;14:233. <https://doi.org/10.1186/1471-2393-14-233>
6. Hanjani SM, Tourzani ZM, Shoghi M. The Effect of Foot Reflexology on Anxiety , Pain , and Outcomes of the Labor in Primigravida Women. *Acta Med Iran*. 2014;53:507–511.
7. Li W, Zhang H, Ling Y, et al. Effect of prolonged second stage of labor on maternal and neonatal outcomes. *Asian Pac J Trop Med* 2011;4:409–411. [https://doi.org/10.1016/S1995-7645\(11\)60114-4](https://doi.org/10.1016/S1995-7645(11)60114-4)
8. Neal JL, Lamp JM, Buck JS, et al. Outcomes of Nulliparous Women with Spontaneous Labor Onset Admitted to Hospitals in Pre-active versus Active Labor. *J Midwifery Womens Heal* 2014;59:28–34. doi:10.1111/jmwh.12160.Outcomes
9. Kjærgaard H, Olsen JØRN, Ottesen B, et al. Incidence and outcomes of dystocia in the active phase of labor in term nulliparous women with spontaneous labor onset. *Acta Obstet Gynecol* 2009;88:402-407. doi:10.1080/00016340902811001
10. Lowe NK. A Review of Factors Associated With Dystocia and Cesarean Section in Nulliparous Women. *J Midwifery Women's Heal* 2007;52:216–228. doi:10.1016/j.jmwh.2007.03.003
11. Shields SG, Ratcliffe SD, Fontaine P, et al. Dystocia in nulliparous women. *Am Fam Physician* 2007;75:1671-1678.
12. Garthus-Niegel S, Knoph C, von Soest T, et al. The Role of Labor Pain and Overall Birth Experience in the Development of Posttraumatic Stress Symptoms: A Longitudinal Cohort Study. *Birth* 2014;41:108–115. <https://doi.org/10.1111/birt.12093>

- 1  
2  
3 1 13. Peeler S, Stedmon J, Chung MC, et al. Women's experiences of living with postnatal  
4 2 PTSD. *Midwifery* 2018;56:70–78. <https://doi.org/10.1016/j.midw.2017.09.019>
- 6 3 14. Boryri T, Noori NM, Teimouri A, et al. The perception of primiparous mothers of  
7 4 comfortable resources in labor pain (a qualitative study). *Iran J Nurs Midwifery Res*  
8 5 2016;21:239–246. <https://doi.org/10.4103/1735-9066.180386>
- 11 6 15. Størksen HT, Garthus-niegel S, Adams SS, et al. Fear of childbirth and elective  
12 7 caesarean section : a population-based study. *BMC Pregnancy Childbirth* 2015;15:221.  
13 8 <https://doi.org/10.1186/s12884-015-0655-4>
- 15 9 16. Stoll KH, Hauck YL, Downe S, et al. Preference for cesarean section in young  
16 10 nulligravid women in eight OECD countries and implications for reproductive health  
17 11 education. *Reprod Health* 2017;14:116. <https://doi.org/10.1186/s12978-017-0354-x>
- 20 12 17. El-Aziz SNA, Mansour SE, Hassan NF. Factors associated with fear of childbirth: It's  
21 13 effect on women's preference for elective cesarean section. *J Nurs Educ Pract*  
22 14 2017;7:133–45. <https://doi.org/10.5430/jnep.v7n1p133>.
- 24 15 18. Lowe NK. The Pain and Discomfort of Labor and Birth. *J Obstet Gynecol Neonatal*  
25 16 *Nurs* 1996;25:82–92. <https://doi.org/10.1111/j.1552-6909.1996.tb02517.x>
- 27 17 19. Rayburn WF, Zuspan FP. Drug therapy in obstetrics and gynecology. 3rd ed. St.  
28 18 Louis: Mosby; 1992. Book
- 31 19 20. Ullman R, Smith LA, Burns E, et al. Parenteral opioids for maternal pain management  
32 20 in labour. *Cochrane Database Syst Rev* 2010;9.  
33 21 <https://doi.org/10.1002/14651858.CD007396.pub2>
- 35 22 21. Pereira RR, Kanhai H, Rosendaal F, et al. Parenteral Pethidine for labour pain relief  
36 23 and substance use disorder : 20-year follow-up cohort study in offspring. *BMJ Open*  
37 24 2012;2:e000719. <http://dx.doi.org/10.1136/bmjopen-2011-000719>
- 39 25 22. Smith LA, Burns E, Cuthbert A. Parenteral opioids for maternal pain management in  
40 26 labour. *Cochrane Database Syst Rev* 2018;6.  
41 27 <https://doi.org/10.1002/14651858.CD007396.pub3>
- 44 28 23. Simkin P. Reducing Pain and Enhancing Progress in labor : A Guide to  
45 29 Nonpharmacologic Methods for Maternity Caregivers. *Birth* 1995;22:161–71.  
46 30 <https://doi.org/10.1111/j.1523-536X.1995.tb00693.x>
- 48 31 24. Cook A, Wilcox G. Pressuring Pain: Alternative Therap for Labor Pain Management.  
49 32 *AWHONN Lifelines* 1997;1:36–41. <https://doi.org/10.1111/j.1552-6356.1997.tb00929.x>
- 52 33
- 53 34 25. Jones LV. Non-pharmacological approaches for pain relief during labour can improve  
54 35 maternal satisfaction with childbirth and reduce obstetric interventions. *Evid Based*  
55 36 *Nurs* 2015;18:70. <http://dx.doi.org/10.1136/eb-2014-101938>

- 1  
2  
3  
4  
5  
6  
7  
8  
9  
10  
11  
12  
13  
14  
15  
16  
17  
18  
19  
20  
21  
22  
23  
24  
25  
26  
27  
28  
29  
30  
31  
32  
33  
34  
35  
36  
37  
38  
39  
40  
41  
42  
43  
44  
45  
46  
47  
48  
49  
50  
51  
52  
53  
54  
55  
56  
57  
58  
59  
60
- 1 26. Busch V, Magerl W, Kern U, et al. The Effect of Deep and Slow Breathing on Pain Perception , Autonomic Activity , and Mood Processing -An Experimental Study. *Pain Med* 2012;13:215–28. <https://doi.org/10.1111/j.1526-4637.2011.01243.x>
  - 4 27. Thomas ME, Dhiwar MS. Effectiveness of Patterned Breathing Technique in Reduction of Pain During First Stage of Labour Among Primigravidas. *Sinhgad E-Journal Nurs* 2011;1:6–8.
  - 7 28. Kaur K, Rana AK, Gainer S. Effect of video on ‘ Breathing Exercises during labour ’ on Pain Perception and Duration of Labour Among Primigravida Mothers. *Nurs Midwifery Res Journa* 2013;9:1–9.
  - 10 29. El-refaye GE, El Nahas EM, Ghareeb HO. Effect of kinesiio taping therapy combined with breathing exercises on childbirth duration and labor pain : a randomized controlled trial. *Bull Fac Phys Ther* 2016;21:23–31. <https://doi.org/10.4103/1110-6611.188026>
  - 13 30. Chuang LL, Lin LC, Cheng P, et al. Effects of a relaxation training programme on immediate and prolonged stress responses in women with preterm labour. *J Adv Nurs* 2011;68:170–80. <https://doi.org/10.1111/j.1365-2648.2011.05765.x>
  - 16 31. Akbarzadeh M, Sharif F, Zare N. The Reduction of Anxiety and Improved Maternal Attachment to Fetuses and Neonates by Relaxation Training in Primigravida Women. *Women’s Heal Bull* 2014;1:e18968. <https://doi.org/10.17795/whb-18968>.
  - 19 32. Nattah FM, Abbas WAK. Assessment of Level of Pain and its Relation with Breathing Exercise in the First Stage of Labour among Primi Mothers at Hilla Teaching Hospital. *Eur J Sci Res* 2016;135:121–8.
  - 22 33. Yuksel H, Cayir Y, Kosan Z, et al. Effectiveness of breathing exercises during the second stage of labor on labor pain and duration : a randomized controlled trial. *J Integr Med* 2017;15:456–61. [https://doi.org/10.1016/S2095-4964\(17\)60368-6](https://doi.org/10.1016/S2095-4964(17)60368-6)
  - 25 34. Mathew AM, Francis F. Effectiveness of Foot Refl exology in Reduction of Labour Pain among Mothers in Labour Admitted at PSG Hospital, Coimbatore. *Int J Nurs Educ* 2016;8:11–5. <https://doi.org/10.5958/0974-9357.2016.00081.7>
  - 28 35. Moghimi-Hanjani S, Mehdizadeh-Tourzani Z, Shoghi, M. The effect of foot reflexology on anxiety, pain, and outcomes of the labor in primigravida women. *Acta Med Iran* 2015;53:507–511.
  - 31 36. Cohen M. The Effectiveness of Massage Therapy A Summary of Evidence-Based Research. Melbourne:Australian Associaiton of Massage Therapy;2011.
  - 33 37. Dolatian M, Hasanpour A, Montazeri S, et al. The effect of reflexology on pain intensity and duration of labor on primiparas. *Iran Red Crescent Med J* 2011;13:475–479.
  - 36 38. Valiani M, Shiran E, Kianpour M, et al. Reviewing the effect of reflexology on the pain

- 1  
2  
3  
4 1 and certain features and outcomes of the labor on the primiparous women. *Iran J Nurs*  
5 2 *Midwifery Res* 2010;15:302–310.
- 6  
7 39. Baljon K, Romli MH, Ismail AH, et al. The Effectiveness Of Complementary And  
8 4 Alternative Medicine Of Massage And Reflexology In Managing Pain And Anxiety  
9 5 Among Primigravidas In Labor: A Systematic Review.[in preparation for submission  
10 6 to a journal]
- 11  
12 7 40. Field T, Hernandez-Rief M, Diego M, et al. Cortisol decreases and serotonin  
13 8 increases following massage therapy. *J Neurosci* 2005;115:1397–413.  
14 9 <https://doi.org/10.1080/00207450590956459>
- 15  
16 10 41. Crowe K, von Baeyer C. Predictors of a Positive Childbirth Experience. *Birth Iss*  
17 11 *Perinat C* 1989;16:59–63. <https://doi.org/10.1111/j.1523-536X.1989.tb00862.x>
- 18  
19  
20 12 42. Ma X, Yue ZQ, Gong ZQ, et al. The effect of diaphragmatic breathing on attention,  
21 13 negative affect and stress in healthy adults. *Front Psychol* 2017;8:1–12.  
22 14 <https://doi.org/10.3389/fpsyg.2017.00874>
- 23  
24 15 43. Bordoni B, Purgol S, Bizzarri A, et al. The Influence of Breathing on the Central  
25 16 Nervous System. *Cureus* 2018;10:1–8. <https://doi.org/10.7759/cureus.2724>
- 26  
27  
28 17 44. McCullough JE, Close C, Liddle SD et al. A pilot randomised controlled trial  
29 18 exploring the effects of antenatal reflexology on labour outcomes. *Midwifery*, 2017;55:  
30 19 137–144.
- 31  
32 20 45. Mathew AM, Francis F. Effectiveness of Foot Reflexology in Reduction of Labour  
33 21 Pain among Mothers in Labour Admitted at PSG Hospital, Coimbatore. *Int J Nurs Educ*  
34 22 2016;8:11–15.
- 35  
36  
37 23 46. Embong NH, Soh YC, Ming LC, et al. Revisiting reflexology: Concept, evidence,  
38 24 current practice, and practitioner training. *J Tradit Complement Altern Med*  
39 25 2015;5:197–206.
- 40  
41 26 47. Tiran D, Chummun H. The physiological basis of reflexology and its use as a potential  
42 27 diagnostic tool. *Complement Ther Clin Pract* 2005;11:58–64.  
43 28 <https://doi.org/10.1016/j.ctnm.2004.07.007>
- 44  
45 29 48. Levy I, Attias S, Lavee TS, et al. The effectiveness of foot reflexology in reducing  
46 30 anxiety and duration of labor in primiparas: An open-label randomized controlled  
47 31 trial. *Complement Ther Clin Pract* 2020;38:101085.  
48 32 <https://doi.org/10.1016/j.ctcp.2019.101085>
- 49  
50  
51 33 49. Yılar Erkek Z, Aktas S. The effect of foot reflexology on the anxiety levels of women  
52 34 in labor. *J Altern Complement Med Medicine*, 2018;24:352–360.  
53 35 <https://doi.org/10.1089/acm.2017.0263>
- 54  
55 36 50. Tiran D, Chummun H. The physiological basis of reflexology and its use as a potential

- 1  
2  
3 1 diagnostic tool. *Complement Ther Clin Pract* 2005;11:58–64.  
4 2 <https://doi.org/10.1016/j.ctnm.2004.07.007>.  
5  
6  
7 3 51. Tappan FM, Benjamin PJ. Tappan's handbook for healing massage techniques. Classic,  
8 4 Holistic, and Emerging Methods. 3rd Ed. Stamford, Conn.: Appleton & Lange.; 1998.  
9  
10 5 52. Tiran D, Evans M. Theoretical background to structural reflex zone therapy. *Pract*  
11 6 *Manag Pain*; 2010.  
12  
13 7 53. Embong NH, Soh YC, Ming LC, et al. Revisiting reflexology: Concept, evidence,  
14 8 current practice, and practitioner training. *J Tradit Complement Med* 2015;5:197–206.  
15 9 <https://doi.org/10.1016/j.jtcme.2015.08.008>  
16  
17  
18 10 54. Poole H, Glenn S, Murphy P. A randomised controlled study of reflexology for the  
19 11 management of chronic low back pain. *Eur J Pain* 2007;11:878–87.  
20 12 <https://doi.org/10.1016/j.ejpain.2007.01.006>  
21  
22 13 55. Keet L. Reflexology Bible: The Definitive Guide to Reflexology (Godsfield Bible  
23 14 Series). First Edit. London, Great Britain: Octopus publishing group; 2008. Book  
24  
25 15 56. Roudaut Y, Lonigro A, Coste B, et al. Touch sense: functional organization and  
26 16 molecular determinants of mechanosensitive receptors. *Channels* 2012;6:234–45.  
27 17 <https://doi.org/10.4161/chan.22213>  
28  
29  
30 18 57. Goats GC. Massage--the scientific basis of an ancient art: Part 2. Physiological and  
31 19 therapeutic effects. *Br J Sports Med* 1994;28:153–6.  
32 20 <http://dx.doi.org/10.1136/bjism.28.3.153>  
33  
34 21 58. Basbaum AI, Fields HL. Endogenous pain control mechanisms: Review and  
35 22 hypothesis. *Ann Neurol* 1978;4:451–62. <http://dx.doi.org/10.1002/ana.410040511>  
36  
37  
38 23 59. Weerapong P, Hume PA, Kolt GS. The mechanisms of massage and effects on  
39 24 performance, muscle recovery and injury prevention. *Sport Med* 2005;35:235–56.  
40 25 <http://dx.doi.org/10.2165/00007256-200535030-00004>  
41  
42 26 60. Vakilian K, Keramat A. The Effect of the Breathing Technique With and Without  
43 27 Aromatherapy on the Length of the Active Phase and Second Stage of Labor. *Nurs*  
44 28 *Midwifery Stud* 2013;2. <http://dx.doi.org/10.5812/nms.9886>  
45  
46  
47 29 61. Morhenn V, Beavin LE, Zak PJ. Massage Increases Oxytocin and Reduces  
48 30 Adrenocorticotropin Hormone in Humans. *Altern Ther* 2012;18:11–8.  
49  
50 31 62. Diego MA, Field T. Moderate Pressure Massage Elicits a Parasympathetic Nervous  
51 32 System Response. *Int J Neurosci* 2009;119:630–8.  
52 33 <http://dx.doi.org/10.1080/00207450802329605>  
53  
54 34 63. McCullough JE, Liddle SD, Sinclair M, et al. The Physiological and Biochemical  
55 35 Outcomes Associated with a Reflexology Treatment : A Systematic Review. Evidence-



- 1  
2  
3  
4 1 Based Complementary *Altern Med* 2014;2014. <http://dx.doi.org/10.1155/2014/502123>
- 5  
6 2 64. Mccullough JEM, Liddle SD, Close C, et al. Reflexology: a randomised controlled trial  
7 3 investigating the effects on beta-endorphin, cortisol and pregnancy related stress.  
8 4 *Complement Ther Clin Pract* 2018; 31:76–84.
- 9  
10 5 65. Li Q, Becker B, Wernicke J, et al. Foot massage evokes oxytocin release and activation  
11 6 of orbitofrontal cortex and superior temporal sulcus. *Psychoneuroendocrinology*  
12 7 2018;101:193–203. <http://dx.doi.org/10.1016/j.psyneuen.2018.11.016>
- 13  
14 8 66. Bell AF, Erickson EN, Carter CS. Beyond Labor: The Role of Natural and Synthetic  
15 9 Oxytocin in The Transition To Motherhood. *J Midwifery Womens Heal* 2015;59:35–  
16 10 42. <http://dx.doi.org/10.1111/jmwh.12101>
- 17  
18 11 67. Hu J, Brettle A, Jiang Z, et al. A systematic review and meta-analysis of the effect of  
19 12 massage therapy in pain relief during labor. *J Nurs* 2017;6:1–14.  
20 13 <http://dx.doi.org/10.18686/jn.v6i4.130>
- 21  
22 14 68. Huntley AL, Coon JT, Ernst E. Complementary and alternative medicine for labor  
23 15 pain : A systematic review. *Am J Obstet Gynecol* 2004;191:36–44. <http://dx.doi.org/10.1016/j.ajog.2003.12.008>
- 24 16  
25  
26 17 69. Ranjbaran M, Khorsandi M, Matourypour P, et al. Effect of Massage Therapy on Labor  
27 18 Pain Reduction in Primiparous Women A Systematic Review and Meta-analysis of  
28 19 Randomized Controlled Clinical Trials in Iran. *Iran J Nurs Midwifery Res*  
29 20 2017;22:257–61.
- 30  
31  
32 21 70. Smith CA, Levett KM, Collins CT, et al. Massage , reflexology and other manual  
33 22 methods for pain management in labour ( Review ). *Cochrane Database Rev.* 2012.  
34 23 (2018)
- 35  
36  
37 24 71. Kirkham M. The Midwife-Mother Relationship. 2nd ed. Hampshire: Red Globe Press;  
38 25 2000. book
- 39  
40  
41 26 72. Levett KM, Smith CA, Bensoussan A, et al. The Complementary Therapies for Labour  
42 27 and Birth Study: Making sense of labour and birth – experiences of women, partners  
43 28 and midwives of a complementary medicine antenatal education course. *Midwifery*  
44 29 2016;40:124–131. <http://dx.doi.org/10.1016/j.midw.2016.06.011>
- 45  
46  
47 30 73. Ministry of Health Saudi Arabia. Maternity and Children Hospital Makkah. 2013.  
48 31 <http://www.testonservers.com/mch/> (accessed November 27, 2018).
- 49  
50 32 74. Altaweli RF, McCourt C, Baron M. Childbirth care practices in public sector facilities  
51 33 in Jeddah, Saudi Arabia: A descriptive study. *Midwifery* 2014;30:899–909.  
52 34 <http://dx.doi.org/10.1016/j.midw.2014.03.006>
- 53  
54 35 75. Farine D, Seaward PG. When it comes to pregnant women sleeping, is left right? *J*  
55 36 *Obstet Gynaecol Can* 2007;29:841–842.

- 1  
2  
3 1 76. Bonnel AM, Boureau F. Labor Pain Assessment : Validity of a Behavioral Index. *Pain*  
4 2 1985;22:81–90. [https://doi.org/10.1016/0304-3959\(85\)90150-2](https://doi.org/10.1016/0304-3959(85)90150-2)  
5  
6  
7 3 77. Chang M, Wang S, Chen C. Effects of massage on pain and anxiety during labour : a  
8 4 randomized controlled trial in Taiwan. *J Adv Nurs* 2002;38:68-73.  
9  
10 5 78. Mårtensson L, Bergh I. Effect of treatment for labor pain : Verbal reports versus visual  
11 6 analogue scale scores - A prospective randomized study. *Int J Nurs Midwifery*  
12 7 2011;3:43–7.  
13  
14 8 79. Bahammam MA, Hassan MH. Validity and reliability of an Arabic version of the  
15 9 modified dental anxiety scale in Saudi adults. *Saudi Med J* 2014;35:1384.  
16 10 <http://dx.doi.org/10.2466/pr0.1997.80.3.947>  
17  
18  
19 11 80. Hawker GA, Mian S, Kendzerska T, et al. Measures of adult pain: Visual analog scale  
20 12 for pain (vas pain), numeric rating scale for pain (nrs pain), mcgill pain questionnaire  
21 13 (mpq), short-form mcgill pain questionnaire (sf-mpq), chronic pain grade scale (cpgs),  
22 14 short form-36 bodily pain scale (sf-36 bps), and measure of intermittent and constant  
23 15 osteoarthritis pain (icoap). *Arthritis Care Res* 2011;63:S240-S252.  
24 16 [doi:10.1002/acr.20543](https://doi.org/10.1002/acr.20543)  
25  
26  
27 17 81. Taghinejad H, Delpisheh A, Suhrabi Z. Comparison between massage and music  
28 18 therapies to relieve the severity of labor pain. *Womens Health* 2010;6:377–381.  
29 19 <https://doi.org/10.2217/WHE.10.15>  
30  
31 20 82. Jensen MP, Karoly P, Braver S. The Measurement of Clinical Pain Intensity : a  
32 21 Comparison of Six Methods. *Pain Res Manag* 1986;27:117–26.  
33 22 [https://doi.org/10.1016/0304-3959\(86\)90228-9](https://doi.org/10.1016/0304-3959(86)90228-9)  
34  
35  
36 23 83. Durat G, Çulhacik GD, Doğu Ö, et al. The development of an anxiety assessment scale  
37 24 for pregnant women in labor. *Saudi Med J* 2018;39:609–14.  
38 25 <http://dx.doi.org/10.15537/smj.2018.6.22266>  
39  
40 26 84. Wei CK, Leng CY, Lin SKS. The use of the Visual Analogue Scale for the assessment  
41 27 of labour pain: a systematic review. *JBI Database Syst Rev Implement* 2010;8:972–  
42 28 1015  
43  
44 29 85. Harvey S, Rach D, Stainton MC, et al. Evaluation of satisfaction with midwifery  
45 30 care. *Midwifery* 2002;18:260–267. <http://dx.doi.org/10.1054/midw.2002.0317>  
46  
47  
48 31 86. Bublitz MH, Bourjeily G, D’Angelo C, et al. Maternal sleep quality and diurnal cortisol  
49 32 regulation over pregnancy. *Behav Sleep Med* 2018;16:282–293.  
50 33 <https://doi.org/10.1080/15402002.2016.1210147>  
51  
52 34 87. Larsson CA, Gullberg B, Råstam L, et al. Salivary cortisol differs with age and sex  
53 35 and shows inverse associations with WHR in Swedish women: a cross-sectional  
54 36 study. *BMC endocr disord* 2009;9:16.

- 1  
2  
3 1 88. Sundaram, L., Swaminathan, S., Ranjakumar, T., Ashraf, R., & Das, T. K. (2017).  
4 2 Intraocular pressure variation in pregnancy: a prospective study. *Int J Reprod*  
5 3 *Contracept Obstet Gynecol*, 5, 1406–1409. <http://dx.doi.org/10.18203/2320->  
6 4 [1770.ijrcog20161294](http://dx.doi.org/10.18203/2320-1770.ijrcog20161294)
- 8  
9 5 89. Romano A, Tempesta B, Micioni Di Bonaventura MV. et al. From autism to eating  
10 6 disorders and more: the role of oxytocin in neuropsychiatric disorders. *Fron Neurosci*  
11 7 2016;9:497. <https://doi.org/10.3389/fnins.2015.00497>
- 13  
14 8 90. Uvnäs-Moberg K, Ekström-Bergström A, Berg M. et al. Maternal plasma levels of  
15 9 oxytocin during physiological childbirth—a systematic review with implications for  
16 10 uterine contractions and central actions of oxytocin. *BMC Pregnancy Childb*  
17 11 2009;19:285.
- 18  
19 12 91. Snyder M, Wieland J. Complementary and alternative therapies : what is their place in  
20 13 the management of chronic pain? *Nurs Clin North Am* 2003;38:495–508.  
21 14 [http://dx.doi.org/10.1016/S0029-6465\(02\)00098-1](http://dx.doi.org/10.1016/S0029-6465(02)00098-1)
- 23  
24 15 92. Sekhavat L, Behdad S. The effects of meperidine analgesia during labor on fetal heart  
25 16 rate. *Int J Biomed Sci* 2009;5:59.
- 26  
27 17 93. Reynolds F. The effects of maternal labour analgesia on the fetus. *Best Pract Res Clin*  
28 18 *Obstet Gynaecol* 2010;24:289–302. <https://doi.org/10.1016/j.bpobgyn.2009.11.003>
- 29  
30 19 94. Whitburn LY, Jones LE, Davey M, et al. The nature of labour pain : An updated review  
31 20 of the literature. *Women and Birth* 2018;32:28-38.  
32 21 <http://dx.doi.org/10.1016/j.wombi.2018.03.004>
- 34  
35 22 95. Woo AK. Depression and Anxiety in Pain. *Br J Pain* 2010;4:8–12.  
36 23 <https://doi.org/10.1177/204946371000400103>
- 37  
38 24 96. Turner, J. A., Deyo, R. A., Loeser, J. D., Von Korff, M., & Fordyce, W. E. (1994). The  
39 25 importance of placebo effects in pain treatment and research. *J Am Med*  
40 26 *Assoc* 1994;271:1609–1614. <https://doi.org/10.1001/jama.1994.03510440069036>
- 41  
42 27 97. Brook CA, Schmidt LA. Social anxiety disorder: A review of environmental risk  
43 28 factors. *Neuropsychiatr Dis Treat* 2008;4:123–43.

## Figure Legend

Figure 1 Mechanisms of action Reflexology therapy.

Figure 2 Mechanisms of action Massage therapy.

Figure 3 CONSORT flow diagram.

Figure 4 Research personnel training and responsibility matrix.

Figure 5 (a) shows the timeline of outcomes measurement in the intervention group; (b) shows the timeline of outcomes measurement in the control group.

1  
2  
3 **Table Legend**  
4

5 Table 1 Steps of the Intervention.  
6

7  
8 Table 2 Summary of Primary Outcomes and Measurement Tools.  
9

10 Table 3 Summary of Secondary Outcomes and Measurement Tools.  
11  
12  
13  
14  
15  
16  
17  
18  
19  
20  
21  
22  
23  
24  
25  
26  
27  
28  
29  
30  
31  
32  
33  
34  
35  
36  
37  
38  
39  
40  
41  
42  
43  
44  
45  
46  
47  
48  
49  
50  
51  
52  
53  
54  
55  
56  
57  
58  
59  
60

For peer review only

**Table 1: Steps of the Intervention**

| <b>Steps</b>                                                          | <b>Process</b>                                                                                                                                                                                        |
|-----------------------------------------------------------------------|-------------------------------------------------------------------------------------------------------------------------------------------------------------------------------------------------------|
| 1.                                                                    | Prepare the equipment.                                                                                                                                                                                |
| 2.                                                                    | Explain the procedure to the primigravida & advise her to lay on her left side* with a pillow on the side of her stomach.                                                                             |
| <b>Breathing Exercise Intervention for 5 minutes</b>                  |                                                                                                                                                                                                       |
| 3.                                                                    | Ask the primigravida to perform deep breathing by inhaling slowly through the nose for two seconds and then consciously release the air by breathing out for another two seconds during contractions. |
| 4.                                                                    | Rest for 1–3 seconds, then repeat the same technique for a total of 5 minutes. Then proceed to the reflexology as described below.                                                                    |
| <b>Reflexology Intervention Technique for 10 minutes on each foot</b> |                                                                                                                                                                                                       |
| 5.                                                                    | Put a towel under the right foot and cover the left leg.                                                                                                                                              |
| 6.                                                                    | Apply warm oil over the right foot and roll it left to right 5 times.                                                                                                                                 |
| 7.                                                                    | Press palms on the Achilles heel and knead the ankle 5 times.                                                                                                                                         |
| 8.                                                                    | Knead the thumb pads on the central and bottom parts of the heel 5 times.                                                                                                                             |
| 9.                                                                    | Knead the foot following the CIUW** shape on the lateral and intermediate aspects of the foot followed by the MST*** shape 5 times.                                                                   |
| 10.                                                                   | Press the wooden reflexology stick on the toes, forefoot, mid-foot, and hind-foot 5 times.                                                                                                            |
| 11.                                                                   | Repeat Steps 5–11 on the opposite side. Then proceed to the next lower limbs massage.                                                                                                                 |
| <b>Lower Limbs Massage for 2 minutes 30 seconds on each leg</b>       |                                                                                                                                                                                                       |
| 12.                                                                   | Effleurage massage on the whole, lower flexed leg by using two hands 3 times.                                                                                                                         |
| 13.                                                                   | Half effleurage massage from the heel to the popliteal area 3 times.                                                                                                                                  |
| 14.                                                                   | Palm and thumb kneading on the gastrocnemius muscle over the lateral & medial sides, followed by scooping on the gastrocnemius, each step 3 times.                                                    |
| 15.                                                                   | Thumb kneading on the hamstring muscle over the medial, intermediate, and lateral sides 3 times.                                                                                                      |
| 16.                                                                   | Repeat Steps 12–17 on the right leg. Then proceed to lower back massage.                                                                                                                              |
| <b>Lower Back Massage for 15 minutes</b>                              |                                                                                                                                                                                                       |
| 17.                                                                   | Effleurage massage from the sacrum to the shoulders and deltoids 3 times.                                                                                                                             |
| 18.                                                                   | Thumb kneading & pressure over the lateral sides of the lumbar area of the spine 3 times.                                                                                                             |
| 19.                                                                   | Apply fist knuckling motion and thumb kneading on the lower back, side by side, 3 times. Then proceed to upper back massage.                                                                          |

---

**Upper Back Massage for 15 minutes**

20. Effleurage massage followed by palm kneading from the lumbar region to trapezius laterally 3 times.
  21. Thumb kneading over both sides of erector spinae, then draining between the ribs towards the armpit areas 3 times.
  22. Apply squeeze on the deltoid muscle with draining towards the armpit 3 times.
  23. Apply finger kneading on trapezius muscle, followed by fist scooping 3 times.
  24. Finally, press on the neck and shoulder area on both sides 3 times.
- 

\* The left side position allows maximum blood flow to the placenta, because it applies less pressure from the foetus on the vena cava [75].

\*\*CIUW shape: C-shape; I-shape; U-shape, and W-shape. These shapes indicate the orientation and placement of the palms and knuckles of the therapist.

\*\*\*MST shape: M-shape, S-shape, and T-shape. These shapes indicate the orientation and placement of the palms and knuckles of the therapist.

**Table 2: Summary of Primary Outcomes and Measurement Tools**

| Primary Outcomes | Tools  | Psychometric tests                                                                                                                                                                                                                                                  | Method of assessment                                                                                                                                                     |
|------------------|--------|---------------------------------------------------------------------------------------------------------------------------------------------------------------------------------------------------------------------------------------------------------------------|--------------------------------------------------------------------------------------------------------------------------------------------------------------------------|
| <b>Pain</b>      | PBI    | 100% inter-rater reliability<br><i>r</i> coefficient was 0.45, 0.50, and 0.44 between PBI and PPI [76, 77].                                                                                                                                                         | Assessor-rated [76]: five-category behavioural observation scale                                                                                                         |
|                  | VAS    | Moderate correlation ( <i>r</i> = 0.54) with the verbal rating and is considered valuable when mixed with other tools [78, 79]; 0.97 intraclass correlation coefficient of 24 hours interval test-retest reliability [80].                                          | Self-reported VAS [81], contains six different coloured parts anchored by two extremes of 'no pain' and excruciating pain to mark on the line-map by primigravidae [82]. |
| <b>Anxiety</b>   | AASPWL | > 0.8 concordance test content validity index Kendall's <i>W</i> between the opinions of the experts ( <i>W</i> = 0.090; <i>P</i> = 0.080) with Cronbach's alpha level of 0.77 [83]; significantly correlated ( <i>r</i> = 0.369) with the Beck Anxiety Scale [83]. | Questionnaire consists of nine items [83], on a 5-point scale: the higher the mean score the higher the anxiety                                                          |

PBI= Present Behavioural Intensity; VAS= Visual Analog Scale; AASPWL= Anxiety Assessment Scale for Pregnant Women in Labour.



**Table 3 Summary of Secondary Outcomes and Measurement Tools**

| <b>Secondary outcomes</b>             | <b>Measurement tools</b>                  | <b>Method of assessment</b>                                                                                                                         |
|---------------------------------------|-------------------------------------------|-----------------------------------------------------------------------------------------------------------------------------------------------------|
| <b>Maternal stress hormones level</b> | Blood sample for ACTH, cortisol, oxytocin | Blood sample will be drawn from the median cubital vein during the insertion of IV cannula (routine care)                                           |
| <b>Maternal vital sign</b>            | Thermometer<br>Sphygmomanometer           | Recorded on the vital sign monitoring chart and cardiocograph.                                                                                      |
| <b>FHR</b>                            | Cardiocograph                             | Recorded on the vital sign monitoring chart, cardiocograph chart, and partograph.                                                                   |
| <b>Duration of labour</b>             | Partograph                                | Partograph at two separate time intervals, a sum of labour duration from 3 to 6 cm of cervical dilatation and from 6 cm to delivery of the placenta |
| <b>Neonatal Apgar score</b>           | Apgar score table                         | Taken from the delivery room medical record                                                                                                         |
| <b>Maternal satisfaction</b>          | Six Simple Questions [85].                | Self-reported 7-point scale (1-7) from “strongly disagree to “strongly agree” with higher scores signifying the higher level of satisfaction        |

ACTH= adrenocorticotropic hormone

# Mechanisms of the Reflexology

pressure on certain reflex points

1  
2  
3  
4  
5  
6  
7  
8  
9  
10  
11  
12  
13  
14  
15  
16  
17  
18  
19  
20  
21  
22  
23  
24  
25  
26  
27  
28  
29  
30  
31  
32  
33  
34  
35  
36  
37  
38  
39  
40  
41  
42  
43  
44  
45  
46

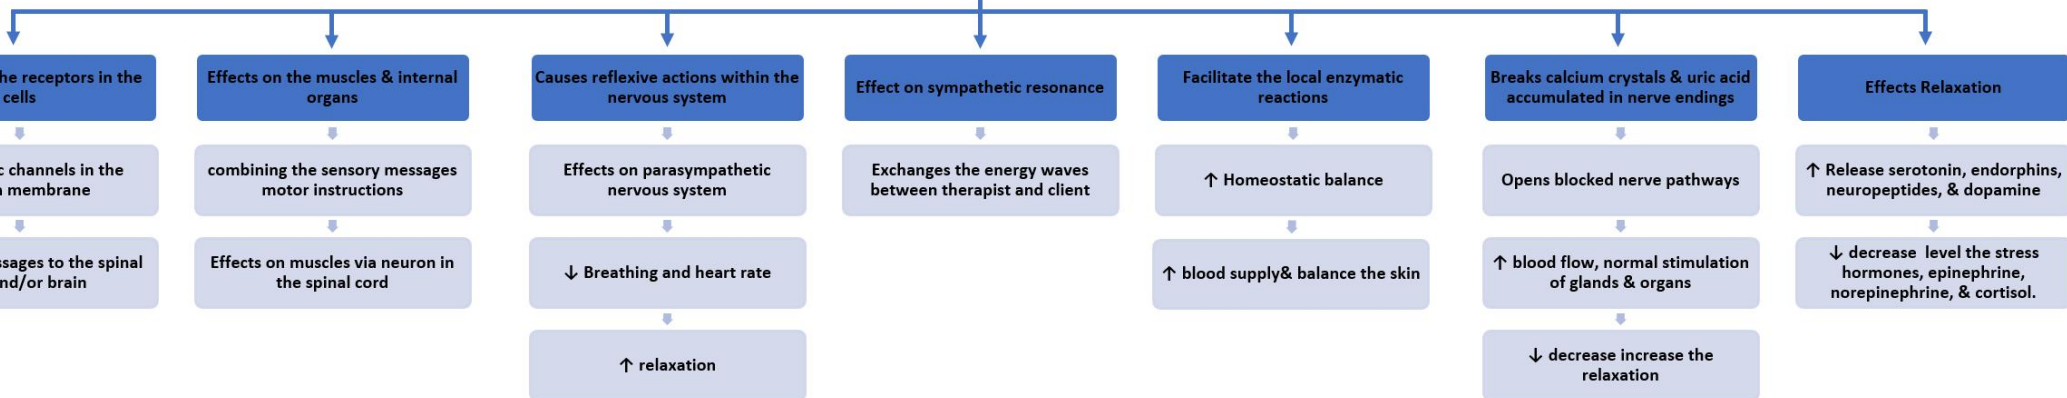

# Mechanisms of Massage

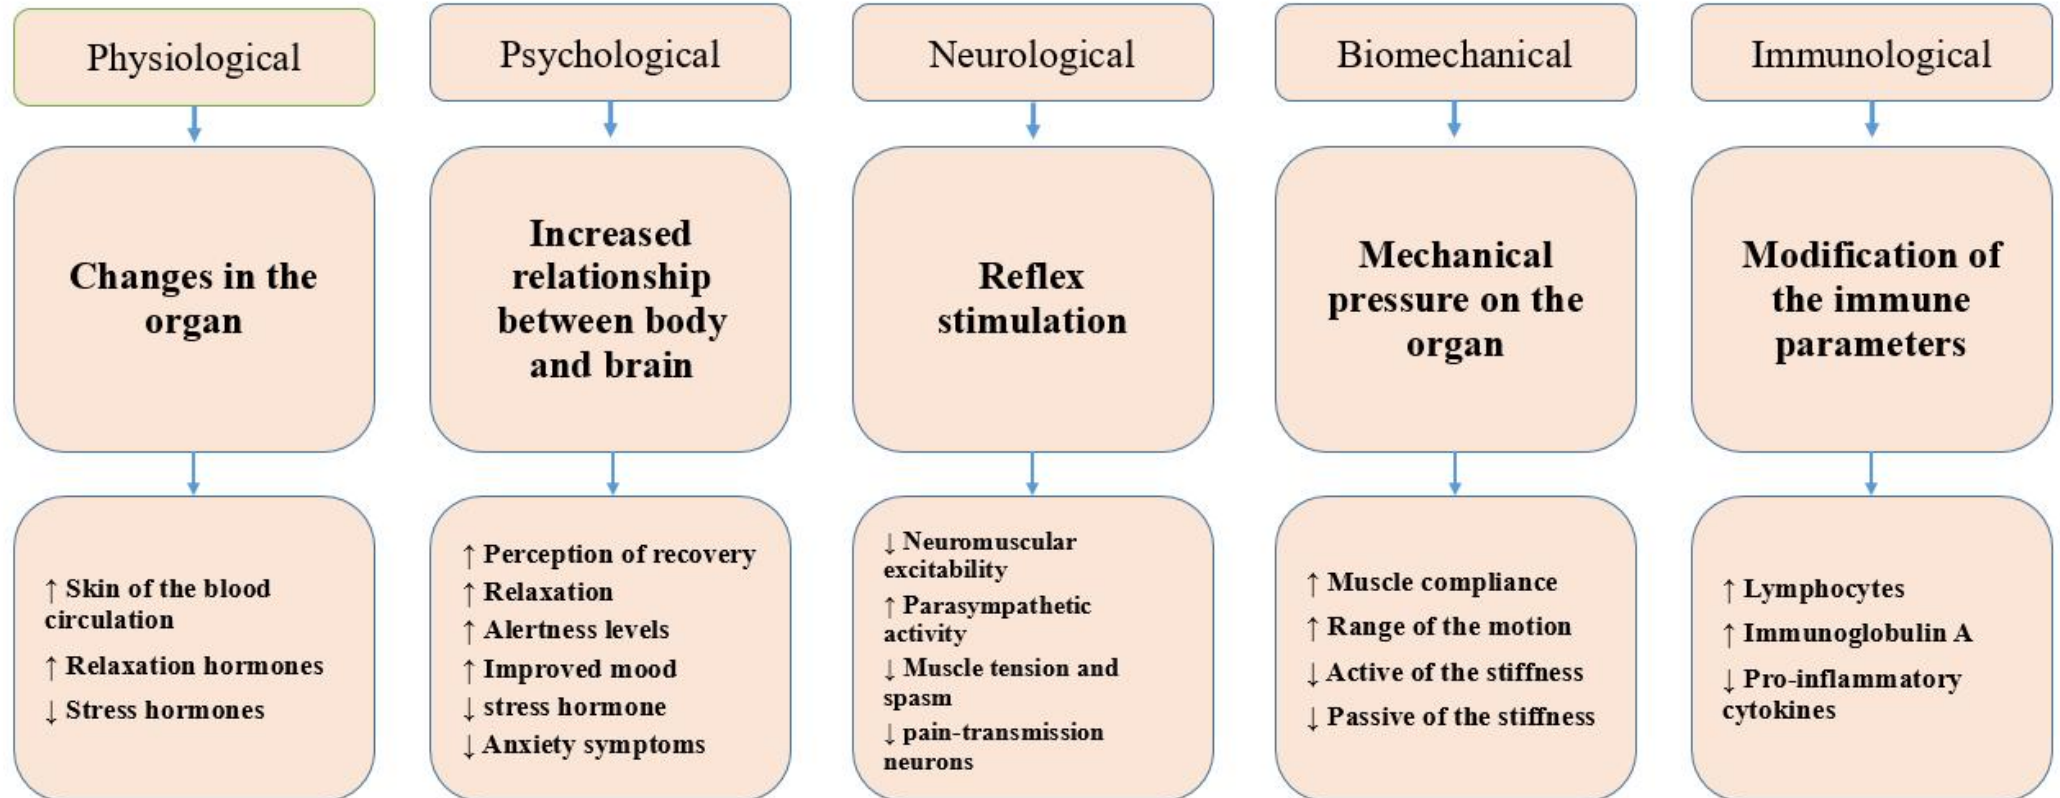

1  
2  
3  
4  
5  
6  
7  
8  
9  
10  
11  
12  
13  
14  
15  
16  
17  
18  
19  
20  
21  
22  
23  
24  
25  
26  
27  
28  
29  
30  
31  
32  
33  
34  
35  
36  
37  
38  
39  
40  
41  
42  
43  
44  
45  
46  
47  
48  
49  
50  
51  
52  
53  
54  
55  
56  
57  
58  
59  
60

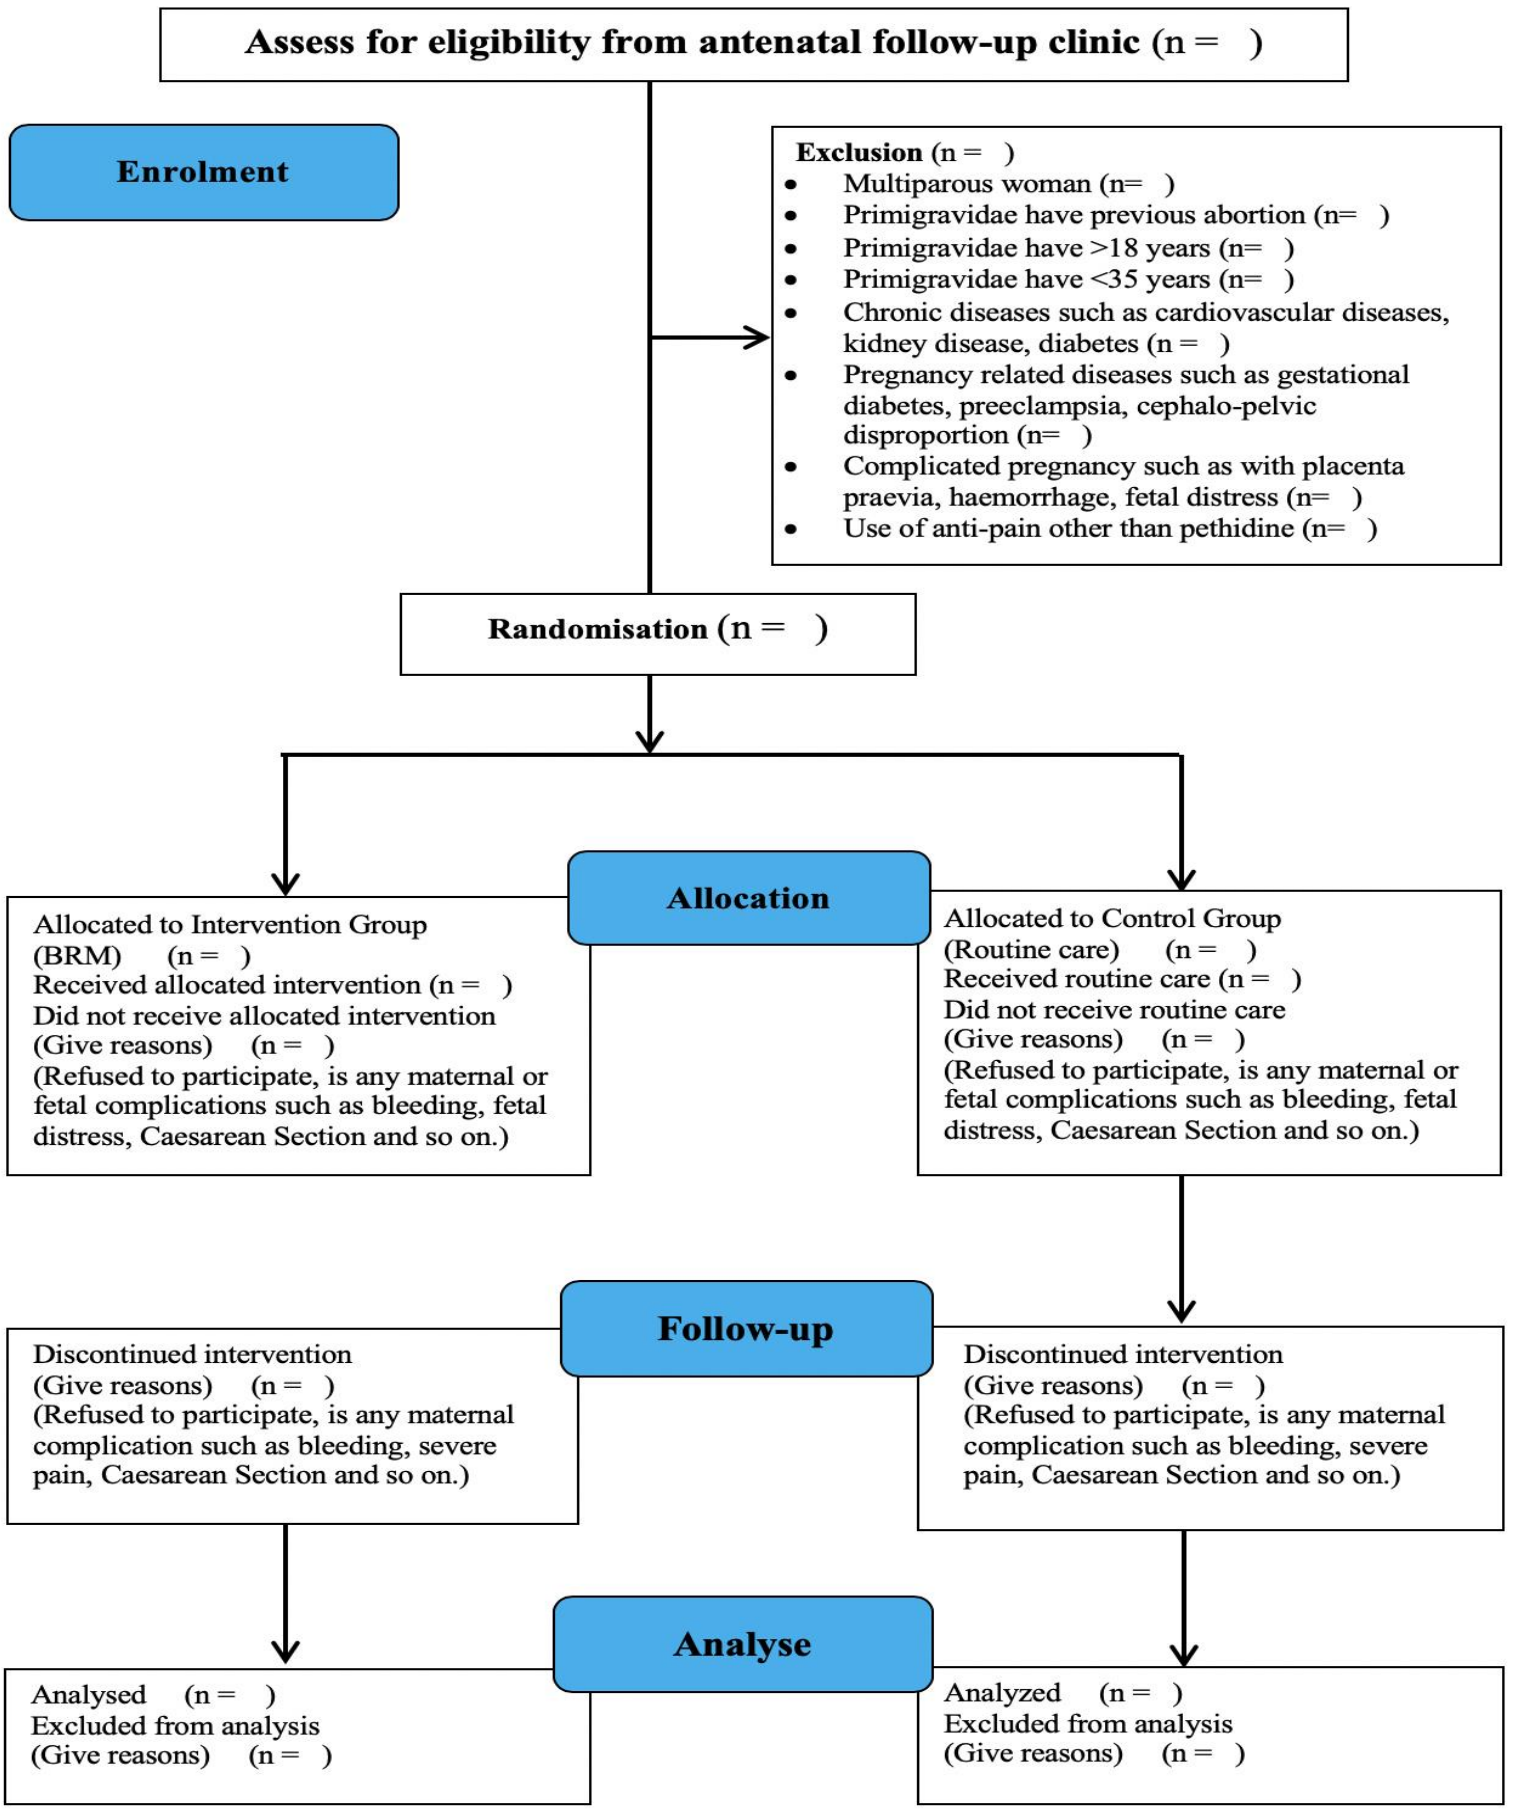

### 13 Research Assistants + 1 Principal Investigator

- Recruitment of nursing students who completed a 5-year nursing degree training and awaiting their job posting.
- Assigned to their preferred and suitable roles (coordinators, the outcome assessors, or massage therapists).
- One week training as research assistants in their respective roles.
- A pilot study to ensure their competency.
- Written study manual as a reference guide to be provided to all research assistants.

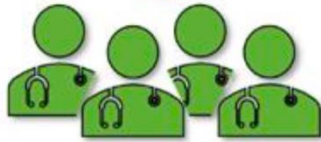

Research coordinators  
(4 pax.)

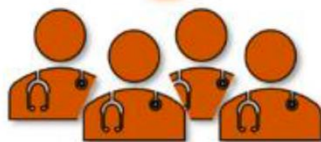

Outcome Assessors  
(4 pax.)

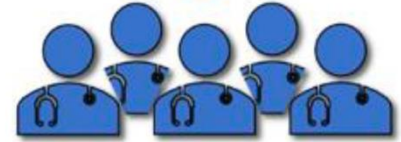

Massage therapists  
(5 pax.)

- Recruit eligible primigravidae at the antenatal clinic deliver brief health education on labour pain management at the antenatal clinic for 6 weeks.
- Reassess the primigravidae women's consent and eligibility,
- Allocate the women to either the intervention or control group.
- Alert the massage therapists and outcome assessors when the cervical dilatation of the trial participant reaches 6 cm.
- Distribute outcomes assessment record form to the outcome assessors.
- Encode the questionnaire package according to the participant's allocated group.
- Organise the entry sequence for the outcome assessors and the massage therapists to enter the delivery rooms according to the scheduled time.

- Assess and fill-up questionnaires:
  - Present behavioural Intensity (PBI).
  - Visual Analog Scale (VAS).
  - Anxiety Assessment Scale for primigravidae Women in labour (AASPWL),
  - Six Simple Questions (SSQ) for maternal satisfaction.
- Retrieve the maternal vital signs, fetal heart rate, duration of labour, and neonatal Apgar score from the health records.
- Record all the outcomes in the designated form.

- Perform breathing exercise, foot reflexology and back massage during labour (BRM).
  - Breathing exercise (5min).
  - Foot Reflexology (10 min on each foot),
  - Back massage (35min).

Sub-divided into two shifts per day to ensure all the eligible and consented primigravidae will be captured

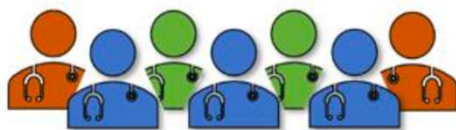

Day Shift (9 am - 9pm)

2 Coordinators, 3 Massage therapists, and 2 Outcome Assessors

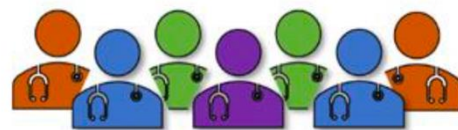

Night Shift (9 pm - 9 am)

2 Coordinators, 2 Massage therapists, 2 Outcome Assessors, and Principal Investigator

1  
2  
3  
4  
5  
6  
7  
8  
9  
10  
11  
12  
13  
14  
15  
16  
17  
18  
19  
20  
21  
22  
23  
24  
25  
26  
27  
28  
29  
30  
31  
32  
33  
34  
35  
36  
37  
38  
39  
40  
41  
42  
43  
44  
45  
46

Intervention Group **a**

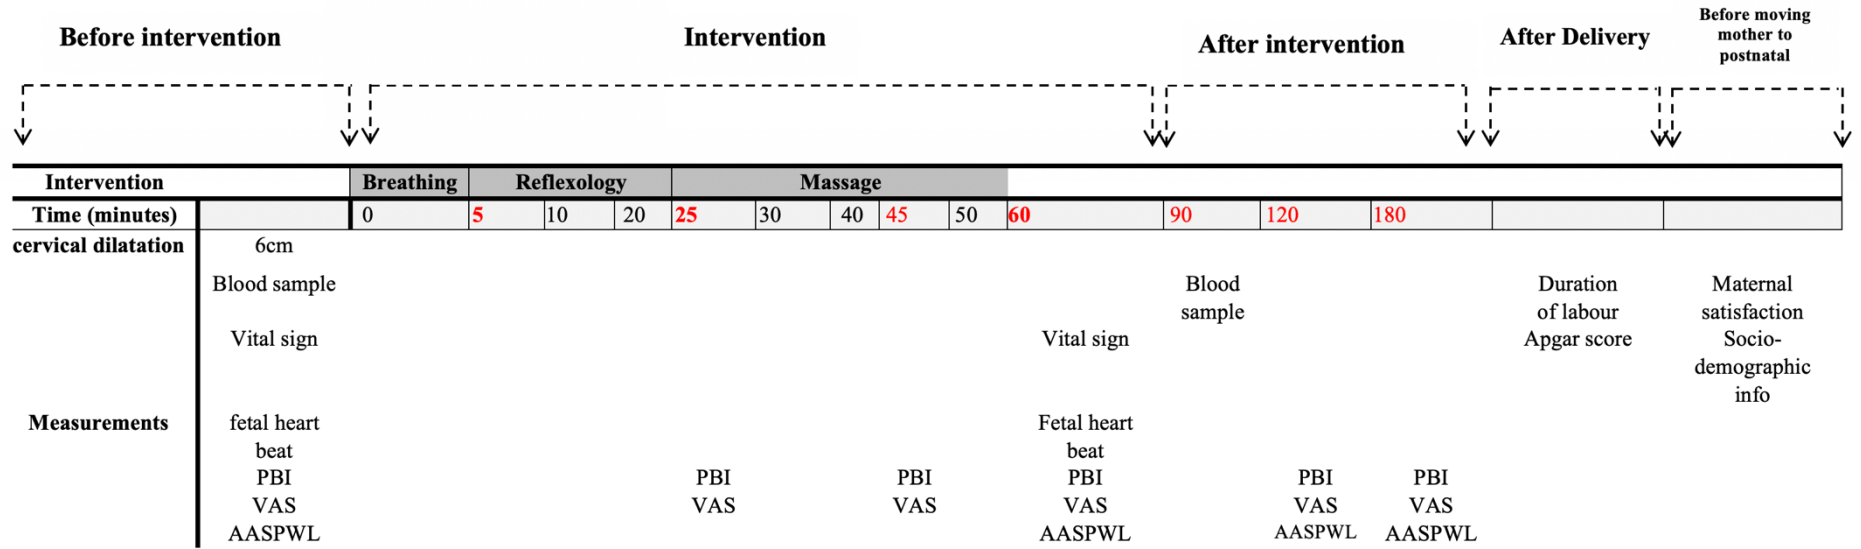

Control Group **b**

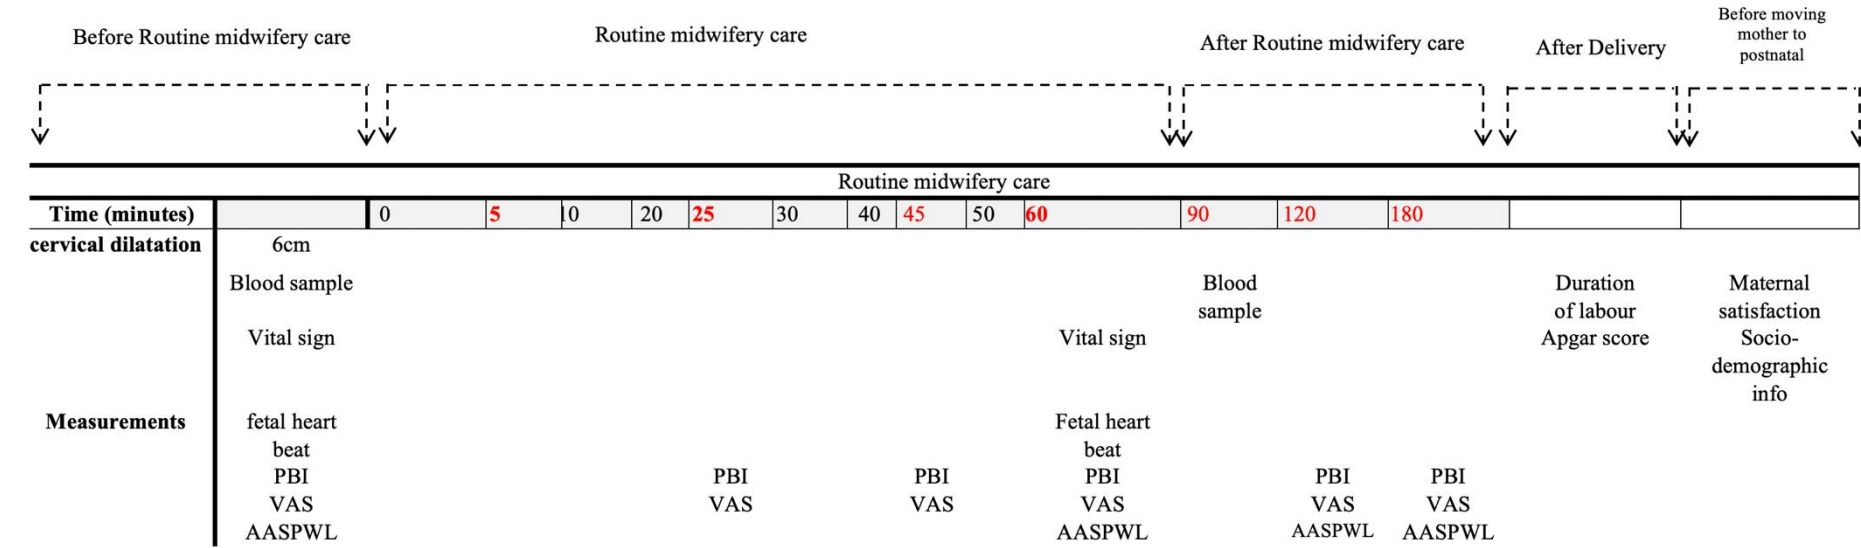

# BMJ Open

## Effectiveness of Breathing Exercises, Foot Reflexology and Back Massage (BRM) on Labour Pain, Anxiety, Duration, Satisfaction, Stress Hormones, and New-born Outcomes among Primigravidae during the First Stage of Labour in Saudi Arabia: A Study Protocol for a Randomised Controlled Trial

|                                 |                                                                                                                                                                                                                                                                                                                                                                                                                                                                                                                                                                                                                                                                                      |
|---------------------------------|--------------------------------------------------------------------------------------------------------------------------------------------------------------------------------------------------------------------------------------------------------------------------------------------------------------------------------------------------------------------------------------------------------------------------------------------------------------------------------------------------------------------------------------------------------------------------------------------------------------------------------------------------------------------------------------|
| Journal:                        | <i>BMJ Open</i>                                                                                                                                                                                                                                                                                                                                                                                                                                                                                                                                                                                                                                                                      |
| Manuscript ID                   | bmjopen-2019-033844.R2                                                                                                                                                                                                                                                                                                                                                                                                                                                                                                                                                                                                                                                               |
| Article Type:                   | Protocol                                                                                                                                                                                                                                                                                                                                                                                                                                                                                                                                                                                                                                                                             |
| Date Submitted by the Author:   | 14-Apr-2020                                                                                                                                                                                                                                                                                                                                                                                                                                                                                                                                                                                                                                                                          |
| Complete List of Authors:       | Baljon, Kamilya; Universiti Putra Malaysia Faculty of Medicine and Health Sciences, Department of Family Medicine; Umm Al-Qura University, Department of Nursing<br>Romli, Muhammad Hibatullah ; Universiti Putra Malaysia Faculty of Medicine and Health Sciences, Department of Nursing & Rehabilitation<br>Ismail @ Daud, Adibah Hanim; Universiti Putra Malaysia Faculty of Medicine and Health Sciences, Department of Family Medicine<br>Khuan, Lee; Universiti Putra Malaysia Faculty of Medicine and Health Sciences, Department of Nursing & Rehabilitation<br>Chew, Boon; Universiti Putra Malaysia Faculty of Medicine and Health Sciences, Department of Family Medicine |
| <b>Primary Subject Heading</b>: | Complementary medicine                                                                                                                                                                                                                                                                                                                                                                                                                                                                                                                                                                                                                                                               |
| Secondary Subject Heading:      | Complementary medicine, Nursing, Emergency medicine, General practice / Family practice, Public health                                                                                                                                                                                                                                                                                                                                                                                                                                                                                                                                                                               |
| Keywords:                       | Breathing exercises, Reflexology, Massage, Primigravidae, Labour pain, Stress hormones                                                                                                                                                                                                                                                                                                                                                                                                                                                                                                                                                                                               |
|                                 |                                                                                                                                                                                                                                                                                                                                                                                                                                                                                                                                                                                                                                                                                      |

SCHOLARONE™  
Manuscripts



I, the Submitting Author has the right to grant and does grant on behalf of all authors of the Work (as defined in the below author licence), an exclusive licence and/or a non-exclusive licence for contributions from authors who are: i) UK Crown employees; ii) where BMJ has agreed a CC-BY licence shall apply, and/or iii) in accordance with the terms applicable for US Federal Government officers or employees acting as part of their official duties; on a worldwide, perpetual, irrevocable, royalty-free basis to BMJ Publishing Group Ltd ("BMJ") its licensees and where the relevant Journal is co-owned by BMJ to the co-owners of the Journal, to publish the Work in this journal and any other BMJ products and to exploit all rights, as set out in our [licence](#).

The Submitting Author accepts and understands that any supply made under these terms is made by BMJ to the Submitting Author unless you are acting as an employee on behalf of your employer or a postgraduate student of an affiliated institution which is paying any applicable article publishing charge ("APC") for Open Access articles. Where the Submitting Author wishes to make the Work available on an Open Access basis (and intends to pay the relevant APC), the terms of reuse of such Open Access shall be governed by a Creative Commons licence – details of these licences and which [Creative Commons](#) licence will apply to this Work are set out in our licence referred to above.

Other than as permitted in any relevant BMJ Author's Self Archiving Policies, I confirm this Work has not been accepted for publication elsewhere, is not being considered for publication elsewhere and does not duplicate material already published. I confirm all authors consent to publication of this Work and authorise the granting of this licence.



1  
2  
3  
4  
5  
6  
7  
8  
9  
10  
11  
12  
13  
14  
15  
16  
17  
18  
19  
20  
21  
22  
23  
24  
25  
26  
27  
28  
29  
30  
31  
32  
33  
34  
35  
36  
37  
38  
39  
40  
41  
42  
43  
44  
45  
46  
47  
48  
49  
50  
51  
52  
53  
54  
55  
56  
57  
58  
59  
60

1 **Effectiveness of Breathing Exercises, Foot Reflexology and Back Massage (BRM) on**  
2 **Labour Pain, Anxiety, Duration, Satisfaction, Stress Hormones and New-born**  
3 **Outcomes among Primigravidae during the First Stage of Labour in Saudi Arabia:**  
4 **A Study Protocol for a Randomised Controlled Trial**

5 **Kamilya Baljon<sup>1,2</sup>, Muhammad Hibatullah Romli<sup>3</sup>, Adibah Hanim Ismail@Daud<sup>1</sup>,**  
6 **Lee Khuan<sup>3</sup>, Boon-How Chew<sup>1\*</sup>**

7 <sup>1</sup> *Department of Family Medicine, Faculty of Medicine and Health Sciences, Universiti*  
8 *Putra Malaysia, 43400 Serdang, Selangor, Malaysia*

9 <sup>2</sup> *Nursing College, Umm, Al-Qura University, Makkah, Saudi Arabia*

10 <sup>3</sup> *Department of Nursing and Rehabilitation, Faculty of Medicine and Health Sciences,*  
11 *Universiti Putra Malaysia, 43400 Serdang, Selangor, Malaysia*

12 Corresponding author: Boon-How Chew, Department of Family Medicine, Faculty of  
13 Medicine and Health Sciences, Universiti Putra Malaysia, 43400 Serdang, Selangor,  
14 Malaysia. Tel: +603-89472520. Fax: +603-89472328. Email:  
15 [chewboonhow@upm.edu.my](mailto:chewboonhow@upm.edu.my); [chewboonhow@gmail.com](mailto:chewboonhow@gmail.com)

## 1 ABSTRACT

2 **Introduction** Labour pain is among the severest pains primigravidae may experience  
3 during pregnancy. Failure to address labour pain and anxiety may lead to abnormal labour.  
4 Despite the many complementary non-pharmacological approaches to coping with labour  
5 pain, the quality of evidence is low and best approaches are not established. This study  
6 protocol describes a proposed investigation of the effects of a combination of breathing  
7 exercises, foot reflexology and back massage (BRM) on the labour experiences of  
8 primigravidae.

9 **Methods and analysis** This randomised controlled trial will involve an intervention group  
10 receiving BRM and standard labour care, and a control group receiving only standard  
11 labour care. Primigravidae of 26–34 weeks of gestation without chronic diseases or  
12 pregnancy-related complications will be recruited from antenatal clinics. Eligible and  
13 consenting patients will be randomly allocated to the intervention or the control group  
14 stratified by intramuscular pethidine (IMP) use. The BRM intervention will be delivered  
15 by a trained massage therapist. The primary outcomes of labour pain and anxiety will be  
16 measured during and after uterine contractions at baseline (cervical dilatation 6 cm) and  
17 post-BRM hourly for two hours. The secondary outcomes include maternal stress hormone  
18 (adrenocorticotrophic hormone, cortisol and oxytocin) levels, maternal vital signs (V/S),  
19 foetal heart rate (FHR), labour duration, Apgar scores, and maternal satisfaction. The  
20 sample size is estimated based on the between-group difference of 0.6 in anxiety scores,  
21 95% power and 5%  $\alpha$  error, which yields a required sample size of 154 (77 in each group)  
22 accounting for a 20% attrition rate. The between- and within-group outcome measures will

1 be examined with mixed-effects regression models, time series analyses and paired t-test  
2 or equivalent non-parametric tests, respectively.

3 **Ethics and dissemination** Ethical approval was obtained from the Ethical Committee for  
4 Research Involving Human Subjects of the Ministry of Health in the Saudi Arabia (H-02-  
5 K-076-0319-109) on 14 April 2019, and from the Ethics Committee for Research Involving  
6 Human Subjects (JKEUPM) Universiti Putra Malaysia on 23 October 2019, reference  
7 number: JKEUPM-2019-169. Written informed consent will be obtained from all  
8 participants. Results from this trial will be presented at regional, national and international  
9 conferences and published in indexed journals.

10 **Trial registration number and date** ISRCTN87414969, registered 3 May 2019

11 **Keywords** Breathing exercises, Reflexology, Massage, Primigravidae, Labour pain, Stress  
12 hormones.

## 1 Article Summary

### 2 Strengths and Limitations of the Study

- 3 • This single-blind, parallel, randomised controlled trial will explore the combined  
4 effects of breathing exercises, foot reflexology and back massage (BRM) on pain  
5 and anxiety during labour in healthy primigravidae with a singleton foetus.
- 6 • The effects of BRM will also be examined through objective physiological  
7 measurement of stress hormone levels and comparison of these levels between  
8 groups before and after the intervention.
- 9 • The intervention will be applied for one hour and only once during the first stage  
10 of labour after cervical dilatation of 6 centimetres.
- 11 • Blinding of the primigravidae mothers is not possible, and there may be bias in the  
12 self-assessed subjective outcomes such as the Visual Analog Scale.
- 13 • The expertise and experience of the nursing graduates who are trained to be the  
14 massage therapists is considered an important factor in the quality of treatment  
15 provided and this may underestimate the effect of BRM.

16 **Word count 4,917 words**

## 1 INTRODUCTION

2 Many primigravidae have reported experiencing various levels of pain during labour and  
3 high levels of anxiety about the labour process and its outcomes.<sup>1-3</sup> Anxiety escalating to  
4 fear is a common issue related to labour, especially among primigravidae.<sup>4,5</sup> Other recorded  
5 negative perceptions and psychological effects influencing labour experiences include  
6 distress and feelings of powerlessness during labour for women and their families.<sup>5-7</sup>

7 When poorly managed, labour pain may lead to severe consequences for women, such as  
8 prolonged labour,<sup>5,8</sup> which may increase the risk of foetal distress, head compression,  
9 intrauterine foetal death, low Apgar scores and physical injuries to neonates.<sup>5,9</sup> Prolonged  
10 labour results in increased risk of caesarean section, induced labour and assisted delivery  
11 using vacuum and forceps.<sup>10,11</sup> Studies have also reported negative mental impacts on  
12 women, sometimes even including postnatal post-traumatic stress disorder,<sup>12,13</sup> and  
13 subsequently reduced quality of life.<sup>14</sup> Feelings of anxiety often originate from possible  
14 birthing complications about which pregnant women have heard and read,<sup>4,5,15,16</sup> and may  
15 even result in women refusing normal vaginal delivery and insisting on caesarean sections  
16 without medical indications.<sup>17</sup> It is therefore important for healthcare professionals to assist  
17 and educate all expectant mothers on labour pain management.

18 Appropriate labour pain management and interventions are important aspects of obstetric  
19 care to ensure optimum outcomes for mothers and babies.<sup>18</sup> Pharmacologic interventions  
20 used in the management of labour pain include systemic sedatives, analgesics and regional  
21 anaesthesia.<sup>19</sup> Examples of these analgesics are aerosol and epidural opioids, intramuscular

1 pethidine (IMP) and intravenous sedatives.<sup>20,21</sup> Some of these are expensive and may be  
2 associated with adverse effects on mothers, the labour process and neonates.<sup>22</sup> In contrast,  
3 most non-pharmacological methods for labour pain management are simple and non-  
4 invasive, and are often cheaper and safer than pharmacological interventions.<sup>23–25</sup> Studies  
5 have found that non-pharmacological approaches, particularly breathing exercises, have  
6 positive impacts on relief of labour pain,<sup>26–28</sup> and anxiety in pregnant mothers.<sup>29–31</sup> This is  
7 especially true for Lamaze breathing, deep breathing exercises,<sup>26–28,32,33</sup> reflexology,<sup>6,34</sup>  
8 and massage.<sup>35</sup> Non-pharmacological approaches have been linked to shorter labour  
9 duration,<sup>36</sup> and improved new-born outcomes.<sup>37</sup> Our systematic review found that massage  
10 is beneficial for relieving labour pain,<sup>38</sup> and is associated with greater relaxation, higher  
11 alertness levels, improved mood and reduced stress hormone (cortisol) levels and anxiety  
12 symptoms.<sup>39</sup>

### 13 **Rationale**

14 It is hypothesised that the non-pharmacological approach of labour pain management  
15 occurs via the alteration of nociceptive stimuli and modification of the processing of  
16 nociceptive input at the central level, resulting in an overall improved sense of comfort and  
17 well-being, ultimately leading to stronger coping capabilities by the mothers in labour.<sup>40</sup>

18 The physiological mechanism of breathing is a protective action as it is a fight-or-flight  
19 reflex triggered by the central nervous system. Physiologically, deep abdominal breathing  
20 stimulates the parasympathetic nervous system. As a result, the blood circulation in  
21 pregnant women will undergo oxygenation, which will trigger the release of endorphins  
22 associated with decrease in heart rate and increase in feelings of calmness. At the same

1 time, endorphins can also suppress the sympathetic system, leading to a decrease in the  
2 release of stress hormones such as cortisol.<sup>41, 42</sup>

3 As for reflexology, so far there has been no constructive explanation of the underlying  
4 mechanism in reducing labour pain.<sup>6,36</sup> The reflexology therapist will apply pressure three  
5 times on specific points of the feet that are energetically connected to certain parts and  
6 organs of the body. As with skin-to-skin contact during massage, reflexology point  
7 pressure could trigger the release of endogenous endorphins and encephalins that help to  
8 reduce labour pain, stress, fatigue and anxiety.<sup>43-46</sup> Pressure on the solar plexus at the  
9 border of the upper and middle one-third of the sole is believed to facilitate the functions  
10 of the body's nervous system.<sup>47</sup> Pressure on the lower part of the forefoot reflects the heart  
11 and lungs. While pressure on the bridge of the foot reflects the liver and kidney and the  
12 heel will reflect the lower back, legs, pelvic region uterus, and intestines. The uterine point  
13 is believed to be located in the indented region between the inner ankles and the sole.<sup>48</sup>  
14 Therefore, it is believed to be helpful during labour. The pressure on toe and heel stimulate  
15 the reflex points in the pelvis. It is effective by releasing the oxytocin hormone which start  
16 and regulate the uterine contractions and relax during contractions.<sup>49</sup>

17 However, there are several postulated theories for its mechanism of action. Firstly, the  
18 autonomic-somatic integration theory suggests that the pressure applied to the feet during  
19 reflexology compresses the receptors in the cells, thus opening up the ionic channels in the  
20 plasma membrane and triggering a local action with the potential to convey messages to  
21 the spinal cord and/or brain.<sup>46</sup> The application of alternating pressure to the feet may also  
22 produce predictable reflexive actions within the nervous system and activate the

1  
2  
3 1 parasympathetic nervous system.<sup>50</sup> Based on the energy theory that moves toward the head  
4  
5 2 from reflex points that stimulate the energy, neural paths, improve blood flow, release the  
6  
7 3 endorphins and relief pain.<sup>51</sup> Another contemporary method explains that reflexology acts  
8  
9 4 through “sympathetic resonance,” in which an energy wave flows between therapist and  
10  
11 5 client, promoting homeostatic balance.<sup>52</sup> This may occur through local enzymatic reactions  
12  
13 6 on receptive fields or through an improved blood supply as a result of local skin  
14  
15 7 temperature changes following the skin-to-skin contact.<sup>47</sup> Reflexologists also believe that  
16  
17 8 the application of deep pressure on certain reflex points of the sole and palm may break  
18  
19 9 any calcium crystals and uric acid accumulated in nerve endings that may cause blockages  
20  
21 10 and induce pain.<sup>53</sup>

22  
23  
24  
25  
26  
27  
28 11 Reflexology also results in body relaxation and stimulation of any blocked nerve endings,  
29  
30 12 which may propel any sluggish glands or organs to regain their normal functioning.<sup>54</sup>  
31  
32 13 Ambiguity remains regarding the theories and mechanism of action of foot reflexology for  
33  
34 14 labour pain, as compared to that for general pain.<sup>6,35,36</sup> Nonetheless, it is plausible to believe  
35  
36 15 that reflexology techniques would have similar physiological effects for labour pain that  
37  
38 16 bring about a sense of wellbeing, analgesia and subsequently the perception of pain relief.<sup>37</sup>  
39  
40 17 Figure 1 summarizes the possible mechanisms of Reflexology therapy.

41  
42  
43  
44  
45  
46 18 Massage therapy is another type of commonly used Complementary and Alternative  
47  
48 19 Medicine (CAM) for the promotion of health and wellbeing.<sup>35</sup> Massage is a potent  
49  
50 20 mechanical stimulus that produces a short-lived analgesic effect by activating the ‘pain  
51  
52 21 gate’ mechanism.<sup>55</sup> Longer-lasting pain control appears to be mediated mainly by the  
53  
54 22 descending pain suppression mechanism by activation of descending efferent pathways.<sup>56</sup>  
55  
56



1 The inhibition of pain-transmission neurons involves a combination of physiological and  
2 neurological mechanisms and it is commonly activated by noxious stimulation.<sup>57</sup> Figure 2  
3 summarizes the possible mechanisms action of massage therapy.<sup>58</sup>

4 The three aforementioned therapies (i.e. BRM) for labour pain management have been  
5 shown to influence the secretion of certain stress hormones such as cortisol,  
6 adrenocorticotrophic hormone (ACTH),<sup>39,59</sup> oxytocin (OT),<sup>59</sup> and possibly also the  
7 endorphins.<sup>44,45</sup> Endogenous oxytocin is a key component in the molecular pathways that  
8 buffer reaction to stress and decrease sensitivity to pain and inflammation,<sup>60</sup> cortisol is an  
9 important hormone released during stressful conditions.<sup>39</sup>

#### 10 **Significance of this clinical trial**

11 Many studies have reported that not all pharmacologic and non-pharmacologic methods on  
12 their own are able to reduce labour pain satisfactorily. Despite the intervention, some  
13 mothers still endure some pain, anxiety and prolonged labour, and suffer from negative  
14 maternal and perinatal consequences.<sup>5,15,16</sup> From the perspective of complementary  
15 management, BRM are the techniques with the highest potential for managing pain and  
16 anxiety for primigravidae. Systematic reviews have concluded that CAM interventions to  
17 manage pain and anxiety during labour have often been biased and/or poorly executed, thus  
18 resulting in low quality of evidence,<sup>61-64</sup> or no strongly supported evidence.<sup>65-67</sup> Therefore,  
19 there is a need for a rigorous and robust trial to examine the effect of the combined  
20 intervention of BRM on labour pain, anxiety, stress hormones, V/S, FHR, duration of

1 labour, Apgar Scores and maternal satisfaction among the primigravidae using multiple  
2 relevant outcome measures.

### 3 **METHODS AND DESIGN**

4 This study aims to investigate the combined effect of BRM on labour pain, duration of  
5 labour, anxiety, maternal satisfaction, stress hormones, and new-born outcome among  
6 primigravidae in Saudi Arabia. The specific objectives are 1) to compare the effect of the  
7 combined breathing exercise, foot reflexology, and back massage (intervention) on labour  
8 pain intensity, anxiety level, duration of labour, maternal satisfaction, stress hormones, and  
9 neonatal outcome compared to the standard midwifery care (control); 2) to identify the  
10 predictors of pain, anxiety, duration of labour, the satisfaction of mother, and neonatal  
11 outcome from the baseline sociodemographic and obstetric characteristics.

#### 12 **Study Design**

13 The study design will be a single-blind parallel randomised controlled trial (RCT), in which  
14 participants are randomly assigned to receive either the BRM intervention or control care.

#### 15 **Study Setting**

16 This study will be conducted in the Makkah Maternity and Children Hospital (MCH) in  
17 Makkah, Saudi Arabia. The hospital is a tertiary-level, governmental referral hospital with  
18 special services for paediatrics, gynaecology, and obstetrics.<sup>68</sup> In Saudi Arabia, almost all  
19 tertiary hospitals, including our study site, offer systemic pharmacologic agents, either  
20 intravenous or intramuscular analgesics to manage pain during labour;<sup>69</sup> however,  
21 providing non-invasive and non-pharmacological methods of pain relief during labour are

1 not common practices.<sup>69</sup> To our best knowledge, the combined effect of BRM on  
2 primigravidae has not been investigated at any Saudi Arabia hospital prior to this trial.

### 3 **Participants**

4 The study participants will include primigravidae, age 20–35 years old, at 37 to 41 weeks  
5 of gestation, and in the first stage of labour. The inclusion criteria include singleton  
6 pregnancy, cephalic presentation, and regular contraction. In labour, the participants must  
7 achieve six centimetres of cervical dilatation, with a minimum of three contractions of at  
8 least moderate intensity every 10 minutes, in which the duration of the contraction must be  
9 between 30–60 seconds.

10 The exclusion criteria include diagnosis of underlying chronic diseases such as  
11 cardiovascular disease, kidney disease, diabetes, asthma, mental health disorders, epilepsy  
12 or seizure; pregnancy-related diseases such as gestational diabetes, preeclampsia, cephalo-  
13 pelvic disproportion, polyhydramnios or oligohydramnios or deep venous thrombosis; and  
14 pregnancy complications such as placenta praevia, antepartum haemorrhage, fetal distress  
15 or being put on analgesics other than IMP.

### 16 **Recruitment**

17 Recruitment will be conducted at the antenatal clinic at the trial site. Only those who plan  
18 to deliver in the trial hospital's delivery room will be further briefed and assessed for their  
19 eligibility. At this hospital, antenatal mothers are given monthly follow-up appointments

1 until 28 weeks' gestation. The frequency increases to bi-weekly until 32 weeks' gestation;  
2 then patients are seen weekly until delivery.

3 For this study, we will approach primigravidae between 26 to 34 weeks of gestation in  
4 equal numbers based on the gestational weeks. This means that about an equal number of  
5 primigravidae at week of gestation of 26, 28, 30, 32 and 34 will be recruited in order to  
6 spread out the occurrence of labour in the subsequent 2–3 months to increase the feasibility  
7 of the BRM intervention. Because participant recruitment and the training of the research  
8 team members is estimated to last up to two to three months, women of 34+ weeks gestation  
9 cannot be recruited during this period because they will inevitably go into labour before  
10 the research preparations are complete.

11 At the antenatal clinic, the principal investigator will provide general health education  
12 about pain management during labour. The participant information sheet of this RCT will  
13 be provided for the eligible patients. If they are interested in participating, they will sign a  
14 written consent form and will be identified by a unique stamp on their antenatal cards.  
15 When the participants arrive in the labour room for delivery, they will be re-evaluated for  
16 the eligibility.

## 17 **Randomisation**

18 Since IMP is a commonly prescribed analgesic in labour and may have substantial effects  
19 on the primigravidae and neonates, randomisation will be stratified according to the  
20 administrative status of IMP. This will ensure the same numbers of primigravidae with and

1 without IMP in the intervention and control groups. To achieve this, we use a block of size  
2 4 with a 1:1 allocation ratio, leading to a possibility of 6 permutations. All possible block  
3 sequences will be randomly generated with the help of free software from the internet  
4 <https://www.sealedenvelope.com/simple-randomiser/v1/>. A random list will be created  
5 after the sample size number, treatment groups, block sizes, list length, and stratification  
6 factors are entered into the software. The order of the subjects will be used by the research  
7 coordinator who will be stationed in the delivery room to conduct the random group  
8 allocation for primigravidae in labour who have achieved a cervical dilation of 6 cm. The  
9 principal investigator, outcome assessors, and massage therapist in this trial will not be  
10 involved in the allocation of the interventional groups. Figure 3 outlines the CONSORT  
11 flow diagram.

## 12 **Data Collection**

13 Every questionnaire will be coded with a unique number. Data collection in the delivery  
14 room will be facilitated by the trained research coordinator and two outcome assessors.  
15 The outcome assessors will be assigned to the control or the intervention group on the same  
16 day. Once the form is completed by the outcome assessors, it will be kept by the research  
17 coordinator in a safe location in the delivery room.

18 Throughout all of the outcome assessment time points, a massage therapist will be present  
19 in the delivery room of both the intervention and control groups. For the intervention group,  
20 the primigravidae in labour will receive the BRM intervention from the massage therapist.  
21 For the control group, the practicing midwife will perform routine labour care such as touch  
22 therapy, ensuring that the mother lies on her left side, and providing encouragement and

1  
2  
3 1 counselling. The outcome assessor will measure and assess both the intervention and  
4  
5 2 control groups at the same time points. Both groups will be equipped with similar extra  
6  
7 3 equipment. This blinding effort is intended to minimize biases during the outcome  
8  
9 4 assessment. However, blinding of the participants will be impossible due to the nature of  
10  
11 5 the intervention.  
12  
13

## 14 15 16 6 **Interventions**

17  
18  
19 7 The BRM intervention consists of 5 minutes of breathing exercise followed by 10 minutes  
20  
21 8 of foot reflexology on each sole and 35 minutes of continuous massage over the lower  
22  
23 9 limbs and back. The massage therapist will allow the primigravidae to lie on the left side,<sup>70</sup>  
24  
25 10 to move and change her position during the intervention and answer any question or  
26  
27 11 inquiry. Table 1 provides a detailed explanation of the BRM intervention procedure. As  
28  
29 12 for the control group, the primigravidae in labour will receive routine labour room care.  
30  
31  
32  
33  
34

## 35 13 **Training for the research team members**

36  
37  
38  
39 14 A total of 13 research assistants will be recruited and trained for the intervention and data  
40  
41 15 collection from June to December 2019, (Figure 4). They will be given the BRM training  
42  
43 16 for one week by the principal investigator who has completed the professional massage  
44  
45 17 and reflexology training at a certified training centre in Malaysia (Tim Body Care Training  
46  
47 18 Centre 1403695-D) for six months including training and working.  
48  
49  
50  
51  
52  
53  
54  
55  
56  
57  
58  
59  
60

## 1 Study Outcomes and Measures

2 There are eight outcomes: two primary outcomes and six secondary outcomes. The two  
3 primary outcomes are pain intensity and anxiety level (See Table 2). Pain intensity is  
4 measured with the Present Behavioural Intensity (PBI)<sup>71,72</sup> and the self-report Visual  
5 Analog Scale (VAS),<sup>73-77</sup> while anxiety is measure with Anxiety Assessment Scale for  
6 Pregnant Women in Labour (AASPWL).<sup>78</sup>

7 The outcome assessor will ask the pregnant women to pick a colour on an A-4 sized paper  
8 that contains six different coloured parts, from no pain (score 1) to most severe pain (score  
9 6) based on her level of pain.<sup>76,79</sup> The researcher selected the VAS questionnaire because  
10 it is an acceptable tool and relatively easy to administer to women in labour. Pain intensity  
11 will be measured at baseline before the intervention, and multiple times during and after  
12 contractions (Figure 5a). During the intervention, pain intensity will be measured after the  
13 breathing exercise and foot reflexology therapy (after 25 minutes from the start of the  
14 intervention), followed by another assessment halfway through the massage therapy (after  
15 45 minutes) during and after contraction. Pain intensity will be measured for every  
16 participating primigravidae in both the intervention and control group. For the control  
17 group, pain intensity will be measured first at baseline before the intervention at 6 cm.  
18 During the intervention, pain intensity will be measured after 25 minutes from the start of  
19 the intervention time, followed by another assessment after 45 minutes, during and after  
20 contraction. Upon completion of the intervention, the measurement will be taken  
21 immediately, and twice hourly thereafter during the first stage of labour (Figure 5b).

1 The AASPWL will be used to assess anxiety during labour. The anxiety level will be  
2 measured at cervical dilatation of 6cm, after the completion of the interventions, and twice  
3 every 60 minutes during the first stage of labour. For the control group, the assessment will  
4 be performed when the cervix is at 6 cm, after one hour (synchronized to the completion  
5 of the intervention in the intervention group), and twice every 60 minutes during the first  
6 stage of labour (Figure 5b).

7 The secondary outcomes measured in the RCT include maternal stress hormones level,  
8 maternal V/S, FHR, duration of labour, neonatal Apgar score, and maternal satisfaction<sup>80</sup>  
9 (See Table 3).

10 The stress hormones level will be measured at baseline, and again one and a half hour after  
11 the patient has reached 6 cm of cervical dilatation (Figure 5). Blood samples will again be  
12 taken by midwives on duty in the delivery room. This will occur after the BRM intervention  
13 in the intervention group (Figure 5a), and at the same time in the control group (Figure 5b).

14 The research assessors will collect an 8 ml blood sample in a plain tube, of which 3mls is  
15 for ACTH, 3mls for cortisol, and 2mls for OT hormones; it will be sent immediately to the  
16 MCH laboratory to carefully avoid any haemolysis of the samples. Hormones will be  
17 analysed by the sandwich ELISA technique using commercial kits by Cobas e411 Analyzer  
18 (HITACHI, USA) for ACTH hormone, and Abbot Architect I200 Analyzer (Abbott, USA)  
19 for Cortisol and OT hormones.

20 Since cortisol levels follow a diurnal variation or circadian rhythm where the hormone  
21 levels peak in the morning and fall at night, and vary in accordance with a number of factors



1  
2  
3  
4  
5  
6  
7  
8  
9  
10  
11  
12  
13  
14  
15  
16  
17  
18  
19  
20  
21  
22  
23  
24  
25  
26  
27  
28  
29  
30  
31  
32  
33  
34  
35  
36  
37  
38  
39  
40  
41  
42  
43  
44  
45  
46  
47  
48  
49  
50  
51  
52  
53  
54  
55  
56  
57  
58  
59  
60

1 including age, time of day, stress level, sample type, laboratory location and the method  
2 used for testing,<sup>81,82</sup> we will use a chart from the laboratory to verify the normal cortisol  
3 range in the morning, noon, afternoon, evening, or night, and compare these ranges to the  
4 blood samples taken to determine whether the blood test results of the participants before  
5 and after the intervention are high, normal or low.

6 ACTH and cortisol levels are interrelated. When the cortisol levels are at their peak, ACTH  
7 levels generally fall and vice versa.<sup>83</sup> Hence, it may be understood that ACTH and cortisol  
8 have corresponding levels at any given point of time. This provides a relative value for  
9 both stress hormones. With regard to OT, the blood sample test for the pregnant woman  
10 will be higher if she receives an infusion of OT during intervention.<sup>84,85</sup> If the events are  
11 equal in both groups, we will proceed to the analysis as planned. If the events are many  
12 and unequal in both groups, we will either conduct a separate statistical analysis stratified  
13 according to the event of OT infusion. If the number of event occurrences is low, we may  
14 exclude these participants and analyse the outcome as planned. However, the author will  
15 investigate the oxytocin level before and after applying the BRM in addition to childbirth.  
16 Oxytocin increases with contraction and hypothetically with and after BRM. The oxytocin  
17 will increase in the second stage, inhibit the Stress hormones, and will increase after apply  
18 the BRM.

19 Maternal V/S and FHR will be collected twice at 6cm cervical dilatation and immediately  
20 post-BRM for the intervention group, and the same data will be collected at the same timing  
21 for the control groups. The Apgar Scores (taken from the delivery room medical record)

1 and maternal satisfaction will be measured only once at the completion of the childbirth,  
2 before the transfer of the mother from the delivery room to the postnatal ward.

### 3 **Sample size**

4 The sample size estimation was based on a review of similar literature on pain and anxiety  
5 as outcomes, and calculated using G\*power free software.<sup>86</sup> We estimated an effect size of  
6 0.6 on anxiety mean score reduction in the intervention group compared to the control,<sup>86</sup>  
7 as this gives a larger required sample size compared to that based on the primary outcome  
8 of pain. Thus, with the power of 95% at  $\alpha$  error 0.05, the required sample size is 128 for  
9 the two groups. It is further inflated to 154 to account for a predicted 20% attrition rate.  
10 Therefore, a minimum number of 77 primigravidae will be recruited for each group.

### 11 **Statistical analysis**

12 Data will be entered by a blinded enumerator. The database will be checked for accuracy  
13 before analysis. The principal investigator has the overall responsibility for the  
14 compilation, maintenance, and management of the study database. The analysis will be  
15 performed using IBM Statistical Package for Social Science (SPSS) version 25.

16 Descriptive statistical analysis will be performed according to the distribution of the data,  
17 using means and standard deviations for data with normal distribution, and median and  
18 inter-quartile ranges for data that are not normally distributed. Normality testing will be  
19 conducted for all continuous variables using different methods such as Histogram and p-p  
20 plot. Categorical variables will be reported in frequencies and percentages.

1  
2  
3 1 The differences between the groups and times level will be analysed using a Generalised  
4  
5 2 Linear Mixed Model (GLMM). GLMM is appropriate where repeated measurements are  
6  
7 3 made on the same statistical units. GLMM will also be used to accommodate non-normal  
8  
9 4 distribution in outcome data. The variables of time in a categorical form, intervention  
10  
11 5 group, group\*time interaction, and the baseline random part of the model will include a  
12  
13 6 random intercept and an unstructured correlation matrix for the correlation of  
14  
15 7 measurements within pregnant women. The fixed part of the model will include pain score,  
16  
17 8 whereby the difference in pain score at every time point will be tested using a linear  
18  
19 9 contrast. We will take the pain intensity measured with PBI and VAS at one-hour post  
20  
21 10 intervention as the main co-primary outcomes. This is because the effects of the massage  
22  
23 11 and reflexology will still be observable, and thus the intervention group can be fairly  
24  
25 12 compared to the control group.<sup>46,50-53</sup>

26  
27  
28  
29  
30  
31  
32  
33 13 Any significant baseline imbalances will be adjusted for in the analysis. If necessary,  
34  
35 14 multiple imputations will be conducted for the missing data. A calculated 95% confidence  
36  
37 15 interval and two-sided  $\alpha$  of 0.05 will be used to test significance. In addition, we will  
38  
39 16 analyse PBI and VAS at the same time points and measure the agreement between PBI and  
40  
41 17 VAS by using the Spearman correlation coefficient and interclass correlation. We will  
42  
43 18 analyse other outcomes using the same statistical strategy mentioned above. Additionally,  
44  
45 19 we will conduct time series analyses to examine the patterns of change in the outcomes  
46  
47 20 between the two groups and after BRM intervention.  
48  
49  
50  
51  
52  
53  
54  
55  
56  
57  
58  
59  
60

1  
2  
3 1 The independent effect(s) of socio-demographic and obstetric characteristics on each  
4  
5 2 primary and secondary outcome at one-hour post-intervention will be analysed using  
6  
7 3 multiple linear regression analyses.  
8  
9

#### 10 11 12 4 **DISCUSSION** 13 14

15 5 Safe and efficient pain management is important for pregnant women and their families,<sup>18</sup>  
16  
17 6 and different types of CAM have been shown to be beneficial to reduce or alleviate labour  
18  
19 7 pain. However, evidence is scarce regarding the effects of combined therapies.<sup>87</sup> Therefore,  
20  
21 8 we designed this trial to study the effects of BRM on labour pain and other psychological  
22  
23 9 and physiological impacts among primigravidae. The study protocol for the RCT is to  
24  
25 10 determine the combined effect of BRM on the intensity of pain and level of anxiety in  
26  
27 11 primigravidae during the first stage of labour. Additional outcomes that will be assessed  
28  
29 12 include stress hormones, maternal VS, FHR, duration labour, neonatal Apgar score, and  
30  
31 13 maternal satisfaction.  
32  
33  
34  
35

36  
37  
38 14 In this study, the intervention will be applied only once and only during the first stage of  
39  
40 15 labour even though the first stage of labour among primigravidae takes approximately 8–  
41  
42 16 12 hours. By timing the intervention after cervical dilation of 6 cm, the effect of the  
43  
44 17 combined BRM could exert its greatest influences (if any) on the labour experience of the  
45  
46 18 primigravidae and neonatal outcome, because this period is believed to accompany the  
47  
48 19 highest levels of labour pain.<sup>88,89</sup>  
49  
50  
51  
52  
53  
54  
55  
56  
57  
58  
59  
60

1 We will assess the outcomes using a mixture of subjective and objective tools. For  
2 example, pain intensity and anxiety levels are subjective measurements, based on the  
3 personal feelings and judgments of the respondents. Duration of labour, neonatal Apgar  
4 score, and maternal stress hormones level of ACTH, cortisol, and oxytocin are objective  
5 measurements that will indicate the stress response to the BRM intervention conducted on  
6 the primigravidae. This is one of the strengths of our study.

7 VAS is one of several ways of measuring the effectiveness of BRM, and is a commonly  
8 used graphic rating method.<sup>70,78</sup> However, VAS might not be the gold standard to measure  
9 labour pain, given the inconsistency of its results and its ceiling effect.<sup>78,90</sup> Recognizing  
10 this inadequacy, we will ensure that the participants understand the VAS scoring at  
11 admission to the delivery room before they are asked to indicate their pain level later.  
12 Labour pain outcome will also be measured via pain intensity assessment using the PBI,<sup>74</sup>  
13 which will be rated by outcome assessors. Multiple measurements will be taken during and  
14 after contraction, and before and after the intervention. There will also be other outcomes,  
15 related to maternal response to pain, namely anxiety level and maternal stress hormones.<sup>91</sup>

16 This study has several other limitations. First, the intervention will be performed for one  
17 hour, during which it may be interrupted by routine medical care such as regular vaginal  
18 examinations, V/S measurements, and FHR monitoring. However, we believe that this will  
19 not reduce the effect of the BRM intervention, because we can start the BRM before or  
20 after the labour care routine. Second, the process of labour and birthing is unpredictable  
21 even if the participants are low-risk. In certain instances, the process of the intervention  
22 might not go well as planned and this may reduce the sample size. Some patients may end

1 up needing a caesarean section, and some may suffer from other obstetric complications  
2 during delivery. As a result, we have inflated the sample size accordingly. Third, the results  
3 from this study will not be generalisable to multigravidae as we include only primigravidae.  
4 Nevertheless, we believe that primigravidae will benefit the most from the intervention as  
5 they are likely to experience a higher level of labour pain and a longer duration of labour  
6 compared to multigravidae. Fourth, placebo effects can influence patient outcomes after  
7 (CAM), resulting in high rates of good outcomes, which may be wrongly attributed to  
8 specific treatment effects.<sup>92</sup>

9 We recognise that the expertise and experience level of the reflexologist is an important  
10 factor in the quality of treatment provided and this may affect the outcomes of the BRM.

11 The massage therapists and the outcome assessors will be given the appropriate training  
12 on the BRM for one week by the principal investigator who attended a professional training  
13 and was certified. After the training, they will be tested in a pilot study to ensure their  
14 competency in performing the BRM. Additional quality control measures for the outcome  
15 assessors are planned, as they will be assigned to the control delivery room or the  
16 intervention delivery room on the same day. All of the completed assessment forms will  
17 be reviewed and kept by the research coordinator in a safe location in the delivery room.

18 Any issues on the form such as blank spaces and extreme values will be immediately  
19 clarified and resolved.

20 In addition to labour pain, this study will assess the anxiety level of pregnant mothers.

21 Unlike labour pain, anxiety level can be affected by individual characteristics, previous life

1 experiences, and other environmental causes.<sup>93</sup> However, we believe that these factors will  
2 not play a significant role after effective randomisation.

3 Apart from the actual labour experience, there are a few other external factors that may  
4 affect maternal satisfaction, such as the delivery room services, the health of the baby, the  
5 gender of the child, family support, and other psychosocial factors. As satisfaction is a  
6 multi-dimensional and complex feeling, it is difficult to measure with a single tool and to  
7 narrow it down to only the first stage of labour.

8 It is understood that a birthing process is a natural event, especially for low-risk women.  
9 Thus, the management of labour should be conducted in a supportive manner with minimal  
10 or no interferences. This study will provide high-quality evidence about the effects of the  
11 combined BRM for labour pain management. These findings will be important for hospitals  
12 offerings for expectant mothers in providing a rationale for their decisions about which  
13 alternative treatments to offer, to primigravidae and their family members during decision  
14 making about labour pain management.

### 15 **Acknowledgements**

16 The authors would like to acknowledge the assistance provided by Um-Al-Qura  
17 University, the Research Department in the Directorate of Health Affairs, Makkah Region,  
18 and Saudi Arabia Culture Mission in Saudi Arabia. Also, we would like to acknowledge  
19 Enago for the English language editing services for this report.

## 1 **Author Contributions**

2 KB drafted, formulated, and submitted the manuscript. All authors MHR, AHI, LK & BHC  
3 contributed to the study designs, read, revised, and approved the research protocol critically  
4 for important intellectual content and helped to draft the final manuscript. All authors  
5 approved the final manuscript for submission. Authorship eligibility is in accordance with  
6 the International Committee of Medical Journal Editors (ICMJE) guidelines.

## 7 **Funding**

8 This work was supported by the Umm Al-Qura University and Saudi Arabia Culture  
9 Mission (SACM). The author (KB) is a student who owns a Financial Guarantee, which  
10 covers the study and research process. The Financial Guarantee will cover all the research's  
11 payments. The funders will not be involved in the study design, data collection, analysis  
12 and interpretation of the data and writing of the manuscript.

## 13 **Competing Interest**

14 None declared.

## 15 **Patient Consent for Publication**

16 Not applicable since this is a study protocol.

## 17 **Availability of Data and Materials**

18 The datasets will be available from the corresponding author on reasonable request. The  
19 data will be kept for a maximum period of two years from the end of data analysis and will  
20 be placed in a sealed envelope that will remain with the primary author. Subsequently, the



1 forms will be destroyed via a shredding machine located at UPM in the presence of my  
2 supervisor and some academic staff. The soft copy and record data, as well as the  
3 questionnaires and database of hard copy will be deleted, and we will re-setup windows in  
4 the computer to destroy the database after a maximum period of two years.

### 5 **Ethics Approval and Consent to Participate**

6 Ethics approval was obtained from the Ethical Committee for Research Involving Human  
7 Subjects of the Ministry of Health in the Saudi Arabia (H-02-K-076-0319-109) on 14 April  
8 2019, and from the Ethics Committee for Research Involving Human Subjects (JKEUPM)  
9 Universiti Putra Malaysia on 23 October 2019, reference number (JKEUPM-2019-169).  
10 Additional administrative approval will be requested from the medical director of the  
11 Makkah Maternity and Children Hospital. The participant information sheet for the  
12 pregnant women will be also provided. If they are interested and eligible to participate,  
13 pregnant women will sign consent forms. Consent form contains purpose of this study,  
14 procedures involved in the research pre and post intervention. They will inform the  
15 potential benefits and risk of the intervention research. Participants will be given an  
16 affirmation of confidentiality and protection the data collection. The results won't be  
17 disseminated to the study participants, except If one of the participants would like to know  
18 her results, her mobile number will be taken and a message will be sent.

### 19 **Patient and Public Involvement**

20 Patients are involved in the questionnaire's face and content validity testing. Based on  
21 feedback from the patients in a pilot study, improvement to the questionnaires' approaches  
22 and trial processes will be implemented. Patient preferences were not directly obtained

1 with regard to choosing the BRM intervention; this was based on the principal  
2 investigator's practice experience and encounters with pregnant women. However, the  
3 patients will be involved in the recruitment to and conduct of the study. They will attend  
4 antenatal class and agreement by consent to share in this study. Also, they will answer all  
5 questionnaires pre and post the intervention. In addition, they will need to agree to BRM  
6 as the intervention.

For peer review only

## Reference

1. Gibson E. Women's expectations and experiences with labour pain in medical and midwifery models of birth in the United States. *Women and Birth* 2014;**27**:185–9. <https://doi.org/10.1016/j.wombi.2014.05.002>.
2. Beigi NMA, Broumandfar K, Bahadoran P, et al. Women's experience of pain during childbirth. *Iran J Nurs Midwifery Res* 2010;**15**:77–82.
3. Devilata T, Swarna S. Effectiveness of pre delivery preparation on anxiety among Primigravida mothers at maternal child health centre Tirupati, AP, India. *IOSR J Nurs Heal Sci* 2015;**4**:19-24. <https://doi.10.9790/1959-04651924>.
4. Aksoy M, Aksoy AN, Dostbil A, et al. The Relationship between Fear of Childbirth and Women ' s Knowledge about Painless Childbirth. *Obstet Gynecol Int* 2014;**2014**:7. <http://dx.doi.org/10.1155/2014/274303>
5. Nystedt A, Hildingsson I. Diverse definitions of prolonged labour and its consequences with sometimes subsequent inappropriate treatment. *BMC Pregnancy Childbirth* 2014;**14**:233. <https://doi.org/10.1186/1471-2393-14-233>
6. Hanjani SM, Tourzani ZM, Shoghi M. The Effect of Foot Reflexology on Anxiety , Pain , and Outcomes of the Labor in Primigravida Women. *Acta Med Iran* 2014;**53**:507–511.
7. Li W, Zhang H, Ling Y, et al. Effect of prolonged second stage of labor on maternal and neonatal outcomes. *Asian Pac J Trop Med* 2011;**4**:409–411. [https://doi.org/10.1016/S1995-7645\(11\)60114-4](https://doi.org/10.1016/S1995-7645(11)60114-4)
8. Neal JL, Lamp JM, Buck JS, et al. Outcomes of Nulliparous Women with Spontaneous Labor Onset Admitted to Hospitals in Pre-active versus Active Labor. *J Midwifery Womens Heal* 2014;**59**:28–34. doi:10.1111/jmwh.12160.Outcomes
9. Kjærgaard H, Olsen JØRN, Ottesen B, et al. Incidence and outcomes of dystocia in the active phase of labor in term nulliparous women with spontaneous labor onset. *Acta Obstet Gynecol* 2009;**88**:402-407. doi:10.1080/00016340902811001
10. Lowe NK. A Review of Factors Associated With Dystocia and Cesarean Section in Nulliparous Women. *J Midwifery Women's Heal* 2007;**52**:216–228. doi:10.1016/j.jmwh.2007.03.003
11. Shields SG, Ratcliffe SD, Fontaine P, et al. Dystocia in nulliparous women. *Am Fam Physician* 2007;**75**:1671–1678.
12. Garthus-Niegel S, Knoph C, von Soest T, et al. The Role of Labor Pain and Overall Birth Experience in the Development of Posttraumatic Stress Symptoms: A Longitudinal Cohort Study. *Birth* 2014;**41**:108–115. <https://doi.org/10.1111/birt.12093>

- 1  
2  
3 1 13. Peeler S, Stedmon J, Chung MC, et al. Women's experiences of living with postnatal  
4 2 PTSD. *Midwifery* 2018;**56**:70–78. <https://doi.org/10.1016/j.midw.2017.09.019>
- 6 3 14. Boryri T, Noori NM, Teimouri A, et al. The perception of primiparous mothers of  
7 4 comfortable resources in labor pain (a qualitative study). *Iran J Nurs Midwifery Res*  
8 5 2016;**21**:239–246. <https://doi.org/10.4103/1735-9066.180386>
- 10 6 15. Størksen HT, Garthus-niegel S, Adams SS, et al. Fear of childbirth and elective  
11 7 caesarean section : a population-based study. *BMC Pregnancy Childbirth* 2015;**15**:221.  
12 8 <https://doi.org/10.1186/s12884-015-0655-4>
- 14 9 16. Stoll KH, Hauck YL, Downe S, et al. Preference for cesarean section in young  
15 10 nulligravid women in eight OECD countries and implications for reproductive health  
16 11 education. *Reprod Health* 2017;**14**:116. <https://doi.org/10.1186/s12978-017-0354-x>
- 18 12 17. El-Aziz SNA, Mansour SE, Hassan NF. Factors associated with fear of childbirth: It's  
19 13 effect on women's preference for elective cesarean section. *J Nurs Educ Pract*  
20 14 2017;**7**:133–45. <https://doi.org/10.5430/jnep.v7n1p133>.
- 22 15 18. Lowe NK. The Pain and Discomfort of Labor and Birth. *J Obstet Gynecol Neonatal*  
23 16 *Nurs* 1996;**25**:82–92. <https://doi.org/10.1111/j.1552-6909.1996.tb02517.x>
- 25 17 19. Rayburn WF, Zuspan FP. *Drug therapy in obstetrics and gynecology*. 3rd ed. St. Louis:  
26 18 : Mosby 1992.
- 28 19 20. Ullman R, Smith LA, Burns E, et al. Parenteral opioids for maternal pain management  
29 20 in labour. *Cochrane Database Syst Rev* 2010;**9**.  
30 21 <https://doi.org/10.1002/14651858.CD007396.pub2>
- 32 22 21. Pereira RR, Kanhai H, Rosendaal F, et al. Parenteral Pethidine for labour pain relief  
33 23 and substance use disorder : 20-year follow-up cohort study in offspring. *BMJ Open*  
34 24 2012;**2**:e000719. <http://dx.doi.org/10.1136/bmjopen-2011-000719>
- 36 25 22. Smith LA, Burns E, Cuthbert A. Parenteral opioids for maternal pain management in  
37 26 labour. *Cochrane Database Syst Rev* 2018;**6**.  
38 27 <https://doi.org/10.1002/14651858.CD007396.pub3>
- 40 28 23. Simkin P. Reducing Pain and Enhancing Progress in labor : A Guide to  
41 29 Nonpharmacologic Methods for Maternity Caregivers. *Birth* 1995;**22**:161–71.  
42 30 <https://doi.org/10.1111/j.1523-536X.1995.tb00693.x>
- 44 31 24. Cook A, Wilcox G. Pressuring Pain: Alternative Therap for Labor Pain Management.  
45 32 *AWHONN Lifelines* 1997;**1**:36–41. <https://doi.org/10.1111/j.1552-6356.1997.tb00929.x>
- 47 33 25. Jones LV. Non-pharmacological approaches for pain relief during labour can improve  
48 34 maternal satisfaction with childbirth and reduce obstetric interventions. *Evid Based*  
49 35 *Nurs* 2015;**18**:70. <http://dx.doi.org/10.1136/eb-2014-101938>
- 51 36

- 1  
2  
3  
4  
5  
6  
7  
8  
9  
10  
11  
12  
13  
14  
15  
16  
17  
18  
19  
20  
21  
22  
23  
24  
25  
26  
27  
28  
29  
30  
31  
32  
33  
34  
35  
36  
37  
38  
39  
40  
41  
42  
43  
44  
45  
46  
47  
48  
49  
50  
51  
52  
53  
54  
55  
56  
57  
58  
59  
60
- 1 26. Busch V, Magerl W, Kern U, et al. The Effect of Deep and Slow Breathing on Pain  
2 Perception , Autonomic Activity , and Mood Processing -An Experimental Study. *Pain*  
3 *Med* 2012;**13**:215–28. <https://doi.org/10.1111/j.1526-4637.2011.01243.x>
  - 4 27. Thomas ME, Dhiwar MS. Effectiveness of Patterned Breathing Technique in  
5 Reduction of Pain During First Stage of Labour Among Primigravidas. *Sinhgad E-*  
6 *Journal Nurs* 2011;**1**:6–8.
  - 7 28. Kaur K, Rana AK, Gainer S. Effect of video on ‘ Breathing Exercises during labour ’  
8 on Pain Perception and Duration of Labour Among Primigravida Mothers. *Nurs*  
9 *Midwifery Res Journa* 2013;**9**:1–9.
  - 10 29. El-refaye GE, El Nahas EM, Ghareeb HO. Effect of kinesiio taping therapy combined  
11 with breathing exercises on childbirth duration and labor pain : a randomized controlled  
12 trial. *Bull Fac Phys Ther* 2016;**21**:23–31. <https://doi.org/10.4103/1110-6611.188026>
  - 13 30. Chuang LL, Lin LC, Cheng P, et al. Effects of a relaxation training programme on  
14 immediate and prolonged stress responses in women with preterm labour. *J Adv Nurs*  
15 2011;**68**:170–80. <https://doi.org/10.1111/j.1365-2648.2011.05765.x>
  - 16 31. Akbarzadeh M, Sharif F, Zare N. The Reduction of Anxiety and Improved Maternal  
17 Attachment to Fetuses and Neonates by Relaxation Training in Primigravida Women.  
18 *Women’s Heal Bull* 2014;**1**:e18968. <https://doi.org/10.17795/whb-18968>.
  - 19 32. Nattah FM, Abbas WAK. Assessment of Level of Pain and its Relation with Breathing  
20 Exercise in the First Stage of Labour among Primi Mothers at Hilla Teaching Hospital.  
21 *Eur J Sci Res* 2016;**135**:121–8.
  - 22 33. Yuksel H, Cayir Y, Kosan Z, et al. Effectiveness of breathing exercises during the  
23 second stage of labor on labor pain and duration : a randomized controlled trial. *J Integr*  
24 *Med* 2017;**15**:456–61. [https://doi.org/10.1016/S2095-4964\(17\)60368-6](https://doi.org/10.1016/S2095-4964(17)60368-6)
  - 25 34. Mathew AM, Francis F. Effectiveness of Foot Reflexology in Reduction of Labour  
26 Pain among Mothers in Labour Admitted at PSG Hospital, Coimbatore. *Int J Nurs Educ*  
27 2016;**8**:11–5. <https://doi.org/10.5958/0974-9357.2016.00081.7>
  - 28 35. Cohen M. The effectiveness of massage therapy a summary of evidence-based  
29 research. Melbourne:australian associaiton of massage therapy. Melbourne: :  
30 Australian Association of Massage Therapists 2011.
  - 31 36. Dolatian M, Hasanpour A, Montazeri S, et al. The effect of reflexology on pain  
32 intensity and duration of labor on primiparas. *Iran Red Crescent Med J* 2011;**13**:475–  
33 479.
  - 34 37. Valiani M, Shiran E, Kianpour M, et al. Reviewing the effect of reflexology on the pain  
35 and certain features and outcomes of the labor on the primiparous women. *Iran J Nurs*  
36 *Midwifery Res* 2010;**15**:302–310.

- 1  
2  
3 1 38. Baljon K, Romli MH, Ismail AH, et al. The Effectiveness of complementary and  
4 2 alternative medicine of massage and reflexology in managing pain and anxiety among  
5 3 primigravidas in labor: a systematic review. [in preparation for submission to a journal]  
6  
7  
8 4 39. Field T, Hernandez-Rief M, Diego M, et al. Cortisol decreases and serotonin increases  
9 5 following massage therapy. *J Neurosci* 2005;**115**:1397–413.  
10 6 <https://doi.org/10.1080/00207450590956459>  
11  
12 7 40. Crowe K, von Baeyer C. Predictors of a Positive Childbirth Experience. *Birth Iss*  
13 8 *Perinat C* 1989;**16**:59–63. <https://doi.org/10.1111/j.1523-536X.1989.tb00862.x>  
14  
15 9 41. Ma X, Yue ZQ, Gong ZQ, et al. The effect of diaphragmatic breathing on attention,  
16 10 negative affect and stress in healthy adults. *Front Psychol* 2017;**8**:1–12.  
17 11 <https://doi.org/10.3389/fpsyg.2017.00874>  
18  
19  
20 12 42. Bordoni B, Purgol S, Bizzarri A, et al. The Influence of Breathing on the Central  
21 13 Nervous System. *Cureus* 2018;**10**:1–8. <https://doi.org/10.7759/cureus.2724>  
22  
23 14 43. ElFattah AH, Metwaly S, Khedr N. Outcomes of foot reflexology on the pain and  
24 15 certain features of the labor for the primiparous women. *Life Sci J* 2015;**12**:206–16.  
25  
26 16 44. Vigotsky AD, Bruhns RP. The role of descending modulation in manual therapy and  
27 17 its analgesic implications: a narrative review. *Pain Res Treat* 2015;**2015**:292805.  
28 18 <https://doi.org/10.1155/2015/292805>  
29  
30  
31 19 45. Kaada B, Torsteinbø O. Increase of plasma beta-endorphins in connective tissue  
32 20 massage. *Gen Pharmacol* 1989;**20**:487–489. [https://doi.org/10.1016/0306-](https://doi.org/10.1016/0306-3623(89)90200-0)  
33 21 [3623\(89\)90200-0](https://doi.org/10.1016/0306-3623(89)90200-0)  
34  
35 22 46. Tiran D, Chummun H. The physiological basis of reflexology and its use as a potential  
36 23 diagnostic tool. *Complement Ther Clin Pract* 2005;**11**:58–64.  
37 24 <https://doi.org/10.1016/j.ctnm.2004.07.007>  
38  
39  
40 25 47. Embong NH, Soh YC, Ming LC, et al. Revisiting reflexology: Concept, evidence,  
41 26 current practice, and practitioner training. *J Tradit Complement Altern Med*  
42 27 2015;**5**:197–206.  
43  
44 28 48. Levy I, Attias S, Lavee TS, et al. The effectiveness of foot reflexology in reducing  
45 29 anxiety and duration of labor in primiparas: An open-label randomized controlled  
46 30 trial. *Complement Ther Clin Pract* 2020;**38**:101085.  
47 31 <https://doi.org/10.1016/j.ctcp.2019.101085>  
48  
49  
50 32 49. Yılar Erkek Z, Aktas S. The effect of foot reflexology on the anxiety levels of women  
51 33 in labor. *J Altern Complement Med Medicine*, 2018;**24**:352–60.  
52 34 <https://doi.org/10.1089/acm.2017.0263>  
53  
54 35 50. Tappan FM, Benjamin PJ. *Tappan's handbook for healing massage techniques.*  
55 36 *Classic, Holistic, and Emerging Methods*. 3rd Ed. Stamford, US : : Appleton & Lange

- 1  
2  
3 1 1998.  
4  
5  
6 2 51. Taheri H, Naseri-Salahshour V, Abedi A, et al. Comparing the effect of foot and hand  
7 3 reflexology on pain severity after appendectomy: A randomized clinical trial. *Iran J*  
8 4 *Nurs Midwifery Res* 2019;**24**:451–456. [https://doi.org/10.4103/ijnmr.IJNMR\\_85\\_18](https://doi.org/10.4103/ijnmr.IJNMR_85_18)  
9  
10 5 52. Tiran D, Evans M. Theoretical background to structural reflex zone therapy. In: Tiran  
11 6 D, ed. *Reflexology in Pregnancy and Childbirth*. London: : Elsevier 2010. 1–22.  
12  
13 7 53. Poole H, Glenn S, Murphy P. A randomised controlled study of reflexology for the  
14 8 management of chronic low back pain. *Eur J Pain* 2007;**11**:878–87.  
15 9 <https://doi.org/10.1016/j.ejpain.2007.01.006>  
16  
17 10 54. Keet L. *The reflexology bible*. 1st ed. London: : Octopus publishing group 2008.  
18  
19 11 55. Roudaut Y, Lonigro A, Coste B, et al. Touch sense: functional organization and  
20 12 molecular determinants of mechanosensitive receptors. *Channels* 2012;**6**:234–45.  
21 13 <https://doi.org/10.4161/chan.22213>  
22  
23 14 56. Goats GC. Massage--the scientific basis of an ancient art: Part 2. Physiological and  
24 15 therapeutic effects. *Br J Sports Med* 1994;**28**:153–6.  
25 16 <http://dx.doi.org/10.1136/bjism.28.3.153>  
26  
27 17 57. Basbaum AI, Fields HL. Endogenous pain control mechanisms: Review and  
28 18 hypothesis. *Ann Neurol* 1978;**4**:451–62. <http://dx.doi.org/10.1002/ana.410040511>  
29  
30 19 58. Weerapong P, Hume PA, Kolt GS. The mechanisms of massage and effects on  
31 20 performance, muscle recovery and injury prevention. *Sport Med* 2005;**35**:235–56.  
32 21 <http://dx.doi.org/10.2165/00007256-200535030-00004>  
33  
34 22 59. Morhenn V, Beavin LE, Zak PJ. Massage Increases Oxytocin and Reduces  
35 23 Adrenocorticotropin Hormone in Humans. *Altern Ther* 2012;**18**:11–8.  
36  
37 24 60. Li Q, Becker B, Wernicke J, et al. Foot massage evokes oxytocin release and activation  
38 25 of orbitofrontal cortex and superior temporal sulcus. *Psychoneuroendocrinology*  
39 26 2018;**101**:193–203. <http://dx.doi.org/10.1016/j.psyneuen.2018.11.016>  
40  
41 27 61. Bell AF, Erickson EN, Carter CS. Beyond Labor: The Role of Natural and Synthetic  
42 28 Oxytocin in The Transition To Motherhood. *J Midwifery Womens Heal* 2015;**59**:35–  
43 29 42. <http://dx.doi.org/10.1111/jmwh.12101>  
44  
45 30 62. Hu J, Brett A, Jiang Z, et al. A systematic review and meta-analysis of the effect of  
46 31 massage therapy in pain relief during labor. *J Nurs* 2017;**6**:1–14.  
47 32 <http://dx.doi.org/10.18686/jn.v6i4.130>  
48  
49 33 63. Huntley AL, Coon JT, Ernst E. Complementary and alternative medicine for labor  
50 34 pain : A systematic review. *Am J Obstet Gynecol* 2004;**191**:36–44. <http://dx.doi.org/10.1016/j.ajog.2003.12.008>  
51 35  
52  
53  
54  
55  
56  
57  
58  
59  
60

- 1  
2  
3  
4  
5  
6  
7  
8  
9  
10  
11  
12  
13  
14  
15  
16  
17  
18  
19  
20  
21  
22  
23  
24  
25  
26  
27  
28  
29  
30  
31  
32  
33  
34  
35  
36  
37  
38  
39  
40  
41  
42  
43  
44  
45  
46  
47  
48  
49  
50  
51  
52  
53  
54  
55  
56  
57  
58  
59  
60
- 1 64. Ranjbaran M, Khorsandi M, Matourypour P, et al. Effect of Massage Therapy on Labor  
2 Pain Reduction in Primiparous Women A Systematic Review and Meta-analysis of  
3 Randomized Controlled Clinical Trials in Iran. *Iran J Nurs Midwifery Res*  
4 2017;**22**:257–61.
- 5 65. Smith CA, Levett KM, Collins CT, et al. Massage , reflexology and other manual  
6 methods for pain management in labour. *Cochrane Database Rev* 2018.  
7 <https://doi.org/10.1002/14651858.CD009290.pub3>
- 8 66. Kirkham M. *The Midwife-Mother Relationship*. 2nd ed. Hampshire: : Red Globe Press  
9 2000.
- 10 67. Levett KM, Smith CA, Bensoussan A, et al. The Complementary Therapies for Labour  
11 and Birth Study: Making sense of labour and birth – experiences of women, partners  
12 and midwives of a complementary medicine antenatal education course. *Midwifery*  
13 2016;**40**:124–131. <http://dx.doi.org/10.1016/j.midw.2016.06.011>
- 14 68. Ministry of Health Saudi Arabia. Maternity and Children Hospital Makkah. 2013.  
15 <http://www.testonsserver.com/mch/> (accessed November 27, 2018).
- 16 69. Altaweli RF, McCourt C, Baron M. Childbirth care practices in public sector facilities  
17 in Jeddah, Saudi Arabia: A descriptive study. *Midwifery* 2014;**30**:899–909.  
18 <http://dx.doi.org/10.1016/j.midw.2014.03.006>
- 19 70. Farine D, Seaward PG. When it comes to pregnant women sleeping, is left right? *J*  
20 *Obstet Gynaecol Can* 2007;**29**:841–842.
- 21 71. Bonnel AM, Boureau F. Labor Pain Assessment : Validity of a Behavioral Index. *Pain*  
22 1985;**22**:81–90. [https://doi.org/10.1016/0304-3959\(85\)90150-2](https://doi.org/10.1016/0304-3959(85)90150-2)
- 23 72. Chang M, Wang S, Chen C. Effects of massage on pain and anxiety during labour : a  
24 randomized controlled trial in Taiwan. *J Adv Nurs* 2002;**38**:68–73.
- 25 73. Mårtensson L, Bergh I. Effect of treatment for labor pain : Verbal reports versus visual  
26 analogue scale scores - A prospective randomized study. *Int J Nurs Midwifery*  
27 2011;**3**:43–7.
- 28 74. Bahammam MA, Hassan MH. Validity and reliability of an Arabic version of the  
29 modified dental anxiety scale in Saudi adults. *Saudi Med J* 2014;**35**:1384.  
30 <http://dx.doi.org/10.2466/pr0.1997.80.3.947>
- 31 75. Hawker GA, Mian S, Kendzerska T, et al. Measures of adult pain: Visual analog scale  
32 for pain (vas pain), numeric rating scale for pain (nrs pain), mcgill pain questionnaire  
33 (mpq), short-form mcgill pain questionnaire (sf-mpq), chronic pain grade scale (cpgs),  
34 short form-36 bodily pain scale (sf-36 bps), and measure of intermittent and constant  
35 osteoarthritis pain (icoap). *Arthritis Care Res* 2011;**63**:S240–S252.  
36 [doi:10.1002/acr.20543](https://doi.org/10.1002/acr.20543)



- 1  
2  
3 1 76. Taghinejad H, Delpisheh A, Suhrabi Z. Comparison between massage and music  
4 2 therapies to relieve the severity of labor pain. *Womens Health* 2010;**6**:377–381.  
5 3 <https://doi.org/10.2217/WHE.10.15>  
6  
7  
8 4 77. Jensen MP, Karoly P, Braver S. The Measurement of Clinical Pain Intensity : a  
9 5 Comparison of Six Methods. *Pain Res Manag* 1986;**27**:117–26.  
10 6 [https://doi.org/10.1016/0304-3959\(86\)90228-9](https://doi.org/10.1016/0304-3959(86)90228-9)  
11  
12 7 78. Durat G, Çulhacik GD, Doğu Ö, et al. The development of an anxiety assessment scale  
13 8 for pregnant women in labor. *Saudi Med J* 2018;**39**:609–14.  
14 9 <http://dx.doi.org/10.15537/smj.2018.6.22266>  
15  
16  
17 10 79. Wei CK, Leng CY, Lin SKS. The use of the Visual Analogue Scale for the assessment  
18 11 of labour pain: a systematic review. *JBI Database Syst Rev Implement* 2010;**8**:972–  
19 12 1015  
20  
21 13 80. Harvey S, Rach D, Stainton MC, et al. Evaluation of satisfaction with midwifery  
22 14 care. *Midwifery* 2002;**18**:260–267. <http://dx.doi.org/10.1054/midw.2002.0317>  
23  
24 15 81. Bublitz MH, Bourjeily G, D'Angelo C, et al. Maternal sleep quality and diurnal cortisol  
25 16 regulation over pregnancy. *Behav Sleep Med* 2018;**16**:282–293.  
26 17 <https://doi.org/10.1080/15402002.2016.1210147>  
27  
28  
29 18 82. Larsson CA, Gullberg B, Råstam L, et al. Salivary cortisol differs with age and sex  
30 19 and shows inverse associations with WHR in Swedish women: a cross-sectional  
31 20 study. *BMC Endocr Disord* 2009;**9**:16.  
32  
33 21 83. Sundaram L, Swaminathan S, Ranjakumar T, et al. Intraocular pressure variation in  
34 22 pregnancy: a prospective study. *Int J Reprod Contracept Obstet Gynecol* 2017;**5**:1406–  
35 23 1409. <http://dx.doi.org/10.18203/2320-1770.ijrcog20161294>  
36  
37  
38 24 84. Romano A, Tempesta B, Micioni Di Bonaventura MV. et al. From autism to eating  
39 25 disorders and more: the role of oxytocin in neuropsychiatric disorders. *Fron Neurosci*  
40 26 2016;**9**:497. <https://doi.org/10.3389/fnins.2015.00497>  
41  
42 27 85. Uvnäs-Moberg K, Ekström-Bergström A, Berg M. et al. Maternal plasma levels of  
43 28 oxytocin during physiological childbirth—a systematic review with implications for  
44 29 uterine contractions and central actions of oxytocin. *BMC Pregnancy Childb*  
45 30 2009;**19**:285.  
46  
47  
48 31 86. Faul F, Erdfelder E, Lang AG, et al. G\* Power 3: A flexible statistical power analysis  
49 32 program for the social, behavioral, and biomedical sciences. *Behav Res Methods*  
50 33 2007;**39**:175–191.  
51  
52 34 87. Snyder M, Wieland J. Complementary and alternative therapies : what is their place in  
53 35 the management of chronic pain? *Nurs Clin North Am* 2003;**38**:495–508.  
54 36 [http://dx.doi.org/10.1016/S0029-6465\(02\)00098-1](http://dx.doi.org/10.1016/S0029-6465(02)00098-1)  
55  
56  
57  
58  
59

- 1  
2  
3 1 88. Sekhavat L, Behdad S. The effects of meperidine analgesia during labor on fetal heart  
4 2 rate. *Int J Biomed Sci* 2009;**5**:59.  
5  
6 3 89. Reynolds F. The effects of maternal labour analgesia on the fetus. *Best Pract Res Clin*  
7 4 *Obstet Gynaecol* 2010;**24**:289–302. <https://doi.org/10.1016/j.bpobgyn.2009.11.003>  
8  
9 5 90. Whitburn LY, Jones LE, Davey M, et al. The nature of labour pain : An updated review  
10 6 of the literature. *Women and Birth* 2018;**32**:28–38.  
11 7 <http://dx.doi.org/10.1016/j.wombi.2018.03.004>  
12  
13 8 91. Woo AK. Depression and Anxiety in Pain. *Br J Pain* 2010;**4**:8–12.  
14 9 <https://doi.org/10.1177/204946371000400103>  
15  
16 10 92. Turner JA, Deyo RA, Loeser JD, et al. The importance of placebo effects in pain  
17 11 treatment and research. *J Am Med Assoc* 1994;**271**:1609–1614.  
18 12 <https://doi.org/10.1001/jama.1994.03510440069036>  
19  
20 13 93. Brook CA, Schmidt LA. Social anxiety disorder: A review of environmental risk  
21 14 factors. *Neuropsychiatr Dis Treat* 2008;**4**:123–43.  
22  
23  
24  
25  
26  
27  
28  
29  
30  
31  
32  
33  
34  
35  
36  
37  
38  
39  
40  
41  
42  
43  
44  
45  
46  
47  
48  
49  
50  
51  
52  
53  
54  
55  
56  
57  
58  
59  
60

### Figure Legend

Figure 1 Mechanisms of action Reflexology therapy.

Figure 2 Mechanisms of action Massage therapy.

Figure 3 CONSORT flow diagram.

Figure 4 Research personnel training and responsibility matrix.

Figure 5 (a) shows the timeline of outcomes measurement in the intervention group; (b) shows the timeline of outcomes measurement in the control group.

**Table Legend**

Table 1 Steps of the Intervention.

Table 2 Summary of Primary Outcomes and Measurement Tools.

Table 3 Summary of Secondary Outcomes and Measurement Tools.

For peer review only

**Table 1: Steps of the Intervention**

| <b>Steps</b>                                                          | <b>Process</b>                                                                                                                                                                                        |
|-----------------------------------------------------------------------|-------------------------------------------------------------------------------------------------------------------------------------------------------------------------------------------------------|
| 1.                                                                    | Prepare the equipment.                                                                                                                                                                                |
| 2.                                                                    | Explain the procedure to the primigravida & advise her to lay on her left side* with a pillow on the side of her stomach.                                                                             |
| <b>Breathing Exercise Intervention for 5 minutes</b>                  |                                                                                                                                                                                                       |
| 3.                                                                    | Ask the primigravida to perform deep breathing by inhaling slowly through the nose for two seconds and then consciously release the air by breathing out for another two seconds during contractions. |
| 4.                                                                    | Rest for 1–3 seconds, then repeat the same technique for a total of 5 minutes. Then proceed to the reflexology as described below.                                                                    |
| <b>Reflexology Intervention Technique for 10 minutes on each foot</b> |                                                                                                                                                                                                       |
| 5.                                                                    | Put a towel under the right foot and cover the left leg.                                                                                                                                              |
| 6.                                                                    | Apply warm oil over the right foot and roll it left to right 5 times.                                                                                                                                 |
| 7.                                                                    | Press palms on the Achilles heel and knead the ankle 5 times.                                                                                                                                         |
| 8.                                                                    | Knead the thumb pads on the central and bottom parts of the heel 5 times.                                                                                                                             |
| 9.                                                                    | Knead the foot following the CIUW** shape on the lateral and intermediate aspects of the foot followed by the MST*** shape 5 times.                                                                   |
| 10.                                                                   | Press the wooden reflexology stick on the toes, forefoot, mid-foot, and hind-foot 5 times.                                                                                                            |
| 11.                                                                   | Repeat Steps 5–11 on the opposite side. Then proceed to the next lower limbs massage.                                                                                                                 |
| <b>Lower Limbs Massage for 2 minutes 30 seconds on each leg</b>       |                                                                                                                                                                                                       |
| 12.                                                                   | Effleurage massage on the whole, lower flexed leg by using two hands 3 times.                                                                                                                         |
| 13.                                                                   | Half effleurage massage from the heel to the popliteal area 3 times.                                                                                                                                  |
| 14.                                                                   | Palm and thumb kneading on the gastrocnemius muscle over the lateral & medial sides, followed by scooping on the gastrocnemius, each step 3 times.                                                    |
| 15.                                                                   | Thumb kneading on the hamstring muscle over the medial, intermediate, and lateral sides 3 times.                                                                                                      |
| 16.                                                                   | Repeat Steps 12–17 on the right leg. Then proceed to lower back massage.                                                                                                                              |
| <b>Lower Back Massage for 15 minutes</b>                              |                                                                                                                                                                                                       |
| 17.                                                                   | Effleurage massage from the sacrum to the shoulders and deltoids 3 times.                                                                                                                             |
| 18.                                                                   | Thumb kneading & pressure over the lateral sides of the lumbar area of the spine 3 times.                                                                                                             |
| 19.                                                                   | Apply fist knuckling motion and thumb kneading on the lower back, side by side, 3 times. Then proceed to upper back massage.                                                                          |

---

**Upper Back Massage for 15 minutes**

20. Effleurage massage followed by palm kneading from the lumbar region to trapezius laterally 3 times.
  21. Thumb kneading over both sides of erector spinae, then draining between the ribs towards the armpit areas 3 times.
  22. Apply squeeze on the deltoid muscle with draining towards the armpit 3 times.
  23. Apply finger kneading on trapezius muscle, followed by fist scooping 3 times.
  24. Finally, press on the neck and shoulder area on both sides 3 times.
- 

\* The left side position allows maximum blood flow to the placenta, because it applies less pressure from the foetus on the vena cava.<sup>70</sup>

\*\*CIUW shape: C-shape; I-shape; U-shape, and W-shape. These shapes indicate the orientation and placement of the palms and knuckles of the therapist.

\*\*\*MST shape: M-shape, S-shape, and T-shape. These shapes indicate the orientation and placement of the palms and knuckles of the therapist.

**Table 2: Summary of Primary Outcomes and Measurement Tools**

| Primary Outcomes | Tools  | Psychometric tests                                                                                                                                                                                                                                                                    | Method of assessment                                                                                                                                                                       |
|------------------|--------|---------------------------------------------------------------------------------------------------------------------------------------------------------------------------------------------------------------------------------------------------------------------------------------|--------------------------------------------------------------------------------------------------------------------------------------------------------------------------------------------|
| <b>Pain</b>      | PBI    | 100% inter-rater reliability<br><i>r</i> coefficient was 0.45, 0.50, and 0.44 between PBI and PPI. <sup>71,72</sup>                                                                                                                                                                   | Assessor-rated, <sup>71</sup> five-category behavioural observation scale                                                                                                                  |
|                  | VAS    | Moderate correlation ( <i>r</i> = 0.54) with the verbal rating and is considered valuable when mixed with other tools; <sup>73,74</sup> 0.97 intraclass correlation coefficient of 24 hours interval test-retest reliability. <sup>75</sup>                                           | Self-reported VAS, <sup>76</sup> contains six different coloured parts anchored by two extremes of 'no pain' and excruciating pain to mark on the line-map by primigravidae. <sup>77</sup> |
| <b>Anxiety</b>   | AASPWL | > 0.8 concordance test content validity index Kendall's <i>W</i> between the opinions of the experts ( <i>W</i> = 0.090; <i>P</i> = 0.080) with Cronbach's alpha level of 0.77; <sup>78</sup> significantly correlated ( <i>r</i> = 0.369) with the Beck Anxiety Scale. <sup>78</sup> | Questionnaire consists of nine items, <sup>78</sup> on a 5-point scale: the higher the mean score the higher the anxiety                                                                   |

PBI= Present Behavioural Intensity; VAS= Visual Analog Scale; AASPWL= Anxiety Assessment Scale for Pregnant Women in Labour.

**Table 3 Summary of Secondary Outcomes and Measurement Tools**

| <b>Secondary outcomes</b>             | <b>Measurement tools</b>                  | <b>Method of assessment</b>                                                                                                                         |
|---------------------------------------|-------------------------------------------|-----------------------------------------------------------------------------------------------------------------------------------------------------|
| <b>Maternal stress hormones level</b> | Blood sample for ACTH, cortisol, oxytocin | Blood sample will be drawn from the median cubital vein during the insertion of IV cannula (routine care)                                           |
| <b>Maternal vital sign</b>            | Thermometer<br>Sphygmomanometer           | Recorded on the vital sign monitoring chart and cardiocograph.                                                                                      |
| <b>FHR</b>                            | Cardiocograph                             | Recorded on the vital sign monitoring chart, cardiocograph chart, and partograph.                                                                   |
| <b>Duration of labour</b>             | Partograph                                | Partograph at two separate time intervals, a sum of labour duration from 3 to 6 cm of cervical dilatation and from 6 cm to delivery of the placenta |
| <b>Neonatal Apgar score</b>           | Apgar score table                         | Taken from the delivery room medical record                                                                                                         |
| <b>Maternal satisfaction</b>          | Six Simple Questions. <sup>80</sup>       | Self-reported 7-point scale (1-7) from “strongly disagree to “strongly agree” with higher scores signifying the higher level of satisfaction        |

ACTH= adrenocorticotropic hormone



# Mechanisms of the Reflexology

pressure on certain reflex points

1  
2  
3  
4  
5  
6  
7  
8  
9  
10  
11  
12  
13  
14  
15  
16  
17  
18  
19  
20  
21  
22  
23  
24  
25  
26  
27  
28  
29  
30  
31  
32  
33  
34  
35  
36  
37  
38  
39  
40  
41  
42  
43  
44  
45  
46



# Mechanisms of Massage



1  
2  
3  
4  
5  
6  
7  
8  
9  
10  
11  
12  
13  
14  
15  
16  
17  
18  
19  
20  
21  
22  
23  
24  
25  
26  
27  
28  
29  
30  
31  
32  
33  
34  
35  
36  
37  
38  
39  
40  
41  
42  
43  
44  
45  
46  
47  
48  
49  
50  
51  
52  
53  
54  
55  
56  
57  
58  
59  
60

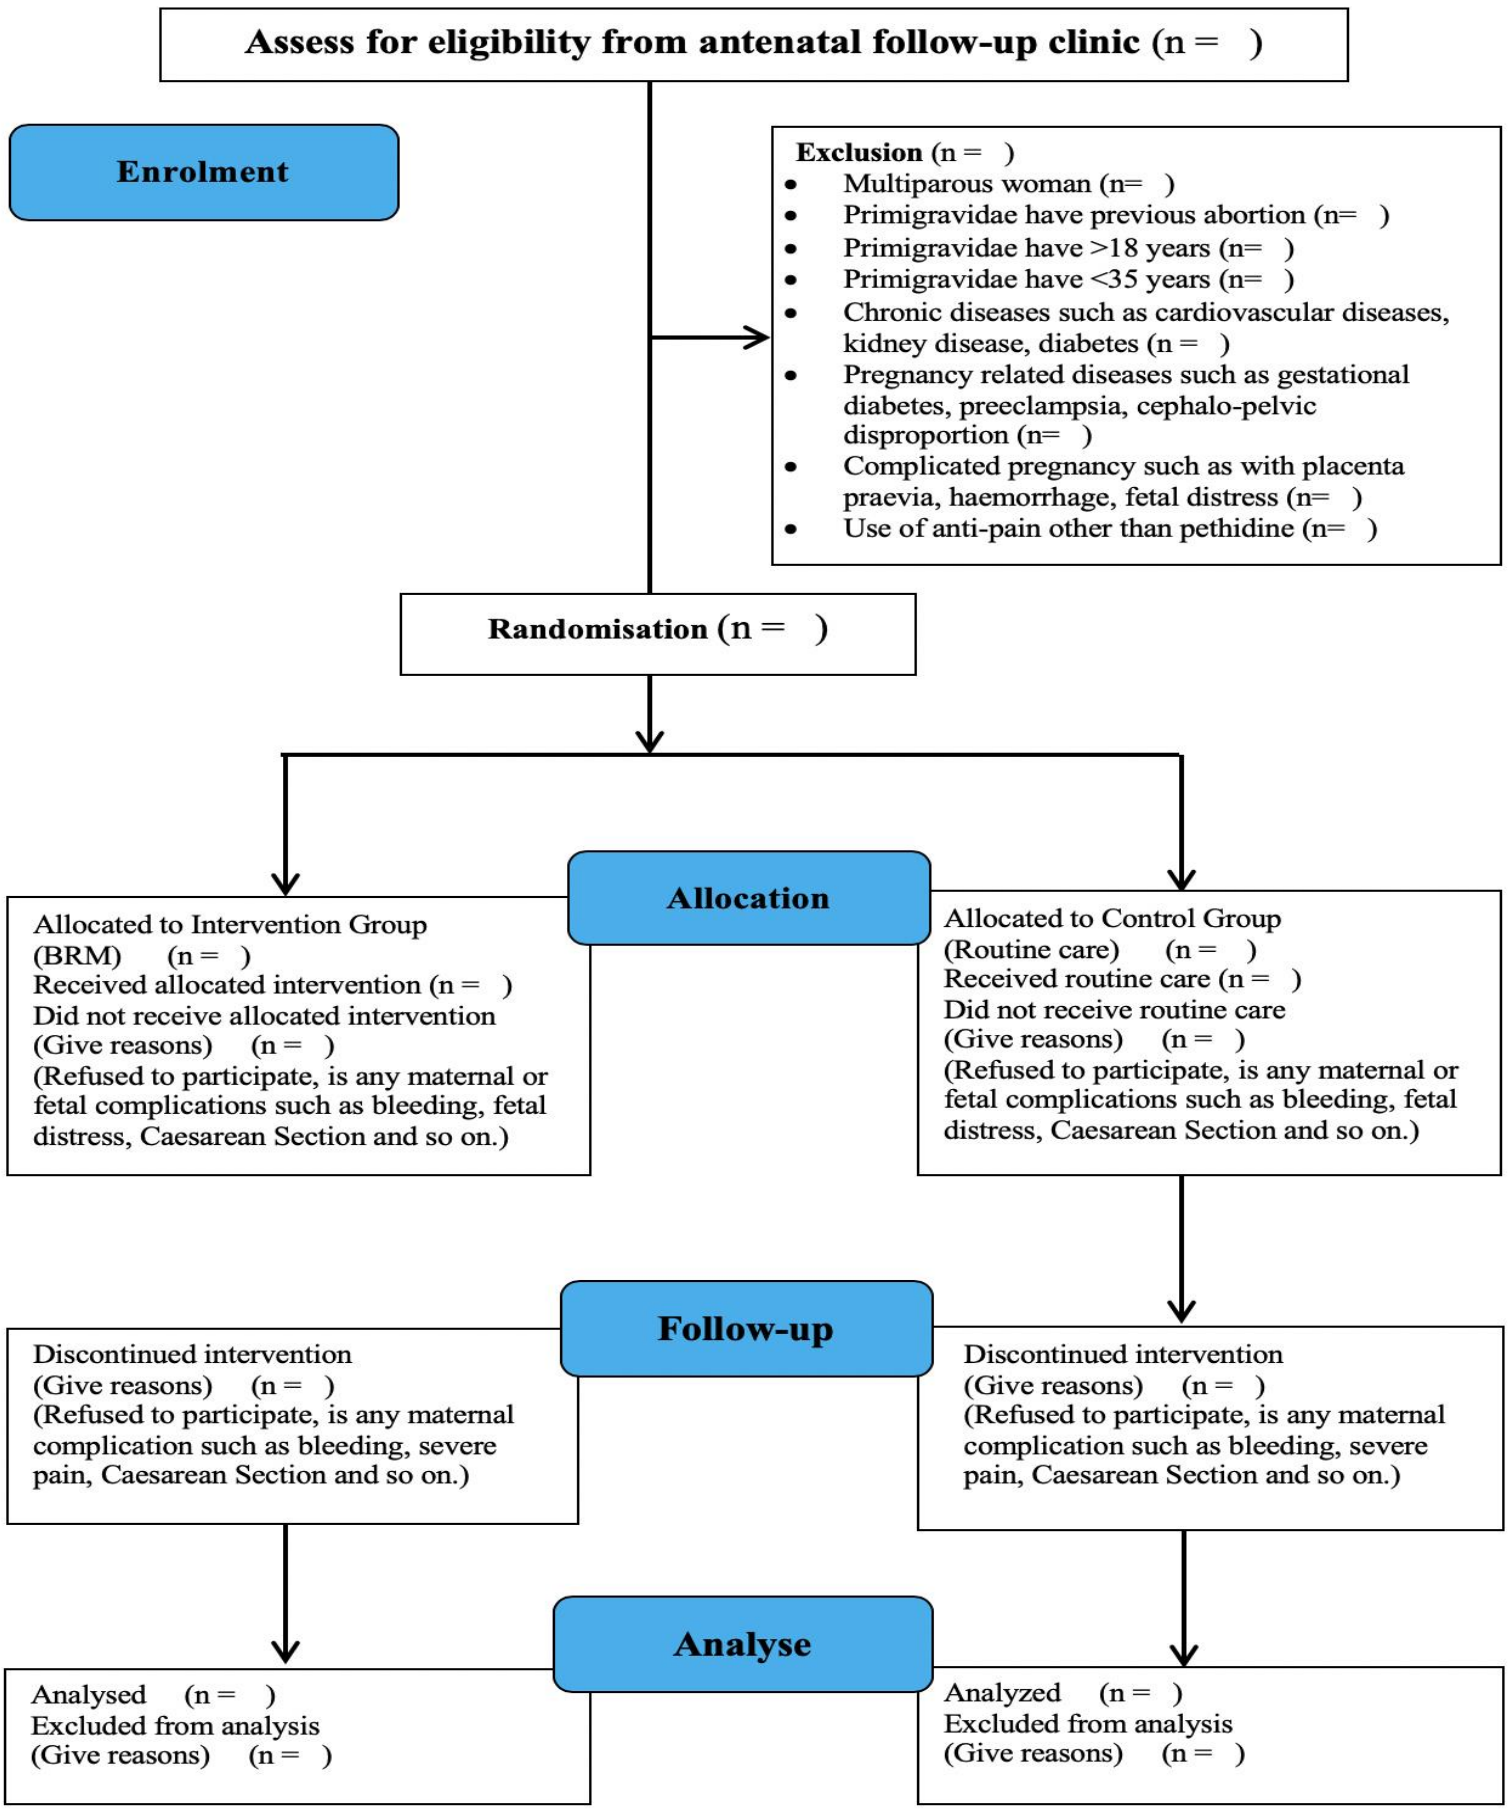

### 13 Research Assistants + 1 Principal Investigator

- Recruitment of nursing students who completed a 5-year nursing degree training and awaiting their job posting.
- Assigned to their preferred and suitable roles (coordinators, the outcome assessors, or massage therapists).
- One week training as research assistants in their respective roles.
- A pilot study to ensure their competency.
- Written study manual as a reference guide to be provided to all research assistants.



Research coordinators  
(4 pax.)

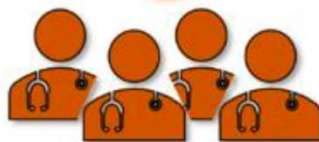

Outcome Assessors  
(4 pax.)



Massage therapists  
(5 pax.)

- Recruit eligible primigravidae at the antenatal clinic deliver brief health education on labour pain management at the antenatal clinic for 6 weeks.
- Reassess the primigravidae women's consent and eligibility,
- Allocate the women to either the intervention or control group.
- Alert the massage therapists and outcome assessors when the cervical dilatation of the trial participant reaches 6 cm.
- Distribute outcomes assessment record form to the outcome assessors.
- Encode the questionnaire package according to the participant's allocated group.
- Organise the entry sequence for the outcome assessors and the massage therapists to enter the delivery rooms according to the scheduled time.

- Assess and fill-up questionnaires:
  - Present behavioural Intensity (PBI).
  - Visual Analog Scale (VAS).
  - Anxiety Assessment Scale for primigravidae Women in labour (AASPWL),
  - Six Simple Questions (SSQ) for maternal satisfaction.
- Retrieve the maternal vital signs, fetal heart rate, duration of labour, and neonatal Apgar score from the health records.
- Record all the outcomes in the designated form.

- Perform breathing exercise, foot reflexology and back massage during labour (BRM).
  - Breathing exercise (5min).
  - Foot Reflexology (10 min on each foot),
  - Back massage (35min).

Sub-divided into two shifts per day to ensure all the eligible and consented primigravidae will be captured



Day Shift (9 am - 9pm)

2 Coordinators, 3 Massage therapists, and 2 Outcome Assessors



Night Shift (9 pm - 9 am)

2 Coordinators, 2 Massage therapists, 2 Outcome Assessors, and Principal Investigator
